# Supplementary material for: Palladium-catalyzed phosphonyldifluoromethylation of alkenes with bromodifluoromethylphosphonate
Source: Royal Society of Chemistry journal article supplement (doi:10.1039/c6qo00005c), 2016-01-01

*Supporting Information for*

## **Palladium-catalyzed phosphonyldifluoromethylation of alkenes with bromodifluoromethylphosphonate**

**Zhang Feng, Yu-Lan Xiao, and Xingang Zhang\***

*Key Laboratory of Organofluorine Chemistry, Shanghai Institute of Organic Chemistry, Chinese Academy of Sciences,  
345 Lingling Road, Shanghai 200032, China  
[xgzhang@mail.sioc.ac.cn](mailto:xgzhang@mail.sioc.ac.cn)*

## List of Contents

|                                                                                                                     |     |
|---------------------------------------------------------------------------------------------------------------------|-----|
| 1) Screens for Pd-catalyzed Heck-type reaction of Bromodifluoromethylphosphonate with styrene .....                 | S3  |
| 2) General Procedure for Pd-Catalyzed Heck-Type Reaction of Bromodifluoromethylphosphonate with Alkenes. ....       | S6  |
| 3) Data for Compounds <b>3</b> , <b>4</b> .....                                                                     | S6  |
| 4) Data for Compound <b>5</b> .....                                                                                 | S13 |
| 5) Data for Compound <b>7</b> .....                                                                                 | S14 |
| 6) Inhibition Experiments for Pd-Catalyzed Cross-Coupling of <b>1a</b> with <b>2a</b> .....                         | S14 |
| 7) Mechanistic Studies.....                                                                                         | S14 |
| 8) Copies of <sup>1</sup> H NMR, <sup>19</sup> F NMR and <sup>13</sup> C NMR spectra of <b>3</b> and <b>4</b> ..... | S16 |
| 9) Copies of <sup>1</sup> H NMR, <sup>19</sup> F NMR and <sup>13</sup> C NMR spectra of <b>5</b> .....              | S41 |
| 10) Copies of <sup>1</sup> H NMR, <sup>19</sup> F NMR and <sup>13</sup> C NMR spectra of <b>7</b> .....             | S43 |

**General information:**  $^1\text{H}$  NMR and  $^{13}\text{C}$  NMR spectra were recorded on a Bruker AM400 and AM500 spectrometer.  $^{19}\text{F}$  NMR was recorded on a Bruker AM400 spectrometer ( $\text{CFCl}_3$  as an external standard and low field is positive). Chemical shifts ( $\delta$ ) are reported in ppm, and coupling constants ( $J$ ) are in Hertz (Hz). The following abbreviations were used to explain the multiplicities: s = singlet, d = doublet, t = triplet, q = quartet, m = multiplet, br = broad. NMR yield was determined by  $^{19}\text{F}$  NMR using fluorobenzene as an internal standard before working up the reaction.

**Materials:** All reagents were used as received from commercial sources, unless specified otherwise. All reagents were weighed and handled in air, and refilled with an inert atmosphere of  $\text{N}_2$  at room temperature. DCE was distilled from  $\text{CaH}_2$ . 1,4-Dioxane and toluene were distilled from sodium and benzophenone immediately before use.

**Screening for Pd-Catalyzed Heck-Type Reaction of Bromodifluoromethylphosphonate with Styrene (Tables S1-3).** To a 25 mL of Schlenk tube were added [Pd] (5-10 mol %), ligand (10-20 mol %) under air, followed by base (2.0 equiv). The mixture was then evacuated and backfilled with  $\text{N}_2$  (3 times). Bromodifluoromethylphosphonate **1** (2 equiv), styrene **2a** (0.3 mmol) and solvent (2 mL) were added subsequently. The reaction mixture was heated to 80-120  $^\circ\text{C}$  (oil bath). After stirring for 24 h, the reaction mixture was cooled to room temperature. The yield was determined by  $^{19}\text{F}$  NMR before working up. If necessary, the reaction mixture was diluted with EtOAc and filtered with a pad of celite. The filtrate was concentrated, and the residue was purified with silica gel chromatography (Petroleum ether/EtOAc = 3:1) to give product **3a**.

**Table S1. Screening of Palladium Sources<sup>a</sup>**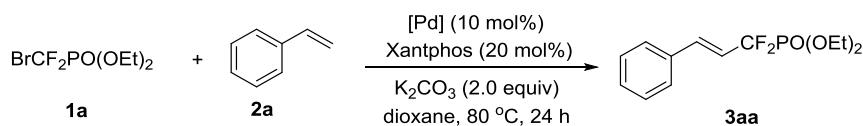

| Entry | [Pd](mol %)                                             | Ligand (mol %) | Yield (%) <sup>b</sup> |
|-------|---------------------------------------------------------|----------------|------------------------|
| 1     | Pd(PhCN) <sub>2</sub> Cl <sub>2</sub> (10)              | 20             | Nd                     |
| 2     | PdCl <sub>2</sub> (10)                                  | 20             | Nd                     |
| 3     | PdCl <sub>2</sub> (PPh <sub>3</sub> ) <sub>2</sub> (10) | 20             | Nd                     |
| 4     | PdCl <sub>2</sub> (dppf) (10)                           | 20             | Nd                     |
| 5     | PdCl <sub>2</sub> (MeCN) <sub>2</sub> (10)              | 20             | Trace                  |
| 6     | [PdCl(C <sub>3</sub> H <sub>5</sub> )] <sub>2</sub> (5) | 20             | Nd                     |
| 7     | Pd(PPh <sub>3</sub> ) <sub>4</sub> (10)                 | 20             | Nd                     |
| 8     | Pd <sub>2</sub> (dba) <sub>3</sub> (5)                  | 20             | Nd                     |

<sup>a</sup>Reaction conditions (unless otherwise specified): **2a** (0.3 mmol, 1.0 equiv), **1a** (2.0 equiv), dioxane (2 mL), 24 h.

<sup>b</sup>Determined by <sup>19</sup>F NMR using fluorobenzene as an internal standard.

**Table S2. Screening of Ligands<sup>a</sup>**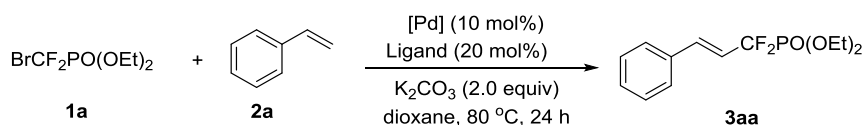

| Entry | Ligand (20 mol%) | Yield (%) <sup>b</sup> |
|-------|------------------|------------------------|
| 1     | <b>Xantphos</b>  | Trace                  |
| 2     | DpePhos          | Trace                  |
| 3     | dppe             | Nd                     |
| 4     | dppp             | Nd                     |
| 5     | dppb             | Nd                     |
| 6     | dppf             | Trace                  |
| 7     | BINAP            | Nd                     |
| 8     | JohnPhos         | Nd                     |
| 9     | MePhos           | Nd                     |
| 10    | DavePhos         | Nd                     |
| 11    | XPhos            | Nd                     |
| 12    | RuPhos           | Nd                     |
| 13    | SPhos            | Nd                     |

<sup>a</sup>Reaction conditions (unless otherwise specified): **2a** (0.3 mmol, 1.0 equiv), **1a** (2.0 equiv), dioxane (2 mL), 24 h.

<sup>b</sup>Determined by <sup>19</sup>F NMR using fluorobenzene as internal standard .

**Table S3. Optimization of Palladium-Catalyzed Heck-type Reaction of Bromodifluoromethylphosphonate with Styrene.<sup>a</sup>**

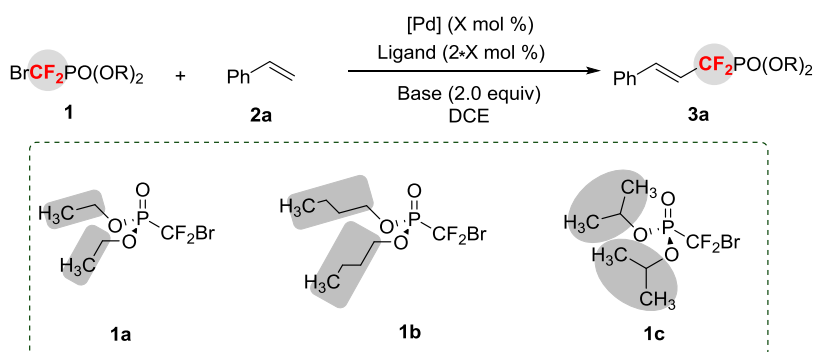

| Entry                 | Substrate | [Pd](mol %)                                             | Solvent    | Ligand (mol%)        | Base                               | <b>3a</b> , Yield(%) <sup>b</sup> |
|-----------------------|-----------|---------------------------------------------------------|------------|----------------------|------------------------------------|-----------------------------------|
| 1                     | <b>1a</b> | Pd(MeCN) <sub>2</sub> Cl <sub>2</sub> (10)              | DCE        | Xantphos (20)        | K <sub>2</sub> CO <sub>3</sub>     | <b>3aa</b> , Trace                |
| 3                     | <b>1b</b> | Pd(MeCN) <sub>2</sub> Cl <sub>2</sub> (10)              | DCE        | Xantphos (20)        | K <sub>2</sub> CO <sub>3</sub>     | <b>3aa</b> , 12                   |
| 4                     | <b>1b</b> | Pd(PPh <sub>3</sub> ) <sub>4</sub> (10)                 | DCE        | Xantphos (20)        | K <sub>2</sub> CO <sub>3</sub>     | <b>3aa</b> , 10                   |
| 5                     | <b>1c</b> | Pd(MeCN) <sub>2</sub> Cl <sub>2</sub> (10)              | DCE        | Xantphos (20)        | K <sub>2</sub> CO <sub>3</sub>     | <b>3ac</b> , 21                   |
| 6                     | <b>1c</b> | Pd(PhCN) <sub>2</sub> Cl <sub>2</sub> (10)              | DCE        | Xantphos (20)        | K <sub>2</sub> CO <sub>3</sub>     | <b>3ac</b> , 41                   |
| 7                     | <b>1c</b> | PdCl <sub>2</sub> (10)                                  | DCE        | Xantphos (20)        | K <sub>2</sub> CO <sub>3</sub>     | <b>3ac</b> , 39                   |
| 8                     | <b>1c</b> | PdCl <sub>2</sub> (PPh <sub>3</sub> ) <sub>2</sub> (10) | DCE        | Xantphos (20)        | K <sub>2</sub> CO <sub>3</sub>     | <b>3ac</b> , 28                   |
| 9                     | <b>1c</b> | PdCl <sub>2</sub> (dppf) (10)                           | DCE        | Xantphos (20)        | K <sub>2</sub> CO <sub>3</sub>     | <b>3ac</b> , Trace                |
| 10                    | <b>1c</b> | [PdCl(C <sub>3</sub> H <sub>5</sub> )] <sub>2</sub> (5) | DCE        | Xantphos (20)        | K <sub>2</sub> CO <sub>3</sub>     | <b>3ac</b> , Nd                   |
| 11                    | <b>1c</b> | Pd(PPh <sub>3</sub> ) <sub>4</sub> (10)                 | DCE        | Xantphos (20)        | K <sub>2</sub> CO <sub>3</sub>     | <b>3ac</b> , 31                   |
| 12                    | <b>1c</b> | Pd(PhCN) <sub>2</sub> Cl <sub>2</sub> (10)              | DCE        | Xantphos (20)        | K <sub>3</sub> PO <sub>4</sub>     | <b>3ac</b> , 50                   |
| 13                    | <b>1c</b> | Pd(PhCN) <sub>2</sub> Cl <sub>2</sub> (10)              | DCE        | Xantphos (20)        | Cs <sub>2</sub> CO <sub>3</sub>    | <b>3ac</b> , Nd                   |
| 14                    | <b>1c</b> | Pd(PhCN) <sub>2</sub> Cl <sub>2</sub> (10)              | DCE        | Xantphos (20)        | Na <sub>2</sub> CO <sub>3</sub>    | <b>3ac</b> , 44                   |
| 15                    | <b>1c</b> | Pd(PhCN) <sub>2</sub> Cl <sub>2</sub> (10)              | Dioxane    | Xantphos (20)        | K <sub>3</sub> PO <sub>4</sub>     | <b>3ac</b> , 2                    |
| 16                    | <b>1c</b> | Pd(PhCN) <sub>2</sub> Cl <sub>2</sub> (10)              | toluene    | Xantphos (20)        | K <sub>3</sub> PO <sub>4</sub>     | <b>3ac</b> , 0                    |
| 17                    | <b>1c</b> | Pd(PhCN) <sub>2</sub> Cl <sub>2</sub> (10)              | DCE        | DpePhos (20)         | K <sub>3</sub> PO <sub>4</sub>     | <b>3ac</b> , 35                   |
| 18                    | <b>1c</b> | Pd(PhCN) <sub>2</sub> Cl <sub>2</sub> (10)              | DCE        | dppf (20)            | K <sub>3</sub> PO <sub>4</sub>     | <b>3ac</b> , 22                   |
| 19 <sup>c</sup>       | <b>1c</b> | Pd(PhCN) <sub>2</sub> Cl <sub>2</sub> (10)              | DCE        | Xantphos (20)        | K <sub>3</sub> PO <sub>4</sub>     | <b>3ac</b> , 47                   |
| 20 <sup>d</sup>       | <b>1c</b> | Pd(PhCN) <sub>2</sub> Cl <sub>2</sub> (10)              | DCE        | Xantphos (20)        | K <sub>3</sub> PO <sub>4</sub>     | <b>3ac</b> , (94)                 |
| <b>21<sup>d</sup></b> | <b>1c</b> | <b>Pd(PhCN)<sub>2</sub>Cl<sub>2</sub> (5)</b>           | <b>DCE</b> | <b>Xantphos (10)</b> | <b>K<sub>3</sub>PO<sub>4</sub></b> | <b>3ac, (92)</b>                  |
| 22 <sup>d</sup>       | <b>2c</b> | none                                                    | DCE        | Xantphos (10)        | K <sub>3</sub> PO <sub>4</sub>     | <b>3ac</b> , Nd                   |
| 23 <sup>d</sup>       | <b>2c</b> | Pd(PhCN) <sub>2</sub> Cl <sub>2</sub> (5)               | DCE        | none                 | K <sub>3</sub> PO <sub>4</sub>     | <b>3ac</b> , Nd                   |

<sup>a</sup>Reaction conditions (unless otherwise specified): **2a** (0.3 mmol, 1.0 equiv), **1** (2.0 equiv), solvent (2 mL), 80 °C, 24 h. <sup>b</sup>Determined by <sup>19</sup>F NMR using fluorobenzene as internal standard (isolated yield in parentheses). <sup>c</sup>Reaction run at 100 °C for 12 h. <sup>d</sup>Reaction run at 120 °C for 12 h.

## General Procedure for Palladium-Catalyzed Heck-type Reaction of Bromodifluoromethylphosphonate with alkenes.

To a 25 mL of Schlenk tube were added Pd(PhCN)<sub>2</sub>Cl<sub>2</sub> (5 mol %), Xantphos (10 mol %) under air, followed by anhydrous K<sub>2</sub>CO<sub>3</sub> (2.0 equiv). The mixture was then evacuated and backfilled with N<sub>2</sub> (3 times). Bromodifluoromethylphosphonate **1c** (2 equiv), alkene **2** (0.3 mmol) and fresh distilled DCE (2 mL) were added subsequently. The reaction mixture was heated to 120 °C (oil bath). After stirring for 12 h, the reaction was cooled to room temperature. The reaction mixture was diluted with EtOAc and filtered with a pad of cellite. The filtrate was concentrated, and the residue was purified with silica gel chromatography (Petroleum ether/EtOAc = 3:1) to give product.

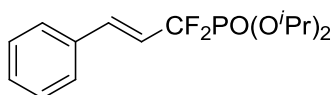

**(E)-Diisopropyl (1,1-difluoro-3-phenylallyl)phosphonate (3ac).** The product (88 mg, 92% yield) as a colorless oil was purified with silica gel chromatography (Petroleum ether/EtOAc = 3:1). <sup>1</sup>H NMR (400 MHz, CDCl<sub>3</sub>) δ 7.46-7.42 (m, 2 H), 7.39-7.32 (m, 3 H), 7.06 (dtd, *J* = 16.4 Hz, *J* = 2.8 Hz, *J* = 2.8 Hz, 1 H), 6.30 (m, 1 H), 4.87 (m, 2 H), 1.38 (d, *J* = 6.4 Hz, 6 H), 1.35 (d, *J* = 6.0 Hz, 6 H). <sup>19</sup>F NMR (376 MHz, CDCl<sub>3</sub>) δ -109.3 (ddd, *J* = 114.3 Hz, *J* = 12.8 Hz, *J* = 2.8 Hz, 2 F). <sup>13</sup>C NMR (101 MHz, CDCl<sub>3</sub>) δ 136.7 (td, *J* = 10.6 Hz, *J* = 6.1 Hz), 134.4 (m), 129.4, 128.8, 127.4 (m), 119.1 (td, *J* = 21.1 Hz, *J* = 13.0 Hz), 117.2 (td, *J* = 258.1 Hz, *J* = 222.3 Hz), 73.8, 73.7, 24.2, 24.1, 23.8, 23.7. MS (EI): *m/z* (%) 318 (M<sup>+</sup>), 234, 153 (100). HRMS calcd. for C<sub>15</sub>H<sub>21</sub>F<sub>2</sub>O<sub>3</sub>P (M<sup>+</sup>): 318.1196; Found: 318.1197. IR (thin film) ν<sub>max</sub> 2983, 1653 cm<sup>-1</sup>.

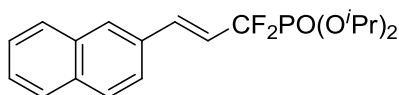

**(E)-Diisopropyl (1,1-difluoro-3-(naphthalen-2-yl)allyl)phosphonate (3b).** The product (95 mg, 86% yield) as a colorless oil was purified with silica gel chromatography (Petroleum ether/EtOAc = 3:1). <sup>1</sup>H NMR (400 MHz, CDCl<sub>3</sub>) δ 7.84-7.82 (m, 4 H), 7.62 (dd, *J* = 8.4 Hz, *J* = 1.6 Hz, 1 H), 7.52-7.48 (m, 2 H), 7.22 (dtd, *J* = 16.0 Hz, *J* = 2.8 Hz, *J* = 2.8 Hz, 1 H), 6.43 (m, 1 H), 4.89 (m, 2 H), 1.38 (d, *J* = 6.0 Hz, 6 H), 1.36 (d, *J* = 6.0 Hz, 6 H). <sup>19</sup>F NMR (376 MHz, CDCl<sub>3</sub>) δ -109.3 (ddd, *J* = 114.3 Hz, *J* = 12.9 Hz, *J* = 2.8 Hz, 2 F). <sup>13</sup>C NMR (101 MHz, CDCl<sub>3</sub>) δ 136.8 (td, *J* = 10.6 Hz, *J* =

6.1 Hz), 133.8, 133.3, 131.9, 128.6, 128.3, 127.7, 126.8, 126.6, 123.4, 119.3 (td,  $J = 21.1$  Hz,  $J = 10.9$  Hz), 117.4 (td,  $J = 257.9$  Hz,  $J = 222.2$  Hz), 73.9, 73.8, 24.21, 24.18, 23.8, 23.7. MS (EI):  $m/z$  (%) 368 ( $M^+$ ), 284, 203 (100). HRMS calcd. for  $C_{19}H_{23}F_2O_3P$  ( $M^+$ ): 368.1353; Found: 368.1357. IR (thin film)  $\nu_{\max}$  2983, 1653  $cm^{-1}$ .

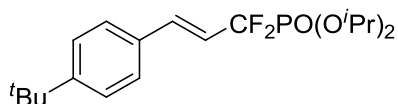

**(E)-diisopropyl (3-(4-(tert-butyl)phenyl)-1,1-difluoroallyl)phosphonate (3c).** The product (107 mg, 95% yield) as a colorless oil was purified with silica gel chromatography (Petroleum ether/EtOAc = 3:1).  $^1H$  NMR (400 MHz,  $CDCl_3$ )  $\delta$  7.39 (s, 4 H), 6.38 (dtd,  $J = 16.0$  Hz,  $J = 2.8$  Hz,  $J = 2.8$  Hz, 1 H), 6.25 (m, 1 H), 4.86 (m, 2 H), 1.37 (d,  $J = 6.4$  Hz, 6 H), 1.34 (d,  $J = 6.0$  Hz, 6 H), 1.30 (s, 9 H).  $^{19}F$  NMR (376 MHz,  $CDCl_3$ )  $\delta$  -109.9 (ddd,  $J = 115.1$  Hz,  $J = 12.9$  Hz,  $J = 2.9$  Hz, 2 F).  $^{13}C$  NMR (101 MHz,  $CDCl_3$ )  $\delta$  152.8, 136.6 (td,  $J = 10.6$  Hz,  $J = 6.2$  Hz), 131.8, 127.2, 125.7, 118.2 (td,  $J = 21.6$  Hz,  $J = 13.4$  Hz), 117.4 (td,  $J = 259.2$  Hz,  $J = 221.8$  Hz), 73.73, 73.66, 34.8, 31.2, 24.2, 24.1, 23.8, 23.7. MS (EI):  $m/z$  (%) 374 ( $M^+$ ), 209, 57 (100). HRMS calcd. for  $C_{19}H_{29}F_2O_3P$  ( $M^+$ ): 374.1822; Found: 374.1819. IR (thin film)  $\nu_{\max}$  2966, 1653, 1509  $cm^{-1}$ .

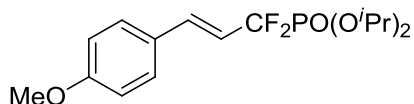

**(E)-diisopropyl (3-(4-(tert-butyl)phenyl)-1,1-difluoroallyl)phosphonate (3d).** The product (100 mg, 96% yield) as a colorless oil was purified with silica gel chromatography (Petroleum ether/EtOAc = 3:1).  $^1H$  NMR (400 MHz,  $CDCl_3$ )  $\delta$  7.39 (d,  $J = 8.7$  Hz, 2 H), 6.99 (dtd,  $J = 16.4$  Hz,  $J = 2.8$  Hz,  $J = 2.8$  Hz, 1 H), 6.88 (d,  $J = 8.7$  Hz, 2 H), 6.15 (m, 1 H), 4.86 (m, 2 H), 3.82 (s, 3 H), 1.36 (d,  $J = 6.0$  Hz, 6 H), 1.33 (d,  $J = 6.4$  Hz, 6 H).  $^{19}F$  NMR (376 MHz,  $CDCl_3$ )  $\delta$  -108.7 (ddd,  $J = 115.7$  Hz,  $J = 12.9$  Hz,  $J = 2.9$  Hz, 2 F).  $^{13}C$  NMR (101 MHz,  $CDCl_3$ )  $\delta$  160.6, 136.2 (td,  $J = 10.7$  Hz,  $J = 6.1$  Hz), 128.8, 127.3, 117.5 (td,  $J = 259.4$  Hz,  $J = 223.1$  Hz), 116.6 (td,  $J = 21.2$  Hz,  $J = 13.0$  Hz), 114.2, 73.7, 73.6, 55.3, 24.19, 24.16, 23.73, 23.68. MS (EI):  $m/z$  (%) 348 ( $M^+$ ), 183 (100). HRMS calcd. for  $C_{16}H_{23}F_2O_4P$  ( $M^+$ ): 348.1302; Found: 348.1307. IR (thin film)  $\nu_{\max}$  2983, 1653, 1607  $cm^{-1}$ .

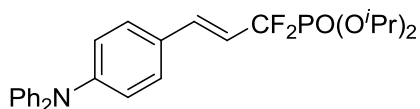

**(E)-Diisopropyl (3-(4-(diphenylamino)phenyl)-1,1-difluoroallyl)phosphonate (3e).** The product (135 mg, 93% yield) as a colorless oil was purified with silica gel chromatography (Petroleum ether/EtOAc = 3:1).  $^1\text{H}$  NMR (400 MHz,  $\text{CDCl}_3$ )  $\delta$  7.31-7.23 (m, 7 H), 7.12-7.10 (m, 3 H), 7.08-7.05 (m, 2 H), 7.02-6.95 (m, 3 H), 6.15 (m, 1 H), 4.87 (m, 2 H), 1.38 (d,  $J = 6.4$  Hz, 6 H), 1.36 (d,  $J = 6.4$  Hz, 6 H).  $^{19}\text{F}$  NMR (376 MHz,  $\text{CDCl}_3$ )  $\delta$  -108.5 (ddd,  $J = 116.2$  Hz,  $J = 13.0$  Hz,  $J = 2.6$  Hz, 2 F).  $^{13}\text{C}$  NMR (101 MHz,  $\text{CDCl}_3$ )  $\delta$  148.9, 147.1, 136.2 (td,  $J = 10.5$  Hz,  $J = 6.0$  Hz), 129.4, 128.3, 127.9, 124.9, 123.6, 122.4, 117.5 (td,  $J = 259.4$  Hz,  $J = 223.2$  Hz), 116.5 (td,  $J = 21.0$  Hz,  $J = 12.6$  Hz), 73.7, 73.6, 24.2, 24.17, 23.8, 23.7. MS (EI):  $m/z$  (%) 485 ( $\text{M}^+$ ), 320 (100). HRMS calcd. for  $\text{C}_{27}\text{H}_{30}\text{F}_2\text{O}_3\text{NP}$  ( $\text{M}^+$ ): 485.1931; Found: 485.1929. IR (thin film)  $\nu_{\text{max}}$  2982, 1647, 1592, 1508  $\text{cm}^{-1}$ .

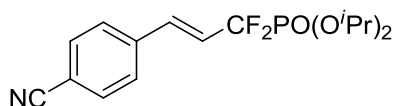

**(E)-Diisopropyl (3-(4-cyanophenyl)-1,1-difluoroallyl)phosphonate (3f).** The product (80 mg, 78% yield) as a colorless oil was purified with silica gel chromatography (Petroleum ether/EtOAc = 3:1).  $^1\text{H}$  NMR (400 MHz,  $\text{CDCl}_3$ )  $\delta$  7.65 (d,  $J = 8.4$  Hz, 2 H), 7.53 (d,  $J = 8.4$  Hz, 2 H), 7.05 (m, 1 H), 6.39 (m, 1 H), 4.86 (m, 2 H), 1.37 (d,  $J = 6.4$  Hz, 6 H), 1.33 (d,  $J = 6.0$  Hz, 6 H).  $^{19}\text{F}$  NMR (376 MHz,  $\text{CDCl}_3$ )  $\delta$  -110.3 (ddd,  $J = 111.6$  Hz,  $J = 12.5$  Hz,  $J = 2.6$  Hz, 2 F).  $^{13}\text{C}$  NMR (101 MHz,  $\text{CDCl}_3$ )  $\delta$  138.7, 134.9 (td,  $J = 10.6$  Hz,  $J = 5.8$  Hz), 132.6, 127.9, 122.9 (td,  $J = 21.4$  Hz,  $J = 12.8$  Hz), 118.4, 116.7 (td,  $J = 260.1$  Hz,  $J = 221.3$  Hz), 112.7, 74.1, 74.0, 24.12, 24.08, 23.72, 23.67. MS (EI):  $m/z$  (%) 343 ( $\text{M}^+$ ), 259, 179, 123 (100). HRMS calcd. for  $\text{C}_{16}\text{H}_{20}\text{F}_2\text{O}_3\text{PN}$  ( $\text{M}^+$ ): 343.1149; Found: 343.1154. IR (thin film)  $\nu_{\text{max}}$  2984, 2936, 2228, 1654, 1507  $\text{cm}^{-1}$ .

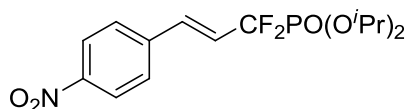

**(E)-Diisopropyl (1,1-difluoro-3-(4-nitrophenyl)allyl)phosphonate (3g).** The product (60 mg, 55% yield) as a colorless oil was purified with silica gel chromatography (Petroleum ether/EtOAc = 3:1).  $^1\text{H}$  NMR (400 MHz,  $\text{CDCl}_3$ )  $\delta$  8.24 (d,  $J = 8.7$  Hz, 2H), 7.60 (d,  $J = 8.7$  Hz, 2H), 7.11 (dtd,  $J = 16.4$ ,  $J = 12.4$ ,  $J = 2.3$  Hz, 1H), 6.45 (m, 1H), 4.86 (m, 2 H), 1.38 (d,  $J = 6.0$  Hz, 6 H), 1.35 (d,  $J = 6.0$  Hz,



6 H).  $^{19}\text{F}$  NMR (376 MHz,  $\text{CDCl}_3$ )  $\delta$  -110.3 (ddd,  $J = 111.2$  Hz,  $J = 12.4$  Hz,  $J = 2.8$  Hz, 2 F).  $^{13}\text{C}$  NMR (101 MHz,  $\text{CDCl}_3$ )  $\delta$  148.1, 140.6, 134.5 (td,  $J = 10.4$  Hz,  $J = 5.7$  Hz), 128.1, 124.2, 123.7 (td,  $J = 21.4$  Hz,  $J = 13.0$  Hz), 116.7 (td,  $J = 260.2$  Hz,  $J = 221.1$  Hz), 74.2, 74.1, 24.2, 24.1, 23.8, 23.7. MS (EI):  $m/z$  (%) 363 ( $\text{M}^+$ ), 199, 123 (100). HRMS calcd. for  $\text{C}_{15}\text{H}_{20}\text{F}_2\text{O}_5\text{PN}$  ( $\text{M}^+$ ): 363.1047; Found: 363.1049. IR (thin film)  $\nu_{\text{max}}$  2983, 1517, 1346  $\text{cm}^{-1}$ .

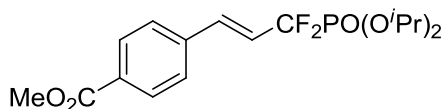

**(E)-methyl 4-(3-(diisopropoxyphosphoryl)-3,3-difluoroprop-1-en-1-yl)benzoate (3h).** The product (79 mg, 70% yield) as a colorless oil was purified with silica gel chromatography (Petroleum ether/EtOAc = 3:1).  $^1\text{H}$  NMR (400 MHz,  $\text{CDCl}_3$ )  $\delta$  8.02 (d,  $J = 8.4$  Hz, 2 H), 7.50 (d,  $J = 8.4$  Hz, 2 H), 7.07 (m, 1 H), 6.38 (m, 1 H), 4.86 (m, 2 H), 3.91 (s, 3 H), 1.36 (d,  $J = 6.4$  Hz, 6 H), 1.33 (d,  $J = 6.4$  Hz, 6 H).  $^{19}\text{F}$  NMR (376 MHz,  $\text{CDCl}_3$ )  $\delta$  -109.9 (ddd,  $J = 112.8$  Hz,  $J = 12.8$  Hz,  $J = 2.6$  Hz, 2 F).  $^{13}\text{C}$  NMR (101 MHz,  $\text{CDCl}_3$ )  $\delta$  166.5, 138.7, 135.7 (td,  $J = 10.4$  Hz,  $J = 6.0$  Hz), 130.7, 130.1, 127.3, 121.6 (td,  $J = 21.2$  Hz,  $J = 13.0$  Hz), 117.0 (td,  $J = 258.1$  Hz,  $J = 220.4$  Hz), 74.0, 73.9, 52.2, 24.2, 24.1, 23.71, 23.67. MS (EI):  $m/z$  (%) 376 ( $\text{M}^+$ ), 334, 292 (100). HRMS calcd. for  $\text{C}_{17}\text{H}_{23}\text{F}_2\text{O}_5\text{P}$  ( $\text{M}^+$ ): 376.1251; Found: 376.1248. IR (thin film)  $\nu_{\text{max}}$  2984, 1723, 1653, 1609  $\text{cm}^{-1}$ .

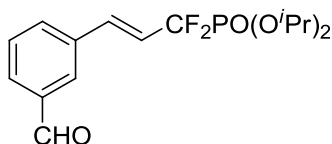

**(E)-diisopropyl (1,1-difluoro-3-(3-formylphenyl)allyl)phosphonate (3i).** The product (78 mg, 75% yield) as a colorless oil was purified with silica gel chromatography (Petroleum ether/EtOAc = 2:1). This compound is known.<sup>1</sup>  $^1\text{H}$  NMR (400 MHz,  $\text{CDCl}_3$ )  $\delta$  10.03 (s, 1 H), 7.95 (s, 1 H), 7.84 (d,  $J = 7.6$  Hz, 1 H), 7.70 (d,  $J = 8.0$  Hz, 1 H), 7.55 (t,  $J = 7.6$  Hz, 1 H), 7.10 (m, 1 H), 6.39 (m, 1 H), 4.87 (m, 2 H), 1.37 (d,  $J = 6.0$  Hz, 6 H), 1.34 (d,  $J = 6.4$  Hz, 6 H).  $^{19}\text{F}$  NMR (376 MHz,  $\text{CDCl}_3$ )  $\delta$  -109.9 (ddd,  $J = 113.0$  Hz,  $J = 12.4$  Hz,  $J = 2.6$  Hz, 2 F).  $^{13}\text{C}$  NMR (101 MHz,  $\text{CDCl}_3$ )  $\delta$  191.8, 136.9, 135.5, 135.3 (td,  $J = 10.4$  Hz,  $J = 6.1$  Hz), 133.0, 130.5, 129.5, 128.1, 121.1 (td,  $J = 21.6$  Hz,  $J = 13.0$  Hz), 116.9 (td,  $J = 259.8$  Hz,  $J = 221.8$  Hz), 74.0, 73.9, 24.14, 24.10, 23.73, 23.67. MS (EI):  $m/z$  (%) 346 ( $\text{M}^+$ ), 262, 222, 133 (100). HRMS calcd. for  $\text{C}_{16}\text{H}_{21}\text{F}_2\text{O}_4\text{P}$  ( $\text{M}^+$ ): 346.1146; Found: 346.1148. IR

(thin film)  $\nu_{\max}$  3487, 2984, 1701, 1654  $\text{cm}^{-1}$ .

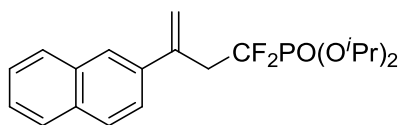

**Diisopropyl (1,1-difluoro-3-phenylbut-3-en-1-yl)phosphonate (3j).** The product (61 mg, 61% yield) was purified with silica gel chromatography (Petroleum ether/EtOAc = 3:1).  $^1\text{H}$  NMR (400 MHz,  $\text{CDCl}_3$ )  $\delta$  7.85-7.78 (m, 4 H), 7.60 (dd,  $J$  = 8.6 Hz,  $J$  = 1.9 Hz, 1 H), 7.49-7.43 (m, 2 H), 5.76 (s, 1 H), 5.42 (s, 1 H), 4.85 (m, 2 H), 3.40 (td,  $J$  = 20.0 Hz,  $J$  = 3.5 Hz, 2 H), 1.36 (d,  $J$  = 6.4 Hz, 6 H), 1.35 (d,  $J$  = 6.8 Hz, 6 H).  $^{19}\text{F}$  NMR (376 MHz,  $\text{CDCl}_3$ )  $\delta$  -111.9 (dt,  $J$  = 107.2 Hz,  $J$  = 19.9 Hz, 2 F).  $^{13}\text{C}$  NMR (101 MHz,  $\text{CDCl}_3$ )  $\delta$  138.3 (t,  $J$  = 2.9 Hz), 138.2, 133.3, 132.8, 128.3, 127.8, 127.5, 126.2, 125.9, 125.1, 124.4, 119.8, 119.3 (td,  $J$  = 261.8 Hz,  $J$  = 217.0 Hz), 73.7, 73.6, 38.7 (td,  $J$  = 20.7 Hz,  $J$  = 15.6 Hz), 24.2, 24.1, 23.8, 23.7. MS (EI):  $m/z$  (%) 382 ( $\text{M}^+$ ), 340, 298 (100). HRMS calcd. for  $\text{C}_{20}\text{H}_{25}\text{F}_2\text{O}_3\text{P}$  ( $\text{M}^+$ ): 382.1509; Found: 382.1515. IR (thin film)  $\nu_{\max}$  3057, 2982, 1623  $\text{cm}^{-1}$ .

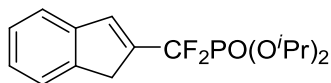

**Diisopropyl (difluoro(1H-inden-2-yl)methyl)phosphonate (3k).** The product (75 mg, 76% yield) as a colorless oil was purified with silica gel chromatography (Petroleum ether/EtOAc = 3:1).  $^1\text{H}$  NMR (400 MHz,  $\text{CDCl}_3$ )  $\delta$  7.49 (d,  $J$  = 13.2 Hz, 1 H), 7.46 (d,  $J$  = 13.2 Hz, 1 H), 7.33-7.26 (m, 2 H), 7.26 (m, 1 H), 4.85 (m, 2 H), 3.69 (s, 2 H), 1.37 (d,  $J$  = 6.0 Hz, 6 H), 1.33 (d,  $J$  = 6.0 Hz, 6 H).  $^{19}\text{F}$  NMR (376 MHz,  $\text{CDCl}_3$ )  $\delta$  -105.6 (dd,  $J$  = 115.4 Hz,  $J$  = 1.9 Hz, 2 F).  $^{13}\text{C}$  NMR (101 MHz,  $\text{CDCl}_3$ )  $\delta$  143.8, 142.7, 138.4 (td,  $J$  = 22.7 Hz,  $J$  = 13.2 Hz), 134.3 (td,  $J$  = 8.3 Hz,  $J$  = 5.5 Hz), 126.7, 126.3, 124.0, 122.4, 117.3 (td,  $J$  = 257.9 Hz,  $J$  = 222.5 Hz), 73.9, 73.8, 38.2, 24.2, 24.1, 23.71, 23.66. MS (EI):  $m/z$  (%) 330 ( $\text{M}^+$ ), 226, 164 (100). HRMS calcd. for  $\text{C}_{16}\text{H}_{21}\text{F}_2\text{O}_3\text{P}$  ( $\text{M}^+$ ): 330.1196; Found: 330.1194. IR (thin film)  $\nu_{\max}$  2983, 1463  $\text{cm}^{-1}$ .

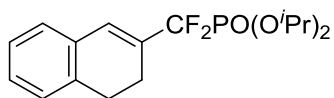

**(E)-Diisopropyl (3-(3,4-dihydronaphthalen-2-yl)-1,1-difluoroallyl)phosphonate (3l).** The product (98 mg, 95% yield) as a colorless oil was purified with silica gel chromatography (Petroleum ether/EtOAc = 3:1).  $^1\text{H}$  NMR (400 MHz,  $\text{CDCl}_3$ )  $\delta$  7.22-7.17 (m, 2 H), 7.16-7.12 (m, 2 H), 6.88 (s, 1 H), 4.86 (m, 2 H), 2.87 (t,  $J = 8.4$  Hz, 2 H), 2.53 (t,  $J = 8.4$  Hz, 2 H), 1.37 (d,  $J = 6.4$  Hz, 6H), 1.34 (d,  $J = 6.0$  Hz, 6 H).  $^{19}\text{F}$  NMR (376 MHz,  $\text{CDCl}_3$ )  $\delta$  -112.1 (d,  $J = 116.3$  Hz, 2 F).  $^{13}\text{C}$  NMR (101 MHz,  $\text{CDCl}_3$ )  $\delta$  135.7, 132.2, 131.4 (td,  $J = 20.1$  Hz,  $J = 12.4$  Hz), 129.2 (td,  $J = 10.3$  Hz,  $J = 6.0$  Hz), 128.6, 127.5, 126.7, 118.1 (td,  $J = 260.1$  Hz,  $J = 219.4$  Hz), 73.7, 73.6, 27.5, 24.21, 24.18, 23.73, 23.68, 21.9. MS (EI):  $m/z$  (%) 344 ( $\text{M}^+$ ), 260, 240, 179 (100). HRMS calcd. for  $\text{C}_{17}\text{H}_{23}\text{F}_2\text{O}_3\text{P}$  ( $\text{M}^+$ ): 344.1353; Found: 344.1355. IR (thin film)  $\nu_{\text{max}}$  2983, 1455, 1387  $\text{cm}^{-1}$ .

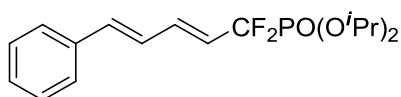

**Diisopropyl ((2E,4E)-1,1-difluoro-5-phenylpenta-2,4-dien-1-yl)phosphonate (3m).** The product (67 mg, 65% yield) as a colorless oil was purified with silica gel chromatography (Petroleum ether/EtOAc = 3:1).  $^1\text{H}$  NMR (400 MHz,  $\text{CDCl}_3$ )  $\delta$  7.42 (d,  $J = 7.2$  Hz, 2 H), 7.33 (t,  $J = 7.2$  Hz, 2 H), 7.29-7.27 (m, 1 H), 6.88-6.73 (m, 3 H), 5.95-5.84 (m, 1 H), 4.86 (m, 2 H), 1.38 (d,  $J = 6.4$  Hz, 6 H), 1.35 (d,  $J = 6.4$  Hz, 6 H).  $^{19}\text{F}$  NMR (376 MHz,  $\text{CDCl}_3$ )  $\delta$  -109.16 (dd,  $J = 114.8$  Hz, 13.7 Hz, 2 F).  $^{13}\text{C}$  NMR (101 MHz,  $\text{CDCl}_3$ )  $\delta$  137.7 (dt,  $J = 2.4$  Hz,  $J = 2.5$  Hz), 136.8 (dt,  $J = 10.8$  Hz,  $J = 6.2$  Hz), 136.1, 128.7, 128.6, 126.9, 126.1 (dt,  $J = 2.3$  Hz,  $J = 2.1$  Hz), 121.9 (td,  $J = 20.9$  Hz,  $J = 12.5$  Hz), 117.1 (td,  $J = 259.1$  Hz,  $J = 222.7$  Hz), 73.8, 73.7, 24.2, 24.1, 23.8, 23.7. MS (EI):  $m/z$  (%) 344 ( $\text{M}^+$ ), 199, 152, 123 (100). HRMS calcd. for  $\text{C}_{17}\text{H}_{23}\text{F}_2\text{O}_3\text{P}$  ( $\text{M}^+$ ): 344.1353; Found: 344.1352. IR (thin film)  $\nu_{\text{max}}$  2984, 1641  $\text{cm}^{-1}$ .

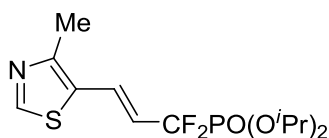

**(E)-Diisopropyl (1,1-difluoro-3-(4-methylthiazol-5-yl)allyl)phosphonate (3n).** The product (46 mg, 45% yield) as a colorless oil was purified with silica gel chromatography (Petroleum

ether/EtOAc = 3:1).  $^1\text{H}$  NMR (400 MHz,  $\text{CDCl}_3$ )  $\delta$  8.66 (s, 1 H), 7.18 (dtd,  $J = 16.1$  Hz,  $J = 3.2$  Hz,  $J = 2.4$  Hz, 1 H), 6.03 (m, 1 H), 4.87 (m, 2 H), 2.51 (s, 3 H), 1.38 (d,  $J = 6.0$  Hz, 6 H), 1.35 (d,  $J = 6.4$  Hz, 6 H).  $^{19}\text{F}$  NMR (376 MHz,  $\text{CDCl}_3$ )  $\delta$  -109.1 (ddd,  $J = 113.3$  Hz,  $J = 12.6$  Hz,  $J = 2.0$  Hz, 2 F).  $^{13}\text{C}$  NMR (101 MHz,  $\text{CDCl}_3$ )  $\delta$  153.7 (d,  $J = 1.3$  Hz), 151.7, 127.9, 126.5 (td,  $J = 11.2$  Hz,  $J = 5.9$  Hz), 120.8 (td,  $J = 21.8$  Hz,  $J = 13.2$  Hz), 116.6 (td,  $J = 260.0$  Hz,  $J = 222.7$  Hz), 74.0, 73.9, 24.15, 24.1, 23.73, 23.68, 15.4. MS (EI):  $m/z$  (%) 339 ( $\text{M}^+$ ), 255, 174 (100). HRMS calcd. for  $\text{C}_{13}\text{H}_{20}\text{F}_2\text{NO}_3\text{PS}$  ( $\text{M}^+$ ): 339.0870; Found: 339.0871. IR (thin film)  $\nu_{\text{max}}$  2984, 1646  $\text{cm}^{-1}$ .

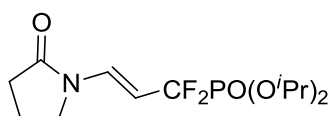

**(E)-Diisopropyl (1,1-difluoro-3-(2-oxopyrrolidin-1-yl)allyl)phosphonate (3o).** The product (74 mg, 76% yield) as a colorless oil was purified with silica gel chromatography (Petroleum ether/EtOAc = 3:1).  $^1\text{H}$  NMR (400 MHz,  $\text{CDCl}_3$ )  $\delta$  7.50 (m, 1 H), 5.05 (m, 1 H), 4.82 (m, 2 H), 3.54 (t,  $J = 7.2$  Hz, 2 H), 2.51 (t,  $J = 8.4$  Hz, 2 H), 2.14 (m, 2 H), 1.34 (d,  $J = 6.4$  Hz, 6 H), 1.32 (d,  $J = 6.0$  Hz, 6 H).  $^{19}\text{F}$  NMR (376 MHz,  $\text{CDCl}_3$ )  $\delta$  -106.6 (ddd,  $J = 117.7$  Hz,  $J = 12.4$  Hz,  $J = 1.9$  Hz, 2 F).  $^{13}\text{C}$  NMR (101 MHz,  $\text{CDCl}_3$ )  $\delta$  173.9, 130.1 (td,  $J = 11.8$  Hz,  $J = 6.2$  Hz), 117.4 (td,  $J = 259.6$  Hz,  $J = 227.1$  Hz), 101.1 (td,  $J = 22.3$  Hz,  $J = 14.2$  Hz), 73.9, 73.8, 44.9, 30.9, 24.10, 24.07, 23.70, 23.65, 17.4. MS (EI):  $m/z$  (%) 325 ( $\text{M}^+$ ), 160 (100). HRMS calcd. for  $\text{C}_{13}\text{H}_{22}\text{F}_2\text{O}_4\text{PN}$  ( $\text{M}^+$ ): 325.1255; Found: 325.1253. IR (thin film)  $\nu_{\text{max}}$  2984, 1723, 1655  $\text{cm}^{-1}$ .

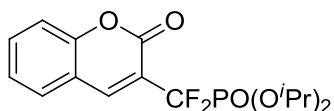

**Diisopropyl (difluoro(2-oxo-2H-chromen-3-yl)methyl)phosphonate (3p).** The product (49 mg, 45% yield) as a colorless oil was purified with silica gel chromatography (Petroleum ether/EtOAc = 2:1).  $^1\text{H}$  NMR (400 MHz,  $\text{CDCl}_3$ )  $\delta$  8.10 (s, 1 H), 7.61 (t,  $J = 7.9$  Hz, 1 H), 7.57 (d,  $J = 7.7$  Hz, 1 H), 7.36-7.30 (m, 2 H), 4.92 (m, 2 H), 1.39 (d,  $J = 5.6$  Hz, 6 H), 1.37 (d,  $J = 5.6$  Hz, 6 H).  $^{19}\text{F}$  NMR (376 MHz,  $\text{CDCl}_3$ )  $\delta$  -108.9 (d,  $J = 109.1$  Hz, 2 F).  $^{13}\text{C}$  NMR (101 MHz,  $\text{CDCl}_3$ )  $\delta$  156.2 (m), 154.5, 143.8 (td,  $J = 8.2$  Hz,  $J = 3.0$  Hz), 133.5, 129.2, 124.8, 120.7 (td,  $J = 22.5$  Hz,  $J = 13.8$  Hz), 117.7, 116.7, 116.1 (td,  $J = 264.3$  Hz,  $J = 219.4$  Hz), 74.7, 74.6, 24.2, 24.1, 23.7, 23.6. MS (EI):  $m/z$  (%) 360 ( $\text{M}^+$ ), 276, 196 (100). HRMS calcd. for  $\text{C}_{16}\text{H}_{19}\text{F}_2\text{O}_5\text{P}$  ( $\text{M}^+$ ): 360.0938; Found: 360.0935. IR (thin film)

$\nu_{\max}$  2984, 1723, 1653, 1609  $\text{cm}^{-1}$ .

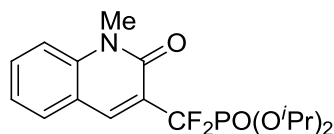

**Diisopropyl (difluoro(1-methyl-2-oxo-1,2-dihydroquinolin-3-yl)methyl)phosphonate (3q).** The product (50 mg, 45%) as a colorless oil was purified with silica gel chromatography (Petroleum ether/EtOAc = 2:1).  $^1\text{H}$  NMR (400 MHz,  $\text{CDCl}_3$ )  $\delta$  8.08 (s, 1 H), 7.65-7.62 (m, 2 H), 7.35 (d,  $J$  = 8.8 Hz, 1 H), 7.24 (m, 1 H), 4.94 (m, 2 H), 3.73 (s, 3 H), 1.38 (d,  $J$  = 6.8 Hz, 6 H), 1.36 (d,  $J$  = 6.8 Hz, 6 H).  $^{19}\text{F}$  NMR (376 MHz,  $\text{CDCl}_3$ )  $\delta$  -107.3 (d,  $J$  = 109.2 Hz, 2 F).  $^{13}\text{C}$  NMR (101 MHz,  $\text{CDCl}_3$ )  $\delta$  158.5 (m), 140.7, 139.1 (td,  $J$  = 8.8 Hz,  $J$  = 3.6 Hz), 132.2, 130.1, 128.1 (td,  $J$  = 10.2 Hz,  $J$  = 6.8 Hz), 122.4, 118.8, 117.2 (td,  $J$  = 263.3 Hz,  $J$  = 217.6 Hz), 114.1, 74.1, 74.0, 29.4, 24.3, 24.2, 23.7, 23.6. MS (EI):  $m/z$  (%) 373 ( $\text{M}^+$ ), 272, 209 (100). HRMS calcd. for  $\text{C}_{17}\text{H}_{22}\text{F}_2\text{O}_4\text{PN}$  ( $\text{M}^+$ ): 373.1255; Found: 373.1253.

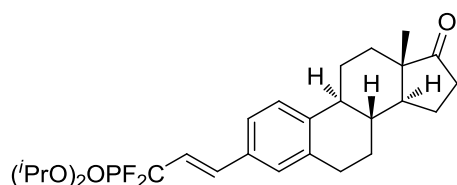

**Diisopropyl((*E*)-1,1-difluoro-3-((8*R*,9*S*,13*S*,14*S*)-13-methyl-17-oxo-7,8,9,11,12,13,14,15,16,17-decahydro-6*H*-cyclopenta[*a*]phenanthren-3-yl)allyl)phosphonate (5).** The product (114 mg, 77% yield) was purified with silica gel chromatography (Petroleum ether/EtOAc = 5:1).  $^1\text{H}$  NMR (400 MHz,  $\text{CDCl}_3$ )  $\delta$  7.28 (d,  $J$  = 7.6 Hz, 1 H), 7.23 (d,  $J$  = 7.6 Hz, 1 H), 7.18 (s, 1 H), 6.99 (m, 1 H), 6.24 (m, 1 H), 4.84 (m, 2 H), 2.91 (m, 2 H), 2.49 (dd,  $J$  = 10.0 Hz, 9.2 Hz, 1 H), 2.42-2.40 (m, 1 H), 2.29 (m, 1 H), 2.18-2.11 (m, 1 H), 2.09-2.01 (m, 2 H), 1.97-1.95 (m, 1 H), 1.65-1.58 (m, 2 H), 1.55-1.47 (m, 3 H), 1.43-1.42 (m, 1 H), 1.35 (d,  $J$  = 6.0 Hz, 6 H), 1.32 (d,  $J$  = 6.0 Hz, 6 H).  $^{19}\text{F}$  NMR (376 MHz,  $\text{CDCl}_3$ )  $\delta$  -109.1 (ddd,  $J$  = 114.8 Hz,  $J$  = 12.8 Hz,  $J$  = 1.9 Hz, 2 F).  $^{13}\text{C}$  NMR (101 MHz,  $\text{CDCl}_3$ )  $\delta$  220.7, 141.4, 137.0, 136.6 (td,  $J$  = 10.3 Hz,  $J$  = 6.1 Hz), 132.5, 128.1, 125.8, 124.8, 118.3 (td,  $J$  = 21.1 Hz,  $J$  = 12.8 Hz), 117.4 (td,  $J$  = 257.8 Hz,  $J$  = 221.5 Hz), 73.8, 73.7, 50.5, 47.9, 44.5, 38.0, 35.8, 31.6, 29.3, 26.3, 25.7, 24.2, 24.1, 23.8, 23.7, 21.6, 13.8. IR (thin film)  $\nu_{\max}$  2982, 2933, 1739, 1653  $\text{cm}^{-1}$ . MS (EI):  $m/z$  (%) 494 ( $\text{M}^+$ ), 401, 329 (100). HRMS calcd. for  $\text{C}_{27}\text{H}_{37}\text{O}_4\text{F}_2\text{P}$ :

**Inhibition Experiments for Pd-Catalyzed Cross-Coupling of 1c with 2a.**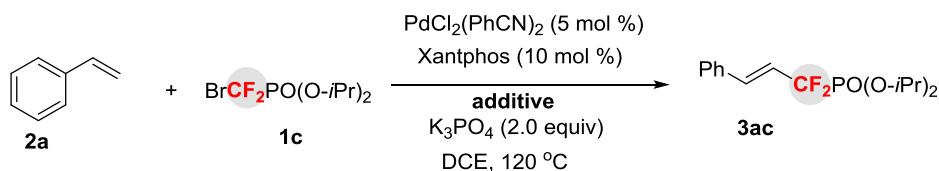

| Entry | Additive (equiv)         | <b>3ac</b> Yield(%) <sup>a</sup> |
|-------|--------------------------|----------------------------------|
| 1     | Hydroquinone (0.2)       | 33                               |
| 2     | 1,4-dinitrobenzene (0.2) | 38                               |
| 3     | none                     | (92)                             |

**General Procedure:** To a 25 mL of Schlenk tube were added  $\text{PdCl}_2(\text{MeCN})_2$  (5 mol %), Xantphos (10 mol %), additive (0.2 equiv) under air, followed by  $\text{K}_3\text{PO}_4$  (2.0 equiv). The mixture was then evacuated and backfilled with  $\text{N}_2$  (3 times). Bromodifluoromethylphosphonate **1c** (2 equiv), styrene **2a** (0.3 mmol) and fresh distilled DCE (2 mL) were added subsequently. The reaction mixture was heated to 120 °C (oil bath). After stirring for 12 h, the reaction was cooled to room temperature and fluorobenzene (0.3 mmol) was added. The yield was determined by  $^{19}\text{F}$  NMR.

**Mechanistic Studies**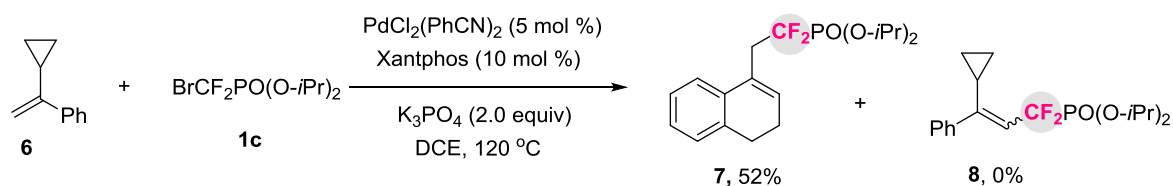

To a 25 mL of Schlenk tube were added  $\text{PdCl}_2(\text{PhCN})_2$  (5 mol %), Xantphos (10 mol %) under air, followed by  $\text{K}_3\text{PO}_4$  (2.0 equiv). The mixture was then evacuated and backfilled with  $\text{N}_2$  (3 times). Bromodifluoromethylphosphonate **1c** (2 equiv), alkene **6** (0.3 mmol) and fresh distilled DCE (2 mL) were added subsequently. The reaction mixture was heated to 120 °C (oil bath). After stirring for 12 h, the reaction was cooled to room temperature. The reaction mixture was diluted with EtOAc and filtered with a pad of celite. The filtrate was concentrated, and the residue was purified with silica

gel chromatography (Petroleum ether/EtOAc = 3:1) to compound **7** (56 mg, 52% yield) as a colorless oil was purified with silica gel chromatography (Petroleum ether/EtOAc = 2:1).  $^1\text{H}$  NMR (400 MHz,  $\text{CDCl}_3$ )  $\delta$  7.26-7.24 (m, 1 H), 7.19-7.15 (m, 1 H), 7.12-7.10 (m, 2 H), 6.09 (t,  $J$  = 4.4 Hz, 1 H), 4.92-4.81 (m, 2 H), 3.21 (td,  $J$  = 20.4 Hz,  $J$  = 3.2 Hz, 2 H), 2.76 (t,  $J$  = 8.2 Hz, 2 H), 2.34-2.29 (m, 2 H), 1.36 (d,  $J$  = 6.4 Hz, 6 H), 1.35 (d,  $J$  = 6.4 Hz, 6 H).  $^{19}\text{F}$  NMR (376 MHz,  $\text{CDCl}_3$ )  $\delta$  -111.9 (dt,  $J$  = 108.7 Hz,  $J$  = 20.0 Hz, 2 F).  $^{13}\text{C}$  NMR (101.0 MHz,  $\text{CDCl}_3$ )  $\delta$  136.1, 134.6, 132.1, 127.4, 126.9, 126.2, 123.3 (t,  $J$  = 3.1 Hz), 119.3 (td,  $J$  = 262.3 Hz,  $J$  = 217.6 Hz), 73.63, 73.56, 36.1 (dt,  $J$  = 21.1 Hz,  $J$  = 15.6 Hz), 28.0, 24.10, 24.06, 23.73, 23.68, 23.3. IR (thin film)  $\nu_{\text{max}}$  1239  $\text{cm}^{-1}$  (P=O). MS (EI):  $m/z$  (%) 358 ( $\text{M}^+$ ), 274 (100). HRMS: Calculated for  $\text{C}_{18}\text{H}_{25}\text{F}_2\text{O}_3\text{P}$ : 358.1509; Found: 358.1506.

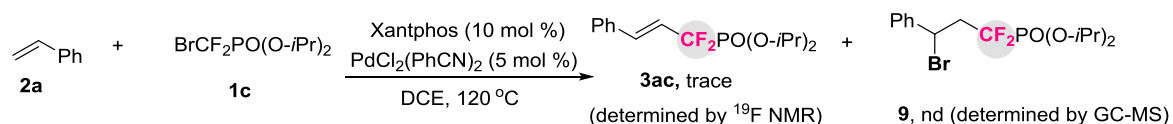

To a 25 mL of Schlenk tube were added  $\text{PdCl}_2(\text{PhCN})_2$  (5 mol %), Xantphos (10 mol %) under air. The mixture was then evacuated and backfilled with  $\text{N}_2$  (3 times). Bromodifluoromethylphosphonate **1c** (2 equiv), alkene **2a** (0.3 mmol) and fresh distilled DCE (2 mL) were added subsequently. The reaction mixture was heated to 120 °C (oil bath). After stirring for 12 h, the reaction was cooled to room temperature, and fluorobenzene (0.3 mmol) was added. The yield was determined by  $^{19}\text{F}$  NMR.

**(*E*)-Diisopropyl (1,1-difluoro-3-phenylallyl)phosphonate (3ac).**

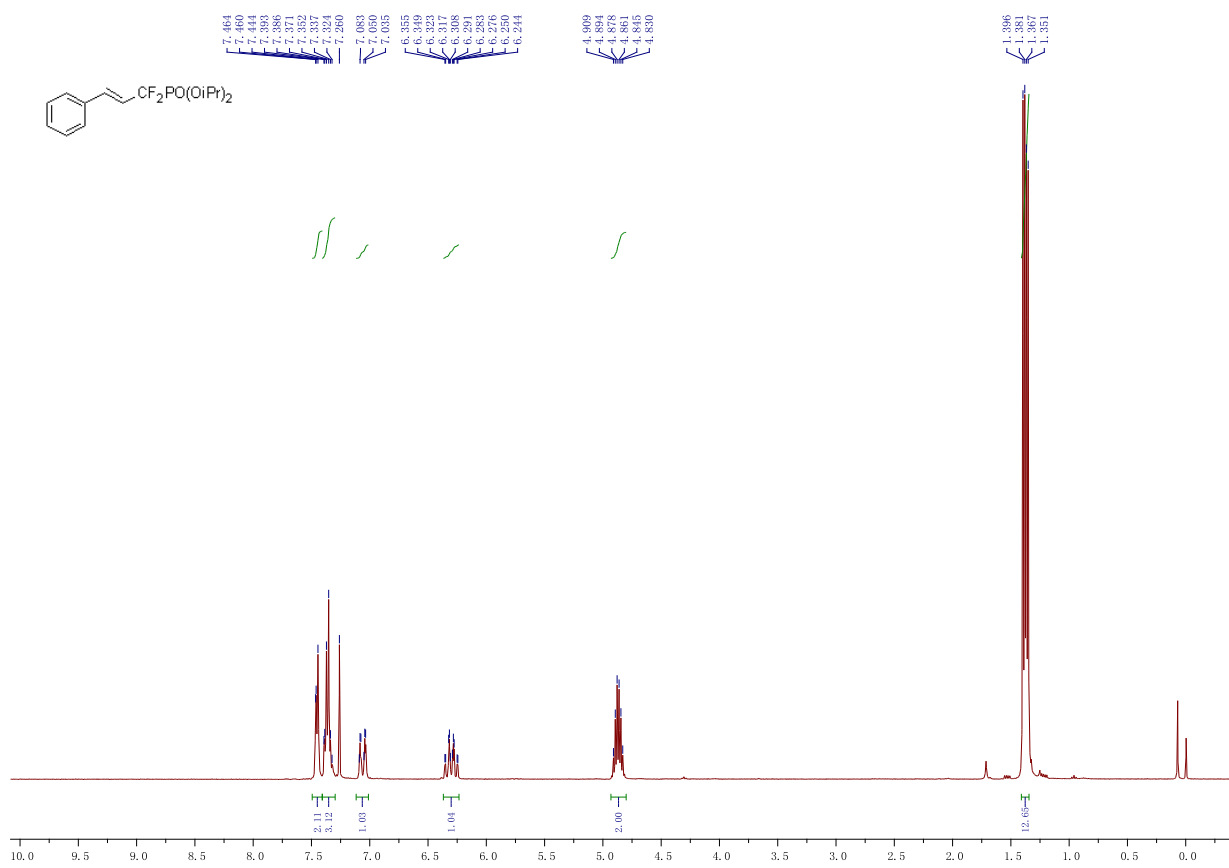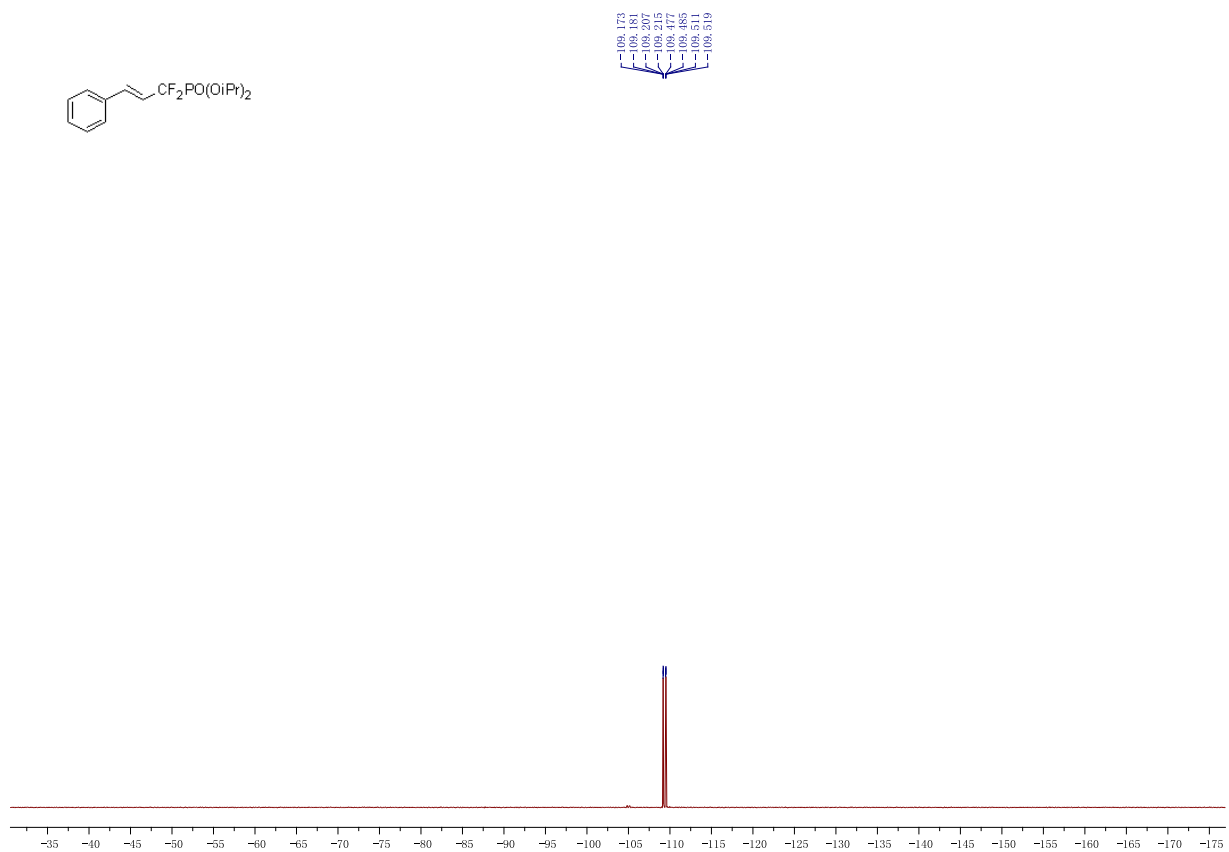



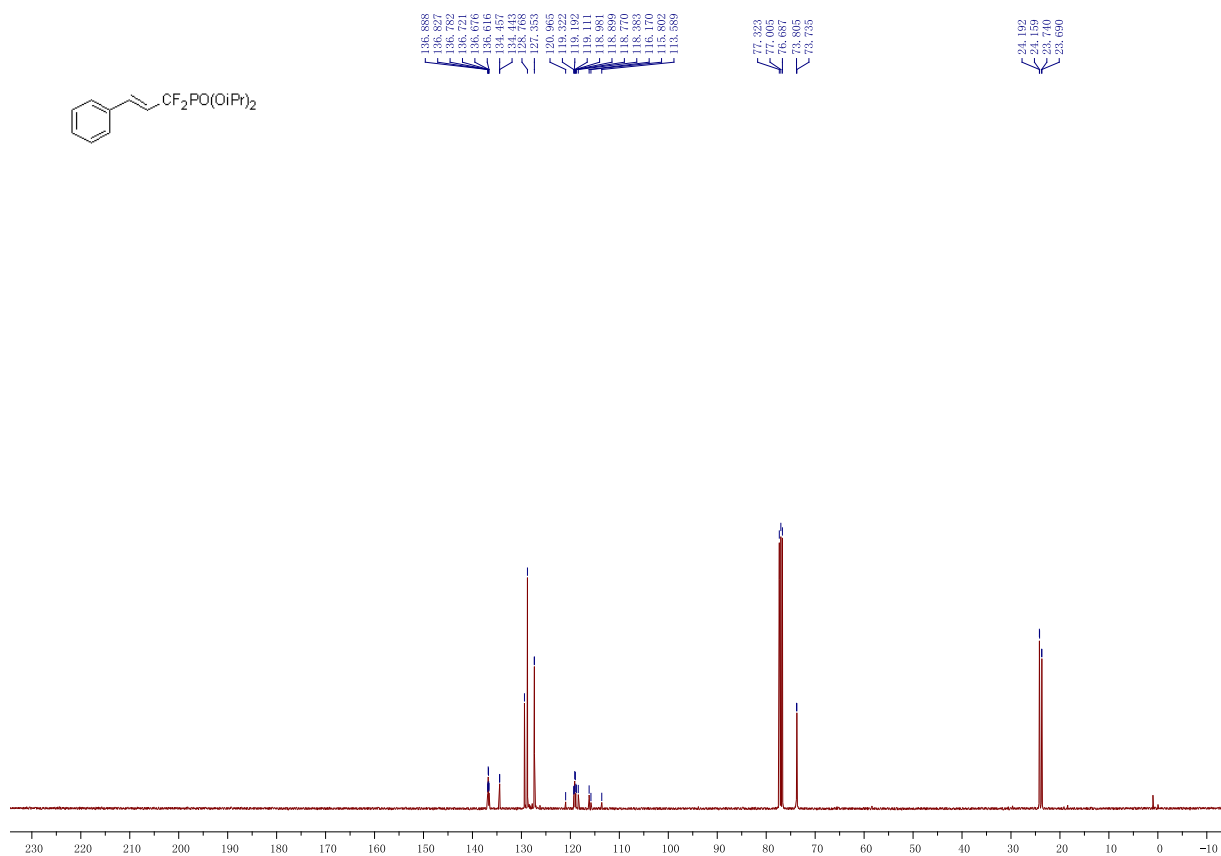

**(*E*)-Diisopropyl (1,1-difluoro-3-(naphthalen-2-yl)allyl)phosphonate (3b).**

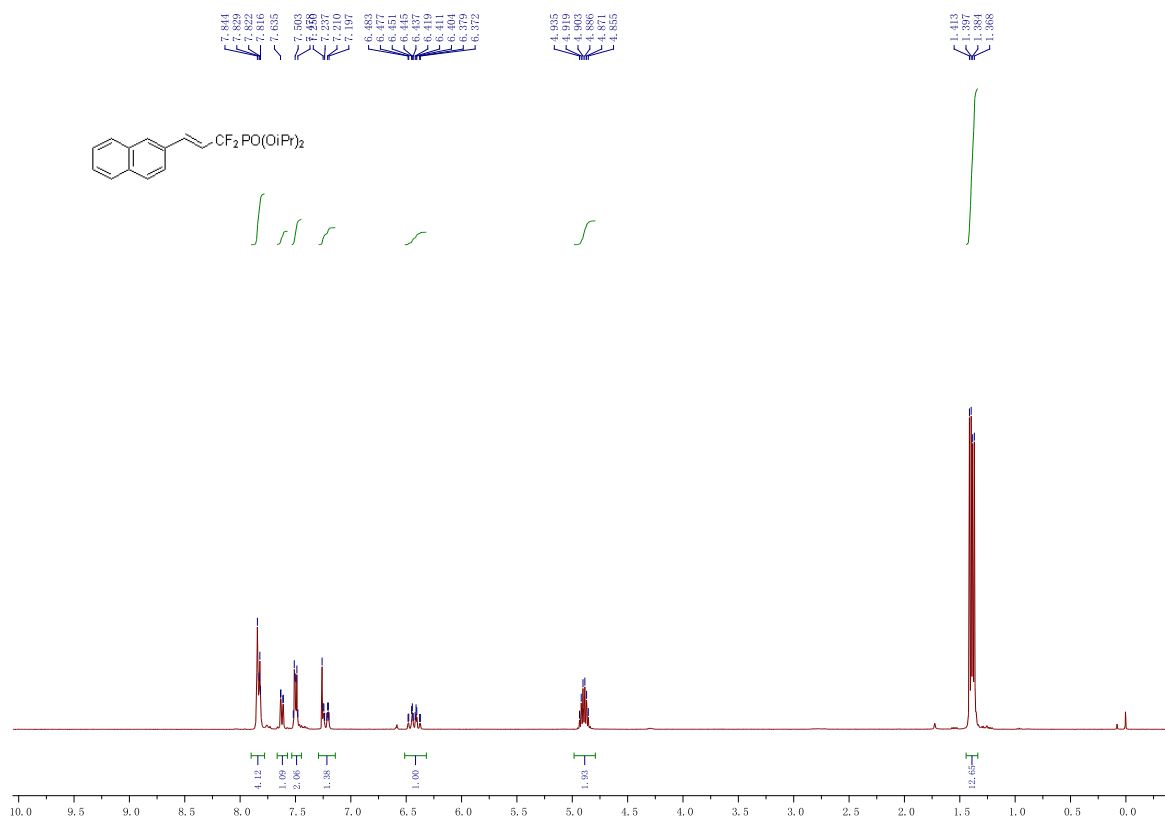

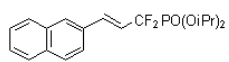

109.094  
109.042  
109.068  
109.076  
109.338  
109.372  
109.380

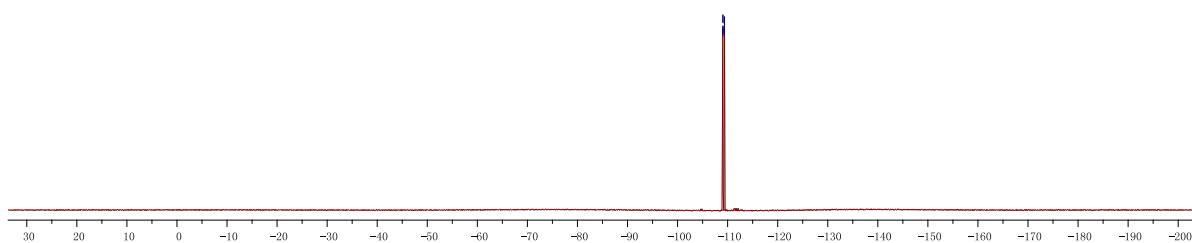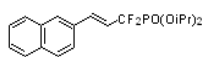

136.990  
136.829  
136.827  
136.827  
136.781  
136.720  
136.660  
133.340  
131.957  
128.596  
119.586  
119.457  
119.375  
119.246  
119.066  
119.036  
118.889  
118.518  
116.310  
77.334  
77.017  
76.805  
73.891  
73.791  
24.227  
23.714  
23.782  
23.731

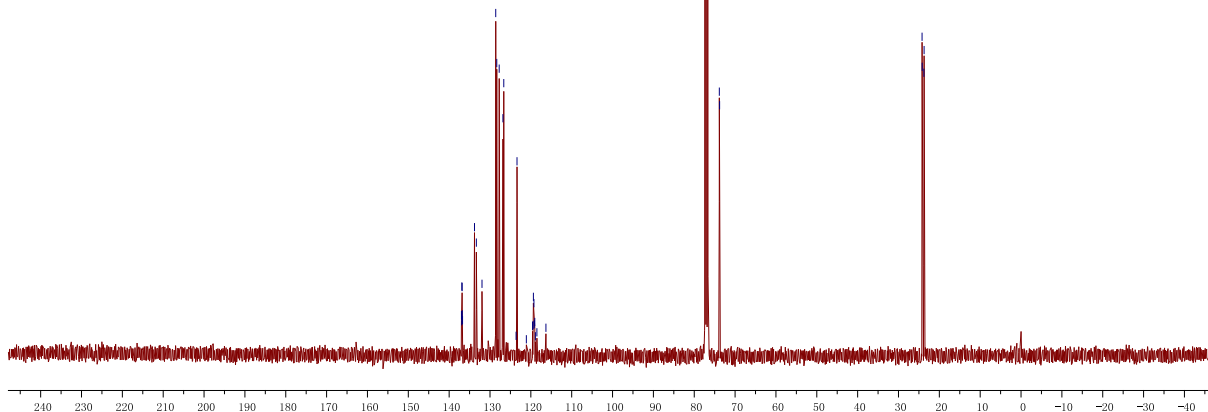

**(*E*)-diisopropyl (3-(4-(*tert*-butyl)phenyl)-1,1-difluoroallyl)phosphonate (3c).**

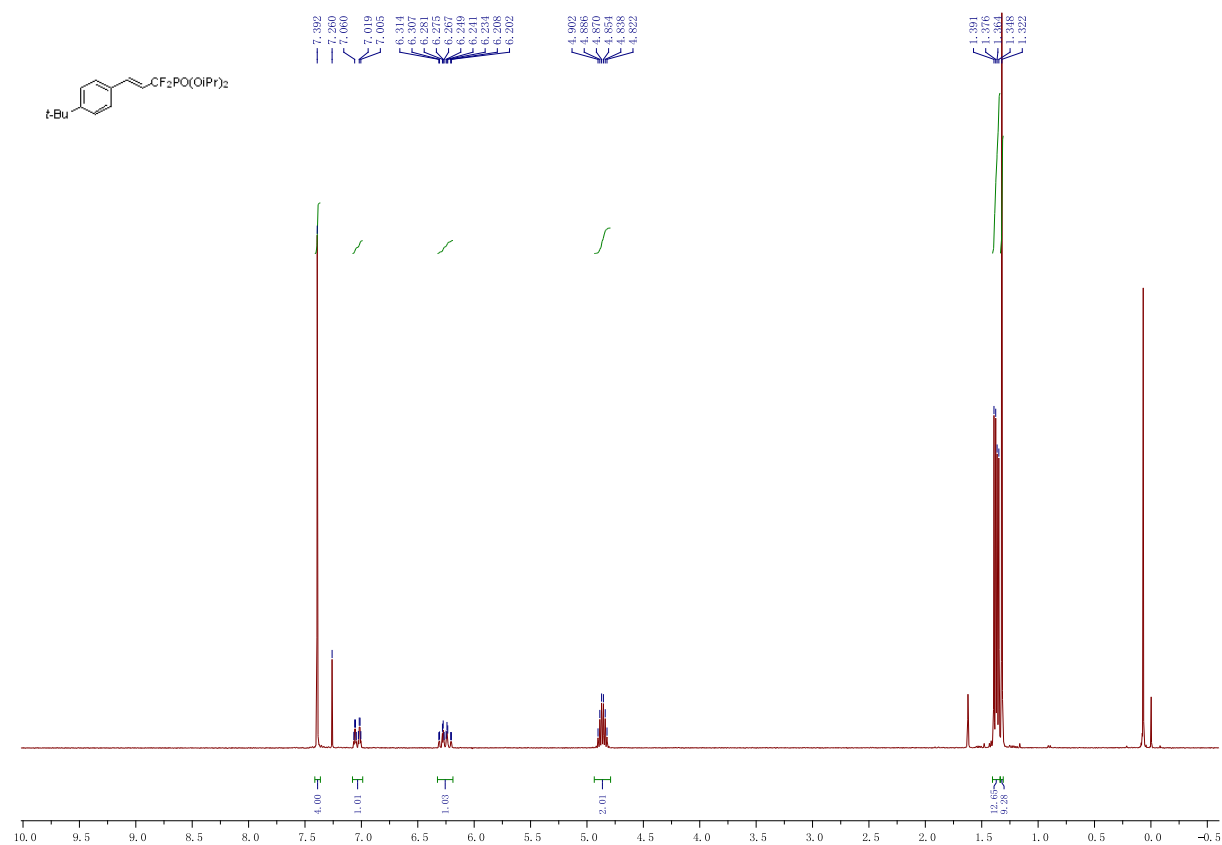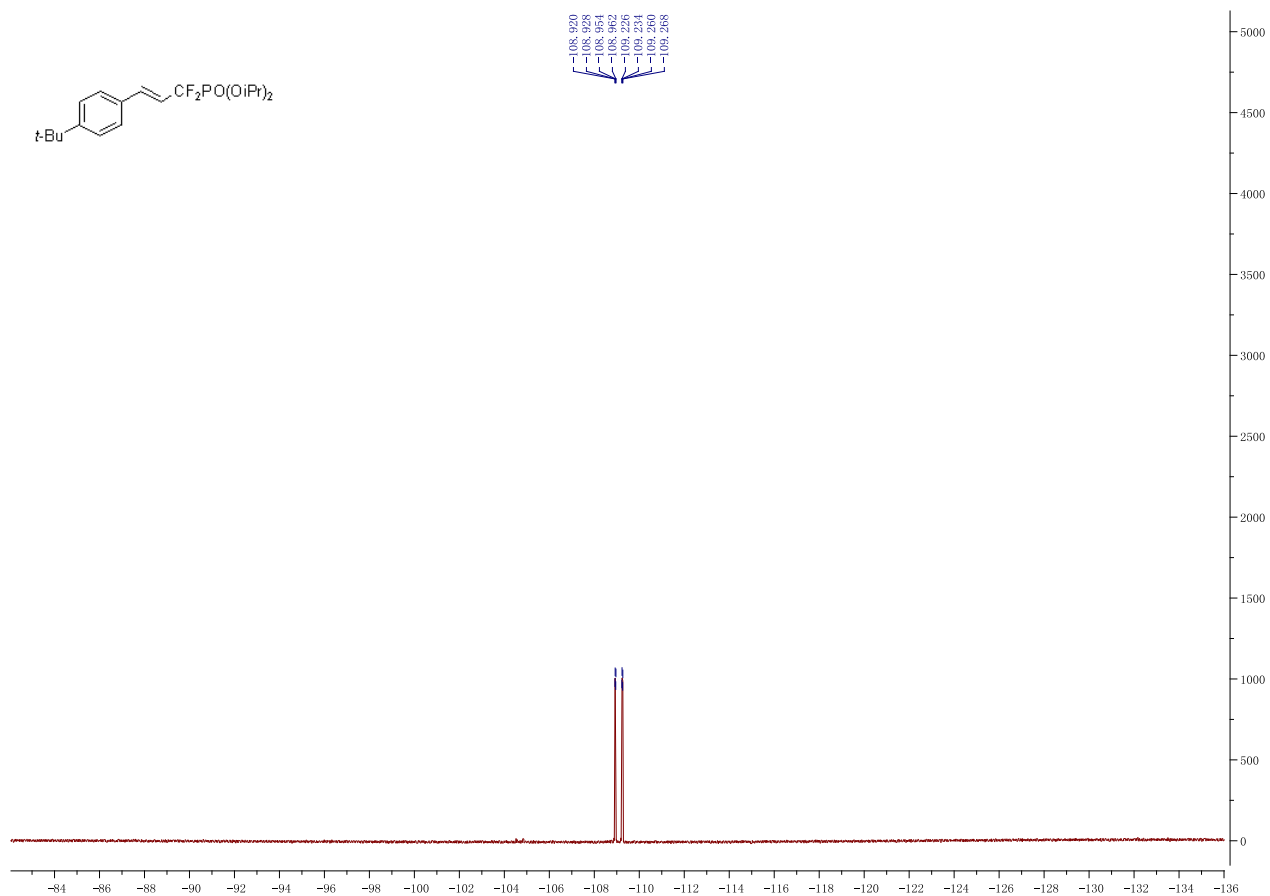

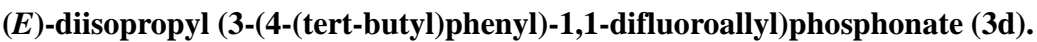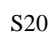

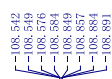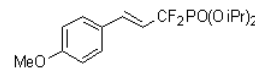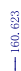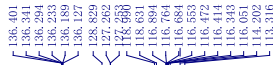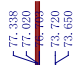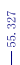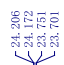

**(*E*)-Diisopropyl (3-(4-(diphenylamino)phenyl)-1,1-difluoroallyl)phosphonate (3e).**

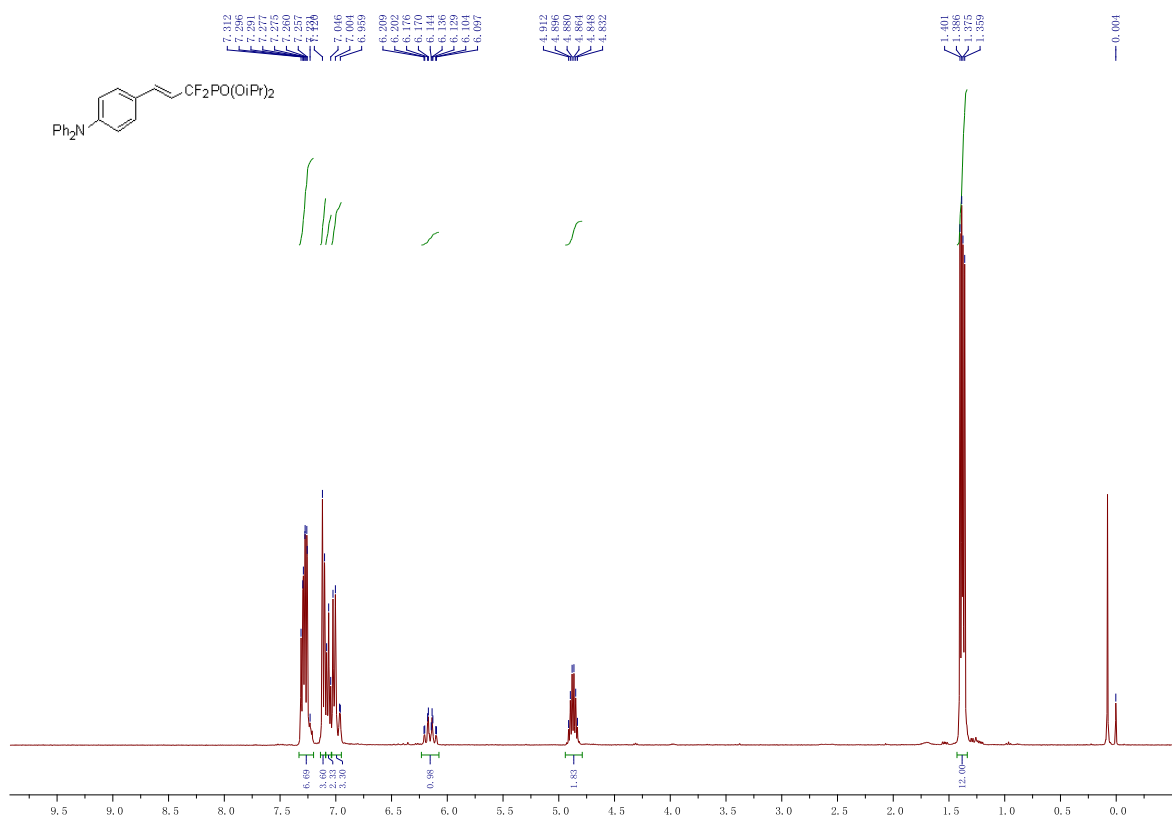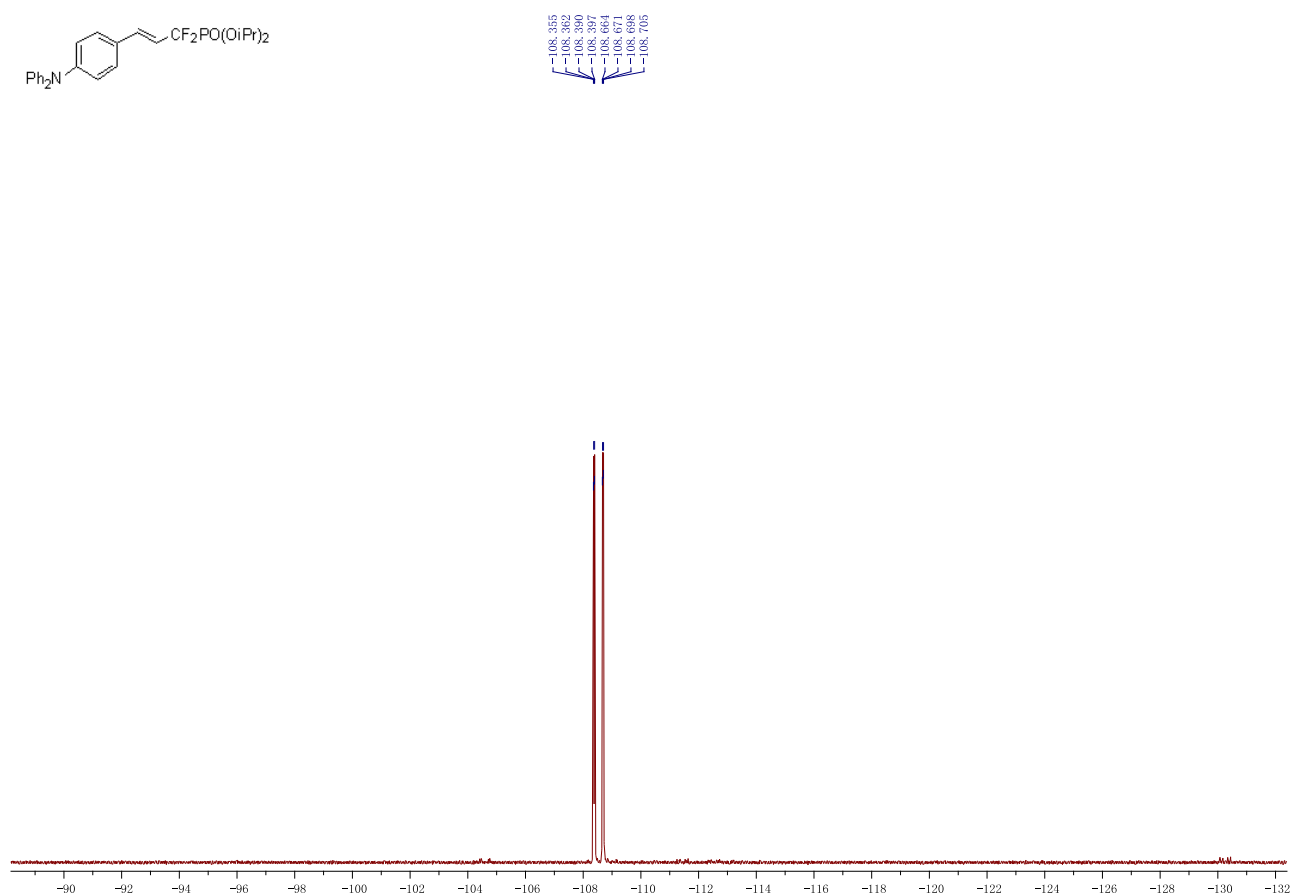

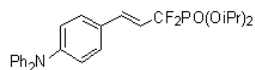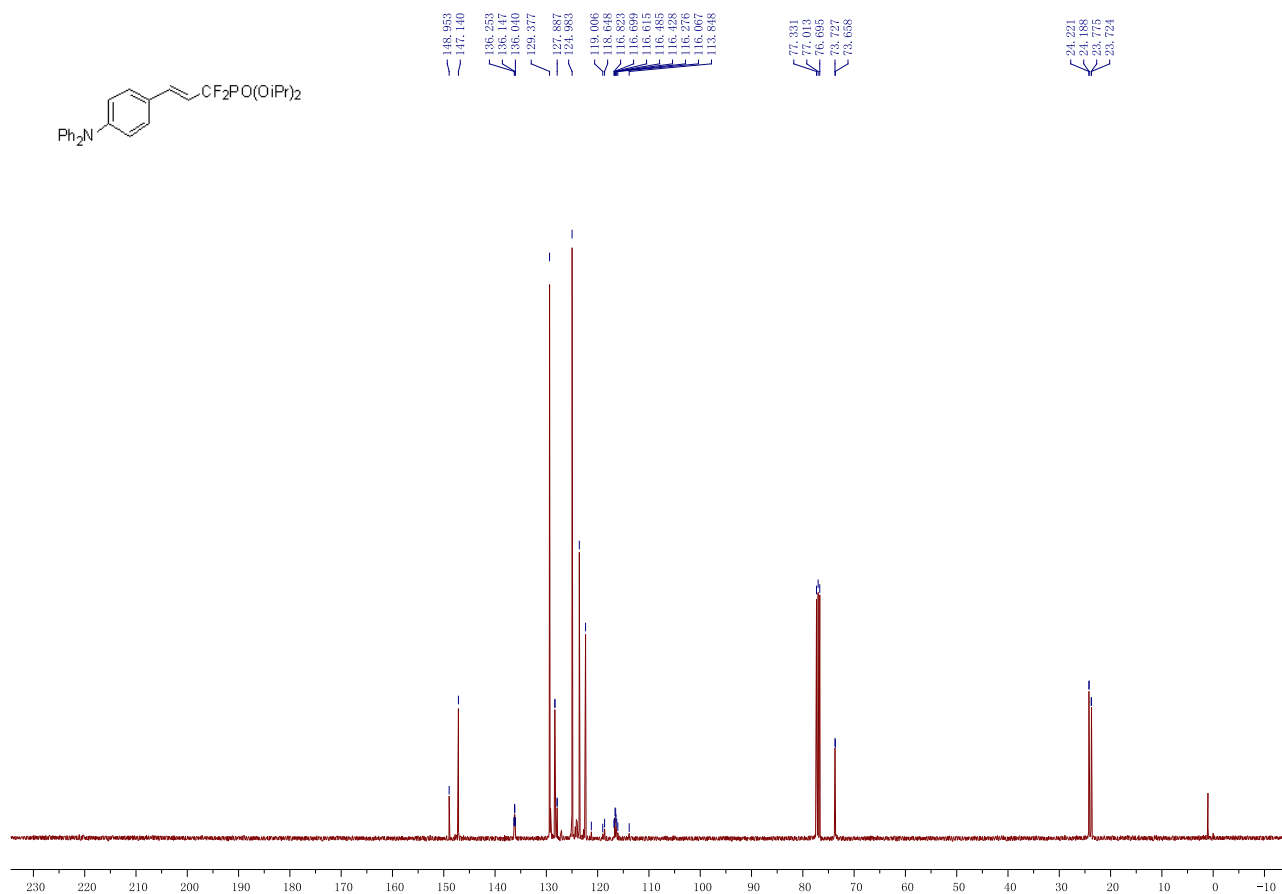

**(E)-Diisopropyl (3-(4-cyanophenyl)-1,1-difluoroallyl)phosphonate (3f).**

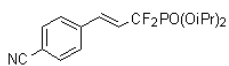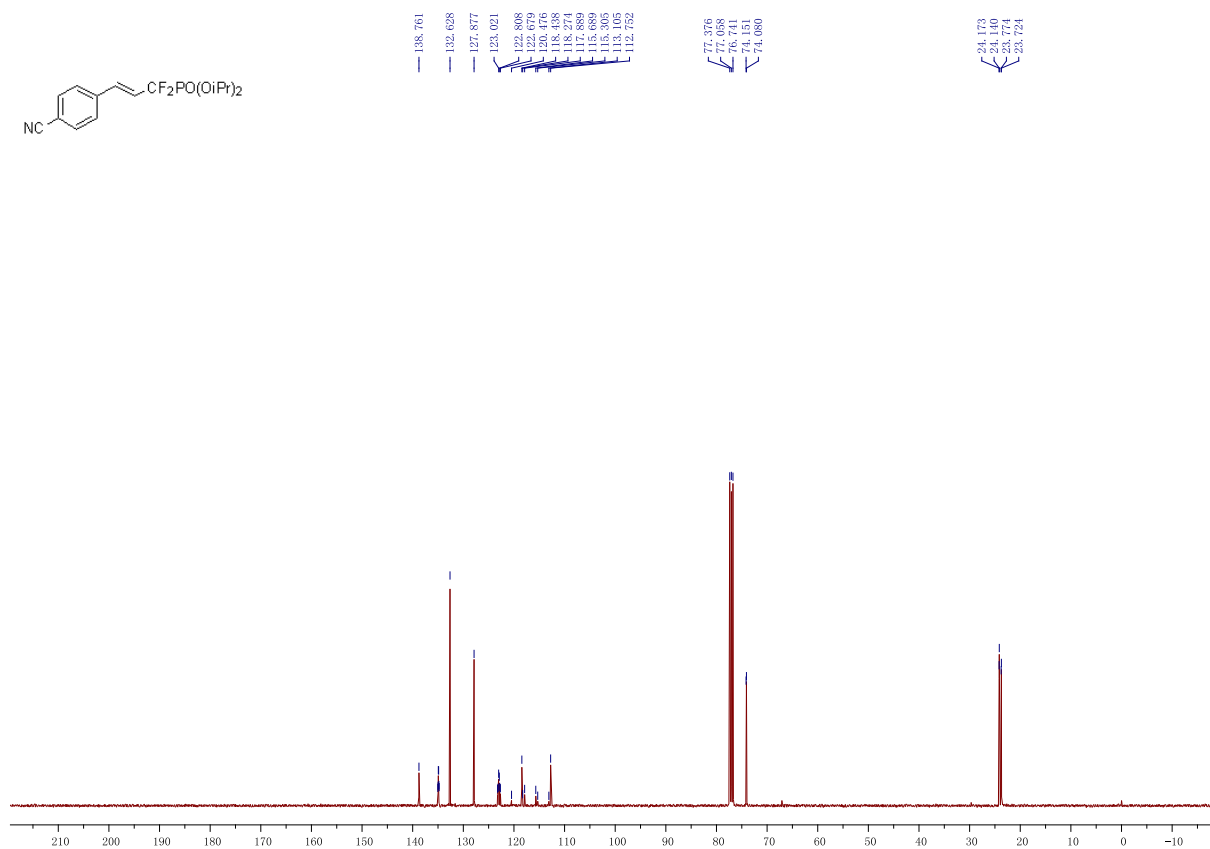

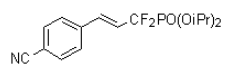

10.106  
 10.113  
 10.110  
 10.140  
 10.146  
 10.403  
 10.410  
 10.405  
 10.443

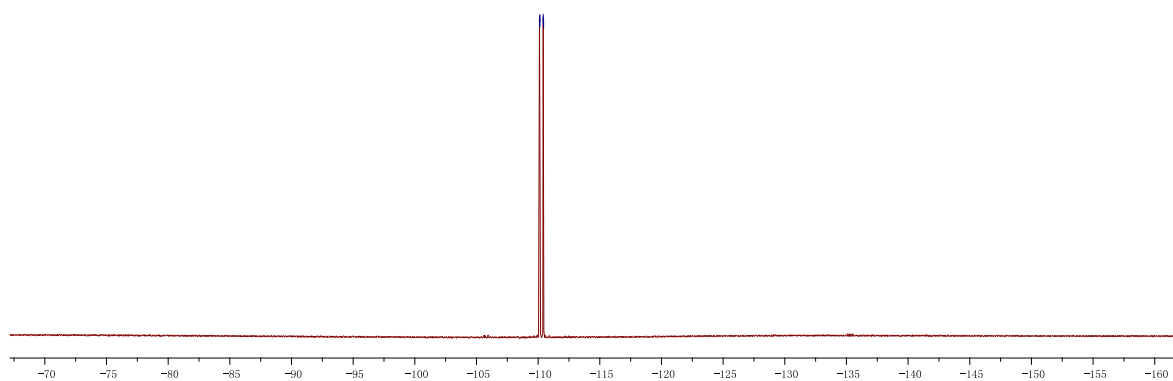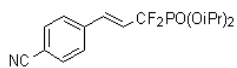

7.667  
 7.646  
 7.544  
 7.524

7.260

7.067

7.026

6.451

6.446

6.420

6.414

6.388

6.374

6.348

6.343

4.903

4.887

4.872

4.856

4.840

4.824

1.390

1.375

1.360

1.345

]]

]

]

]

]

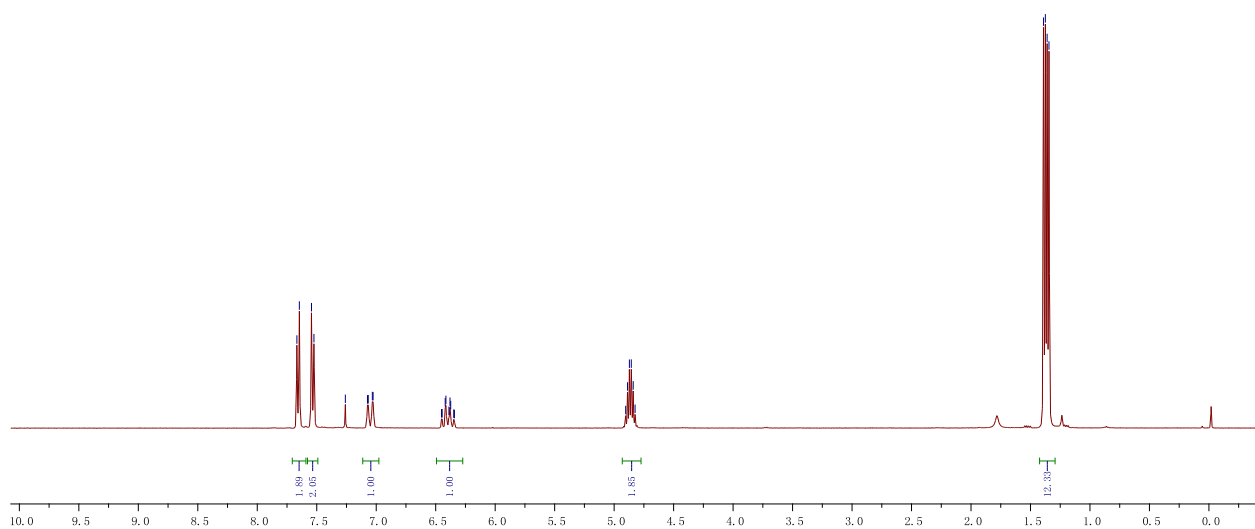



**(*E*)-Diisopropyl (1,1-difluoro-3-(4-nitrophenyl)allyl)phosphonate (3g).**

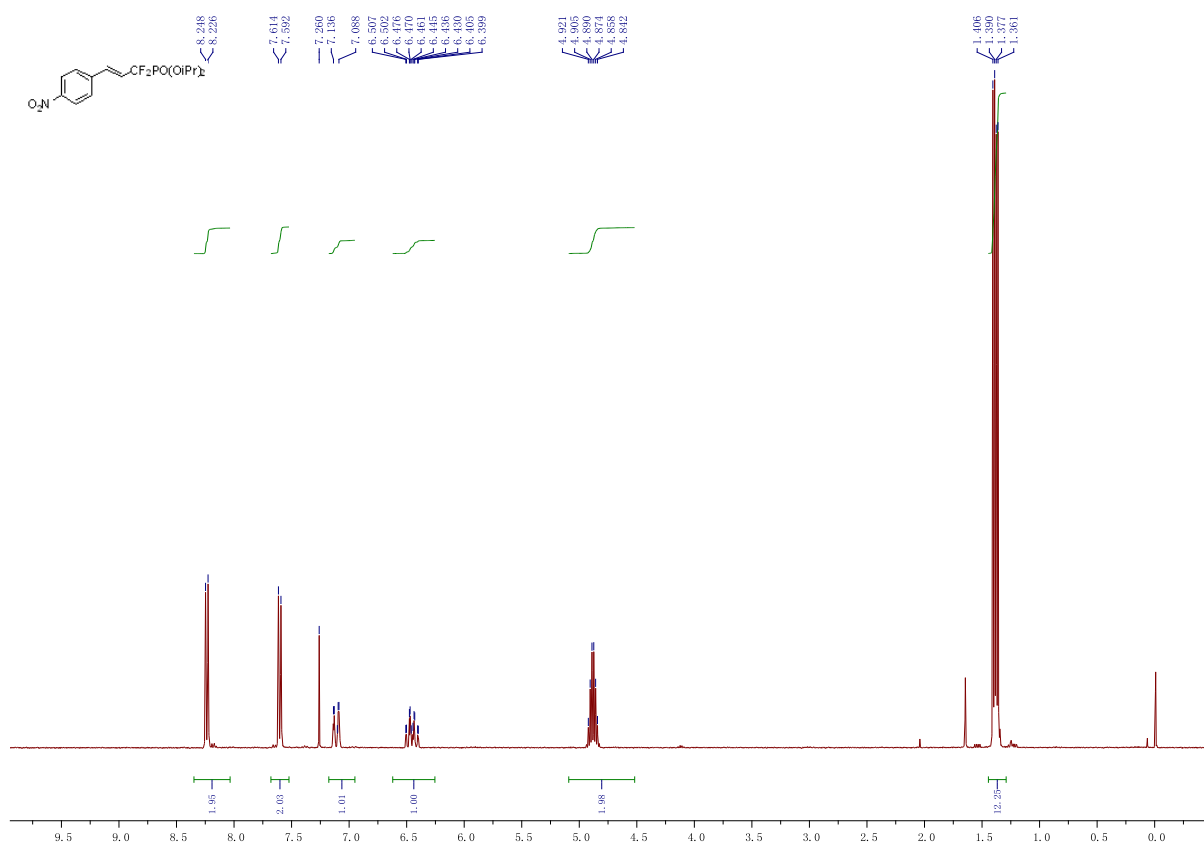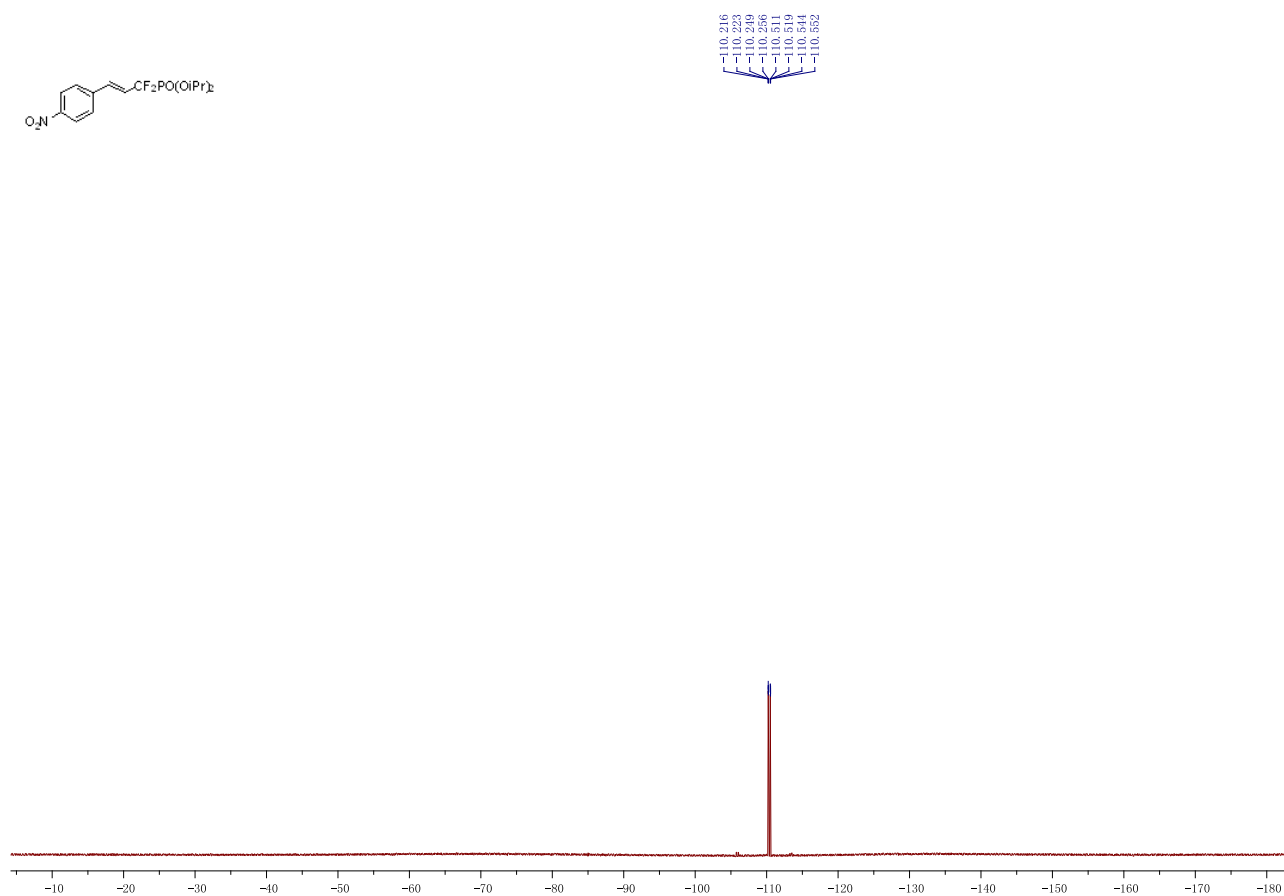

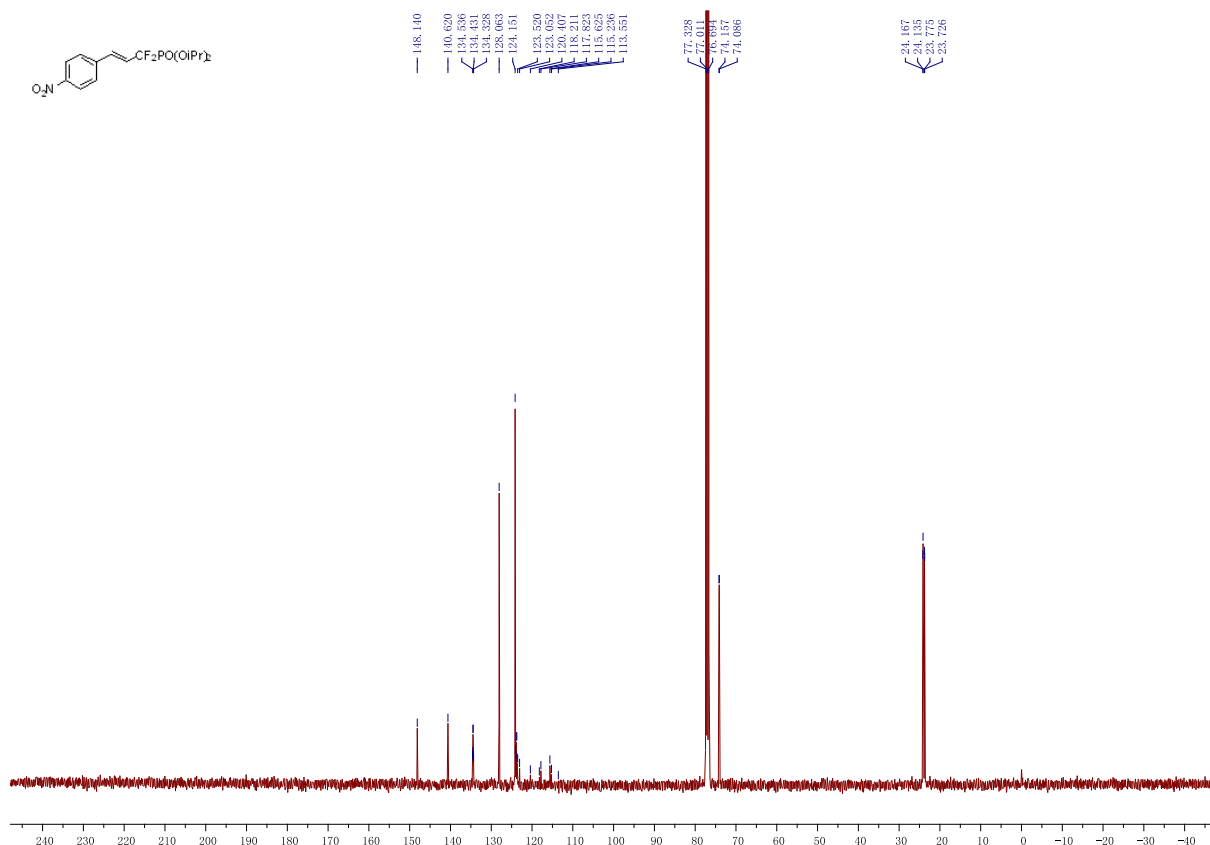

**(*E*)-methyl 4-(3-(diisopropoxyphosphoryl)-3,3-difluoroprop-1-en-1-yl)benzoate (3h).**

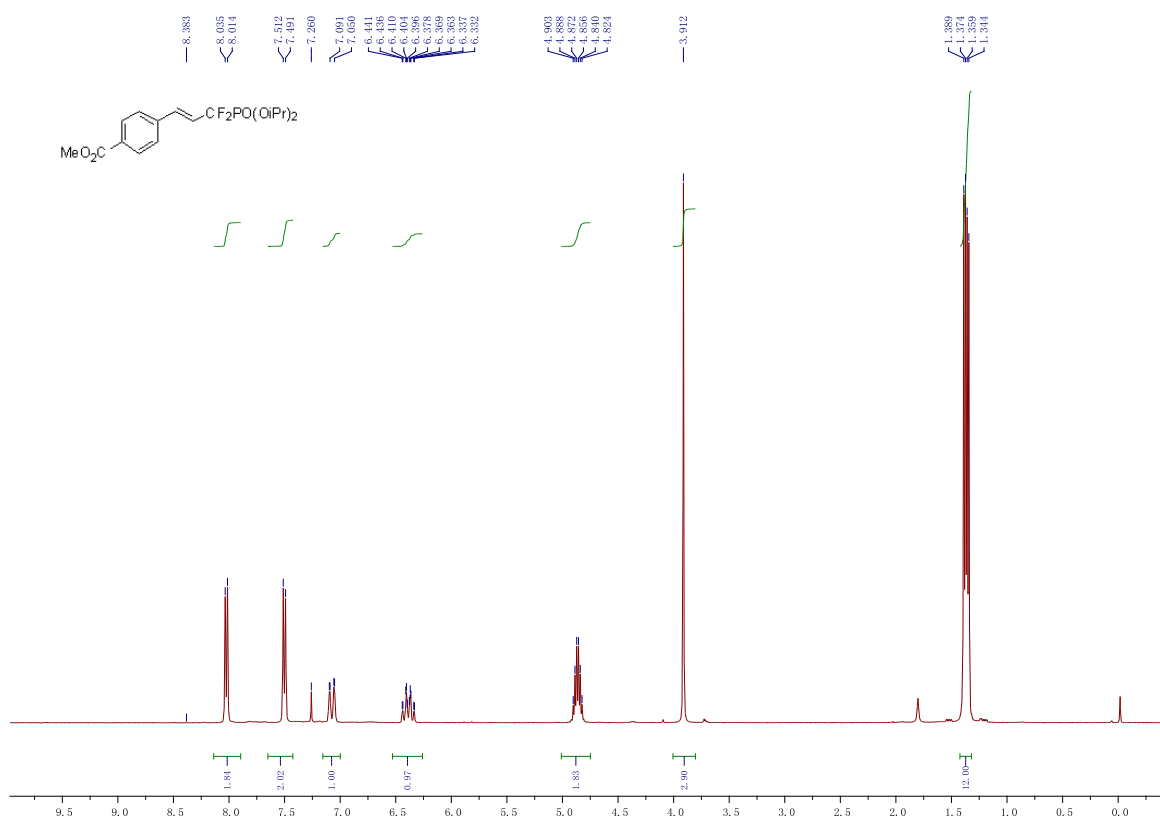

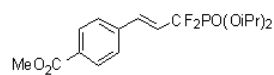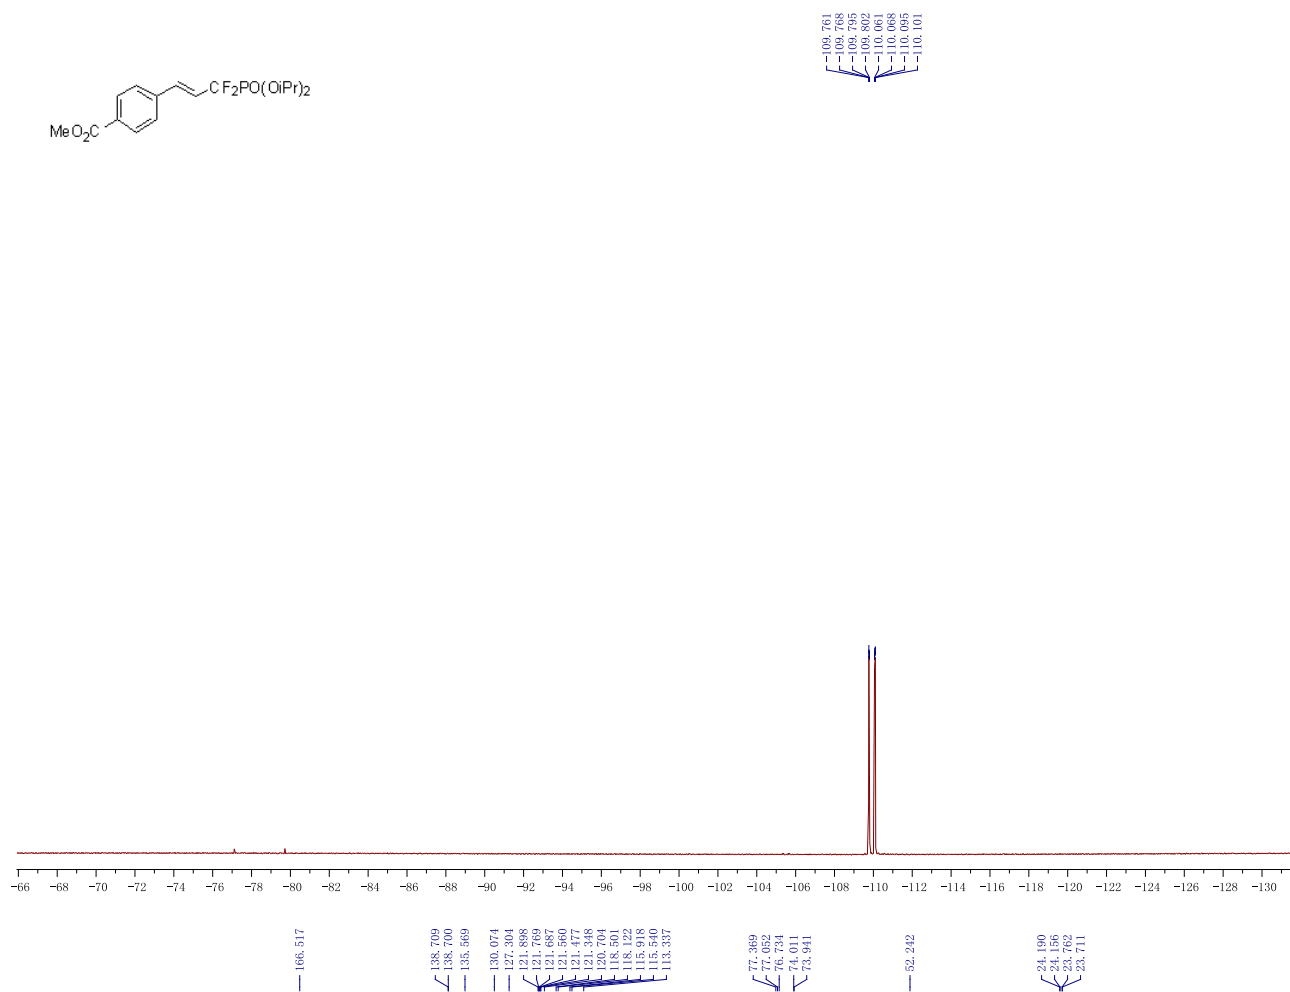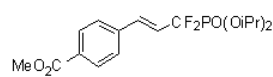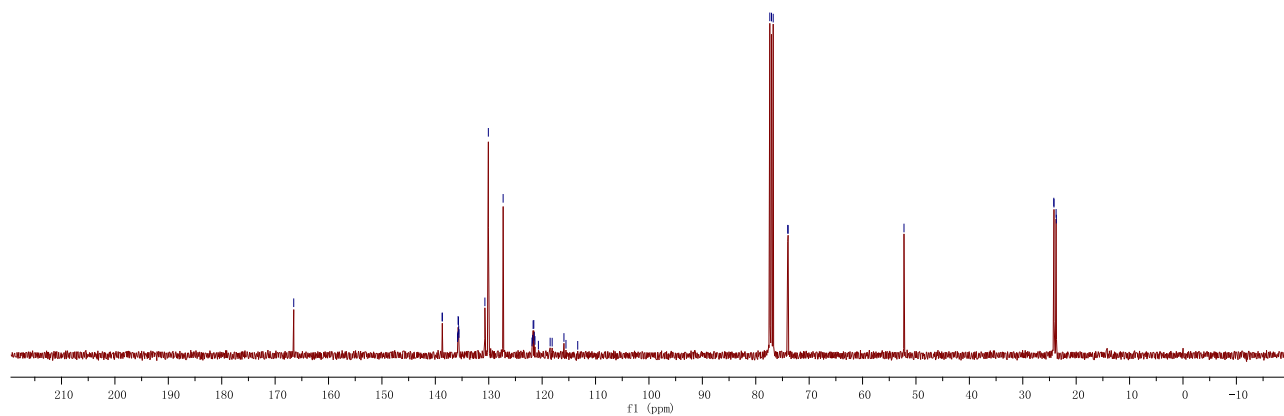

**(*E*)-diisopropyl (1,1-difluoro-3-(3-formylphenyl)allyl)phosphonate (3i)**

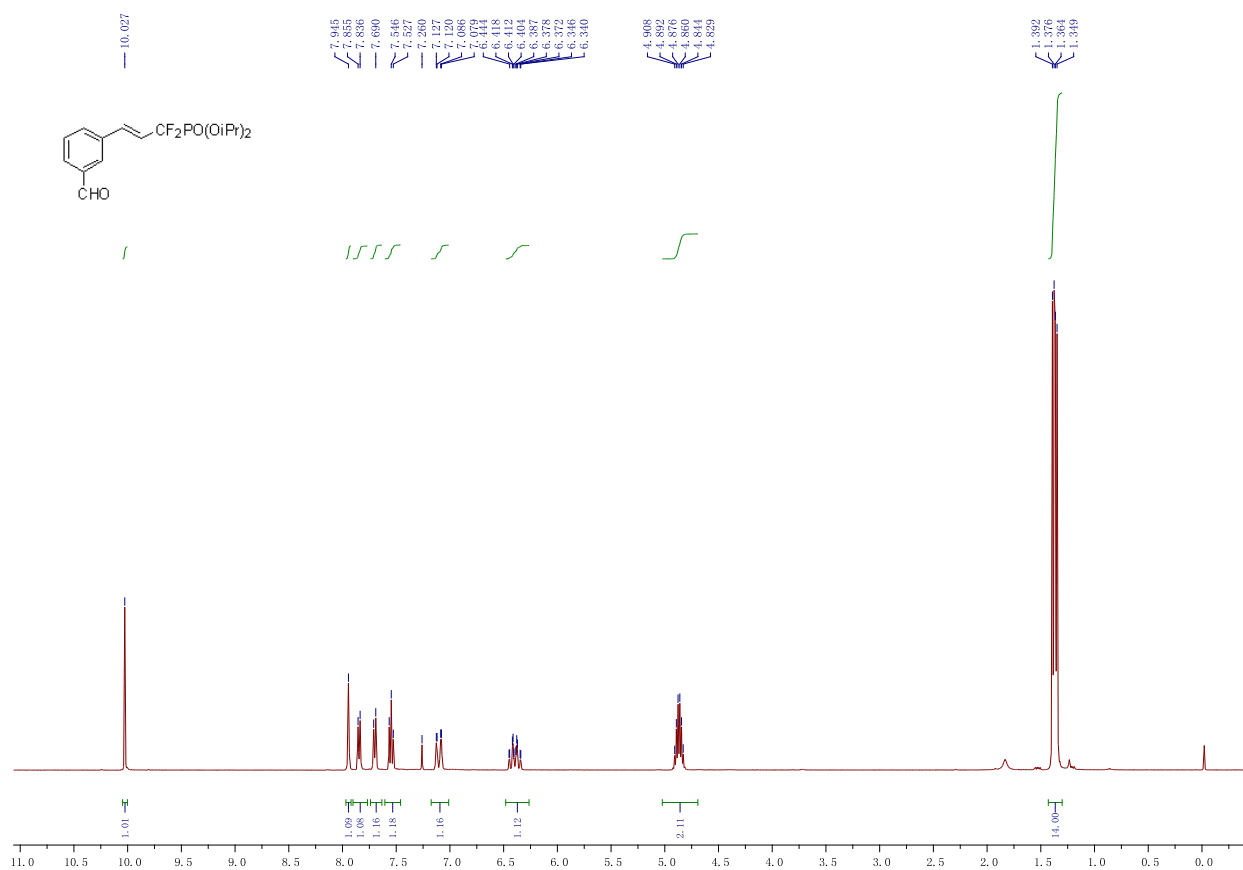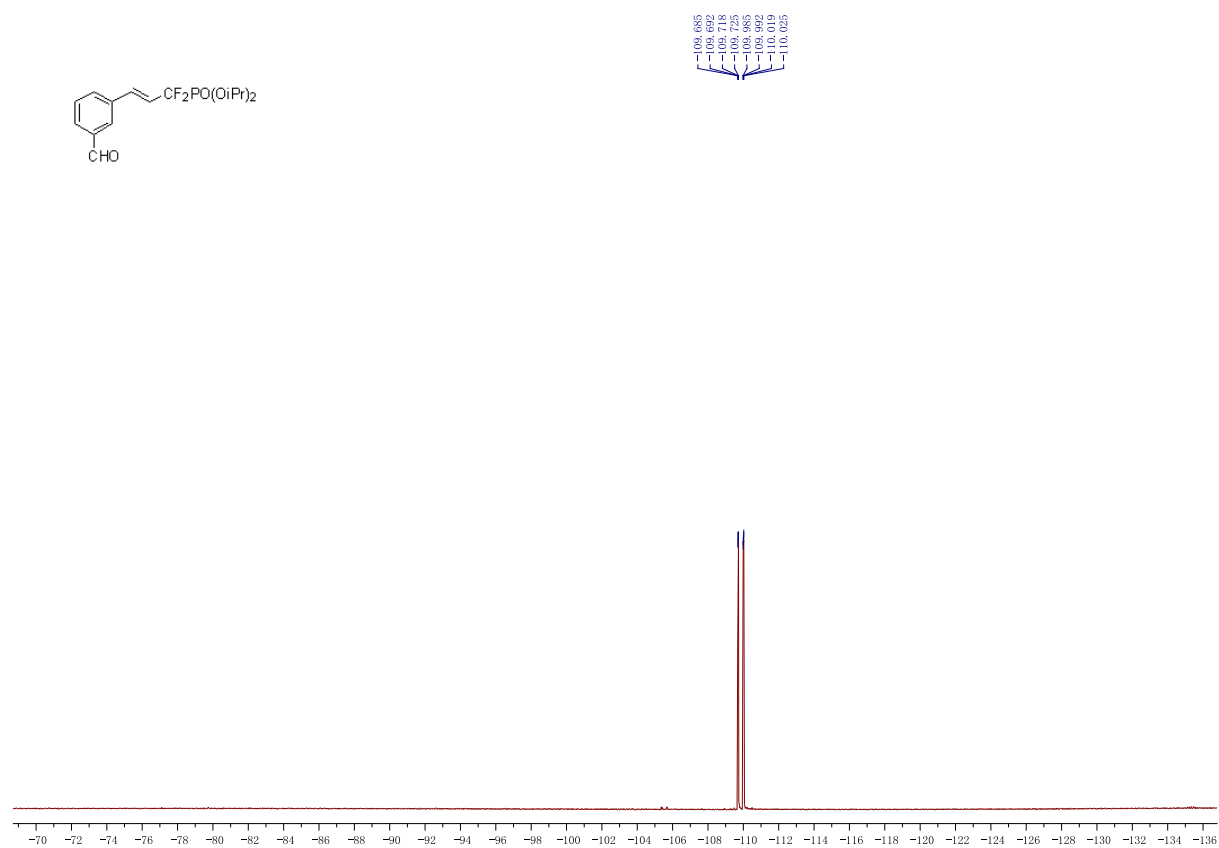

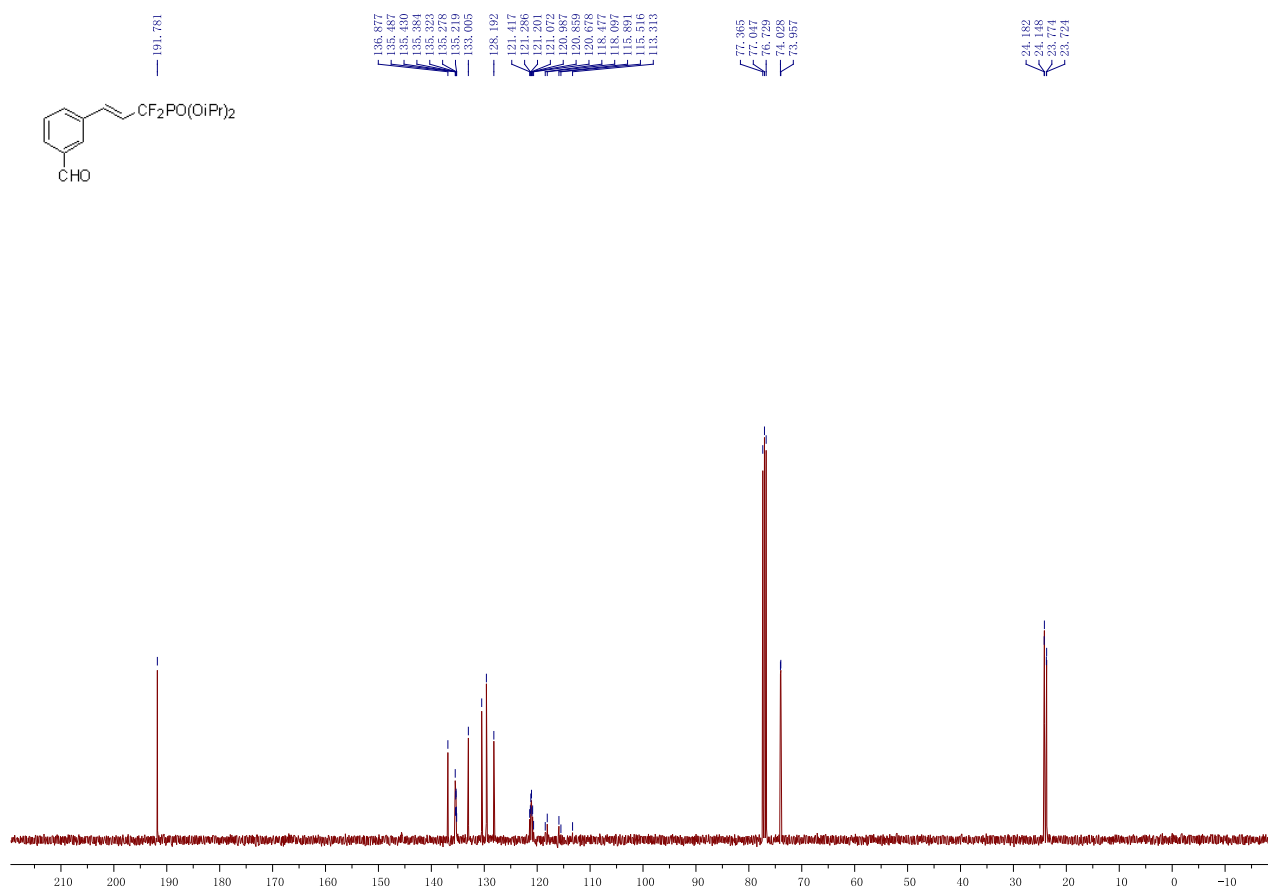

### Diisopropyl (1,1-difluoro-3-phenylbut-3-en-1-yl)phosphonate (3j).

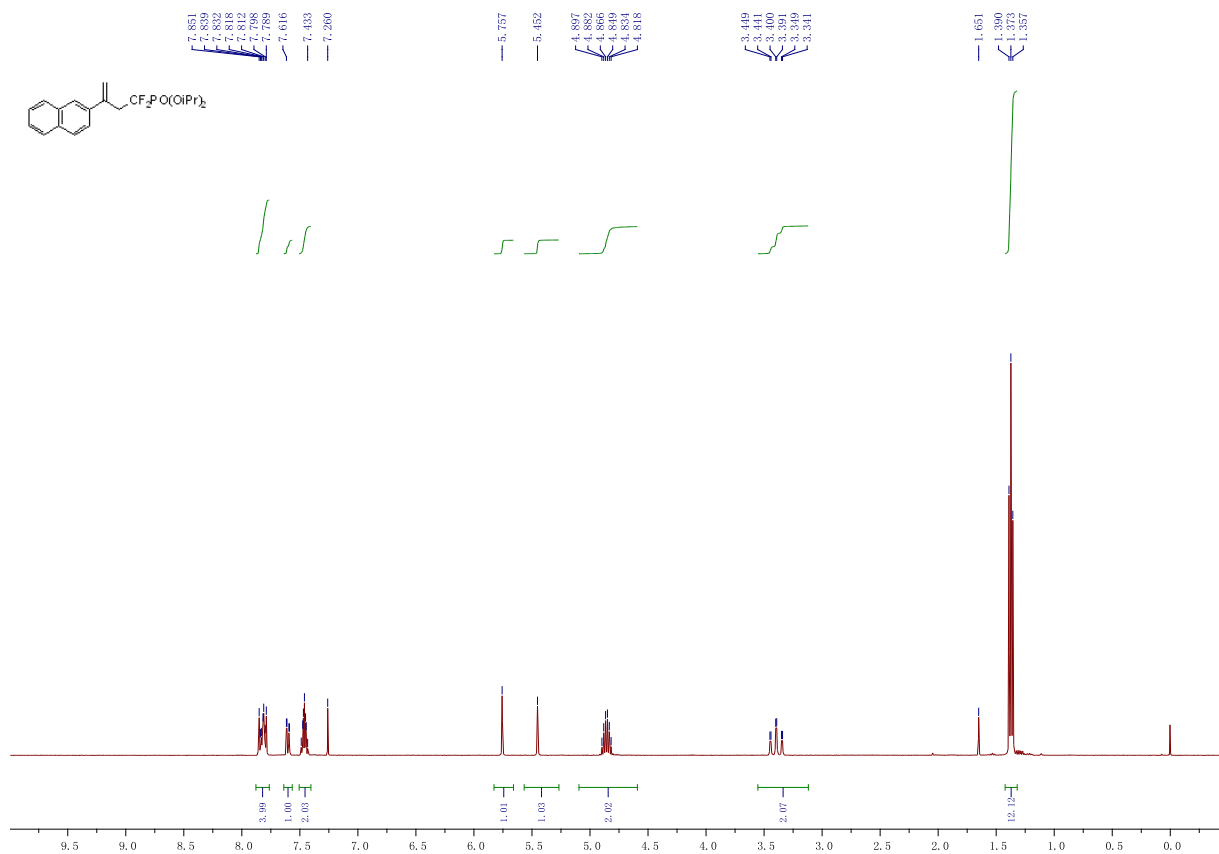

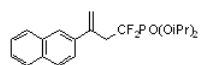

-111.727  
 -111.780  
 -111.833  
 -112.012  
 -112.065  
 -112.118

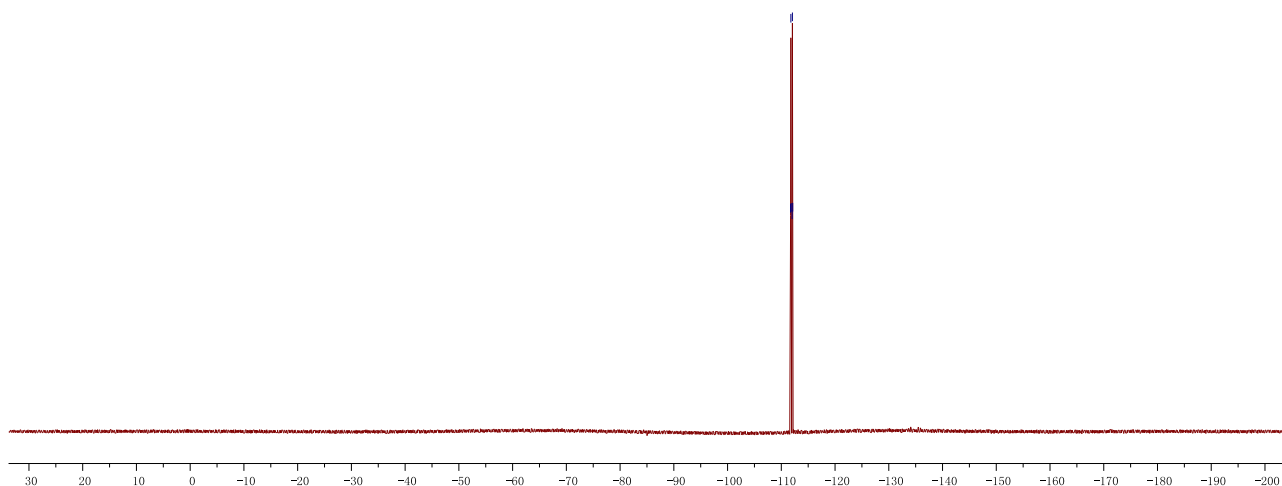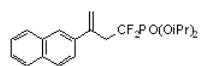

138.271  
 138.252  
 138.223  
 138.122  
 137.775  
 137.828  
 137.828  
 128.264  
 127.506  
 126.178  
 125.973  
 125.192  
 124.437  
 122.949  
 120.792  
 120.349  
 118.676  
 118.193  
 117.748  
 115.589

77.335  
 77.000  
 76.665  
 73.732  
 73.661

39.046  
 38.890  
 38.846  
 38.686  
 38.635  
 38.481

24.154  
 23.119  
 23.792  
 23.743

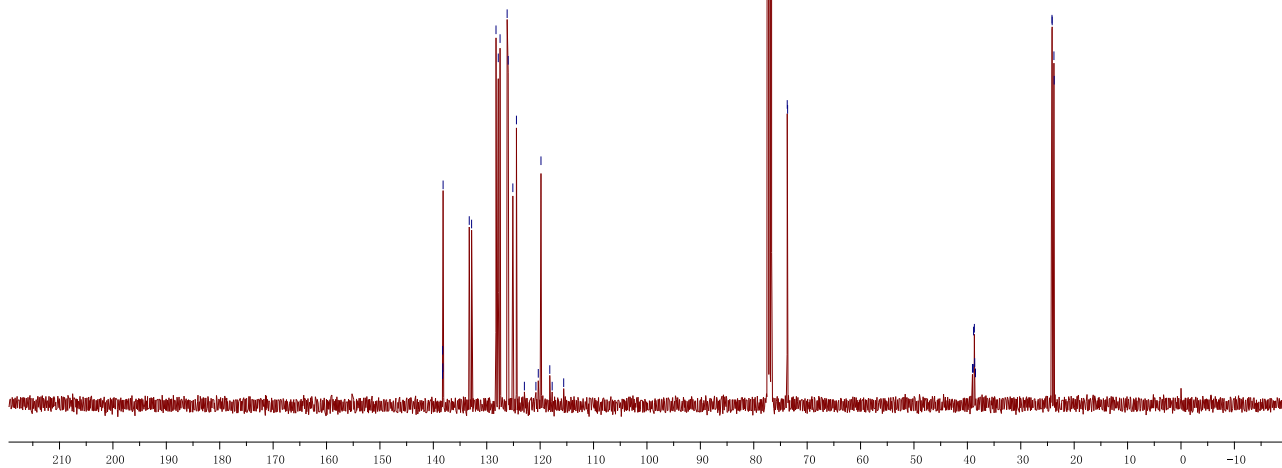

# Diisopropyl (difluoro(1H-inden-2-yl)methyl)phosphonate (3k).

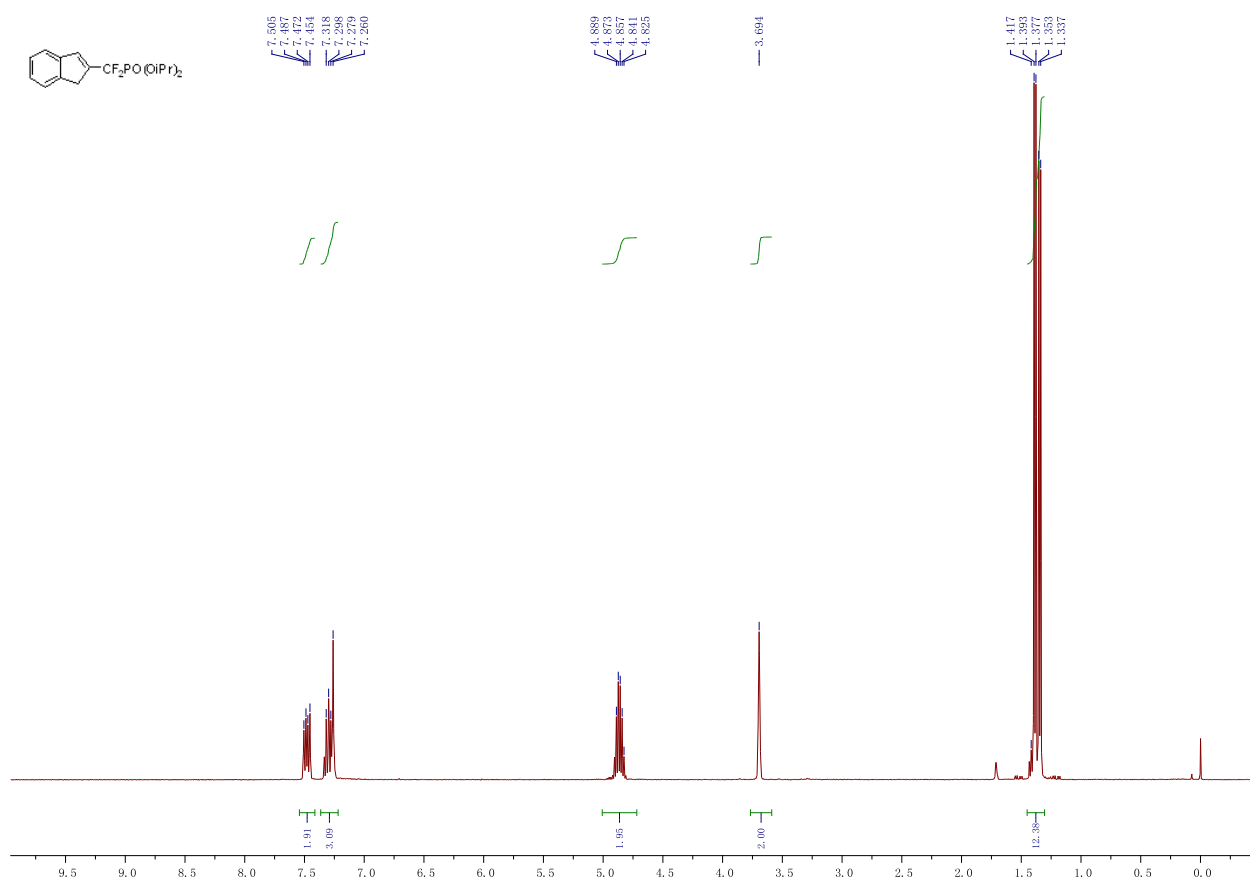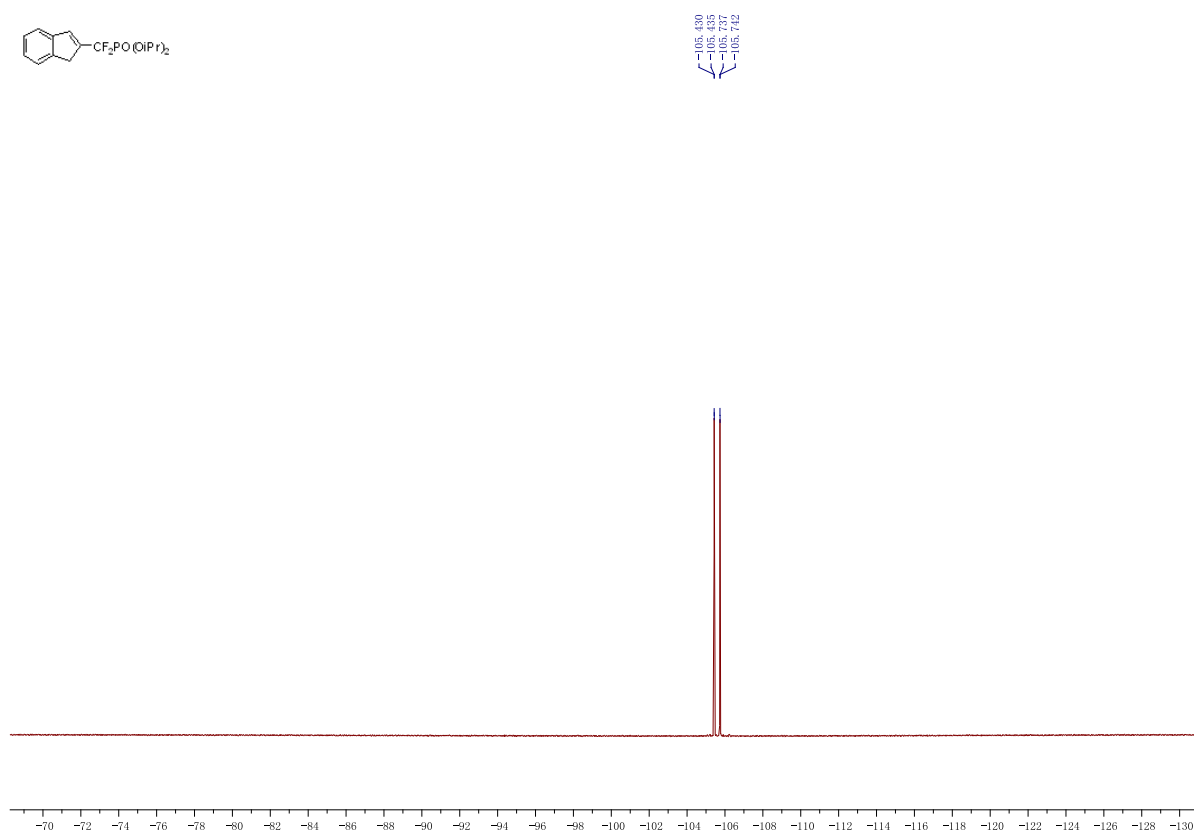

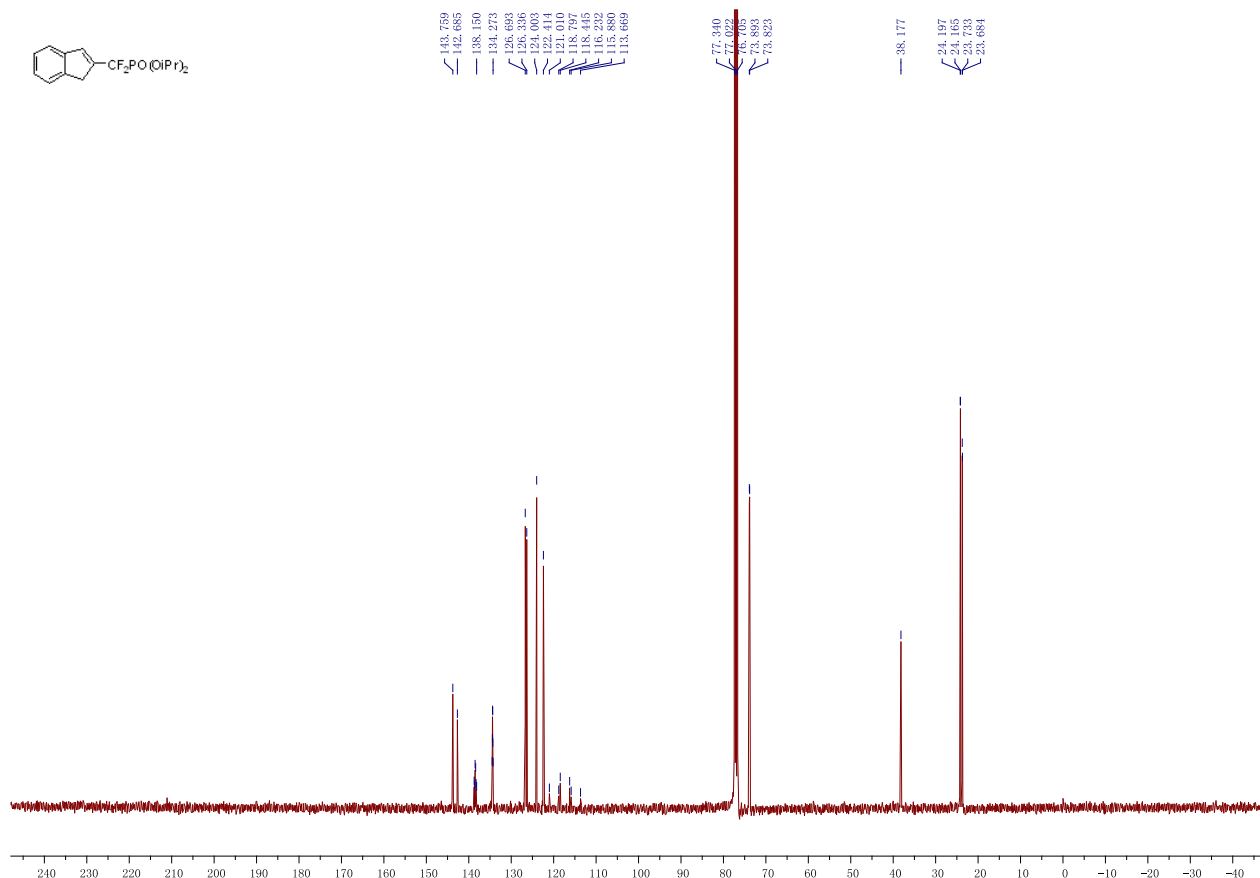

**(*E*)-Diisopropyl (3-(3,4-dihydronaphthalen-2-yl)-1,1-difluoroallyl)phosphonate (31).**

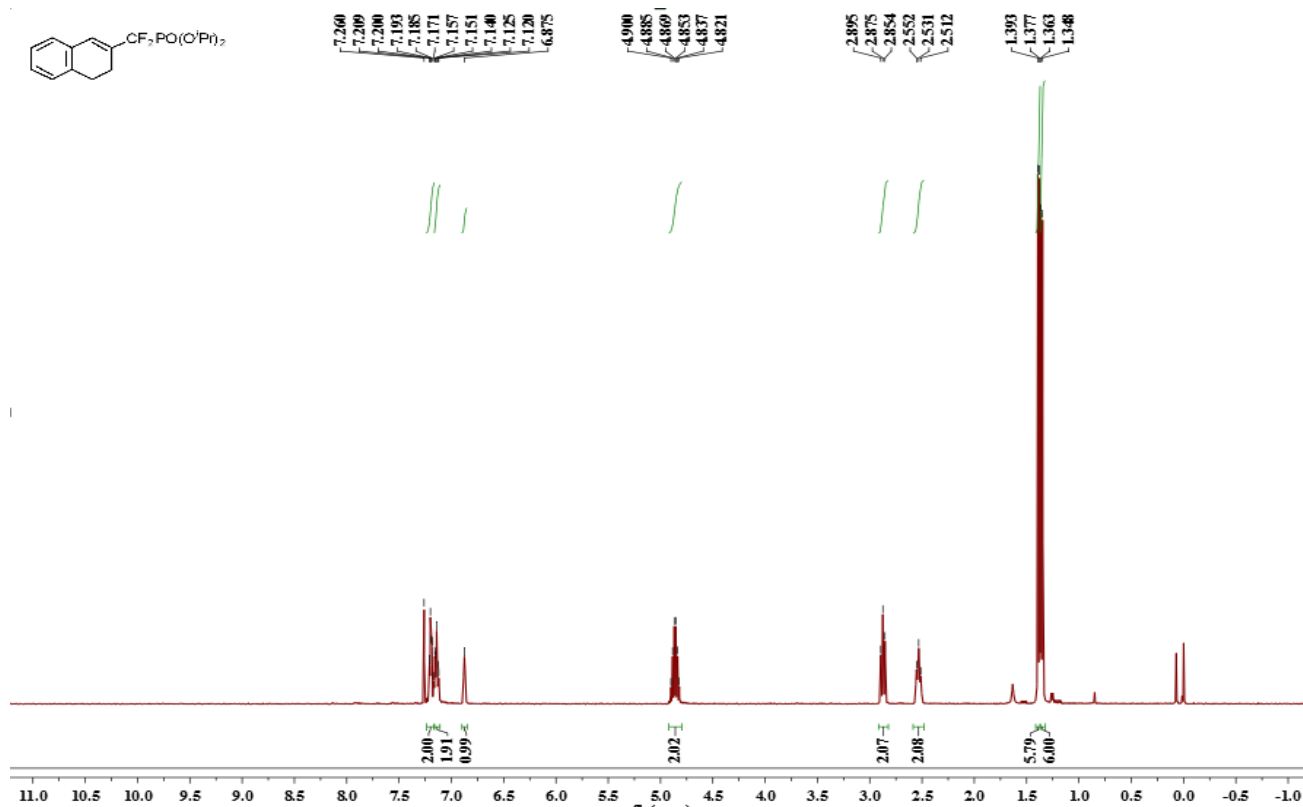



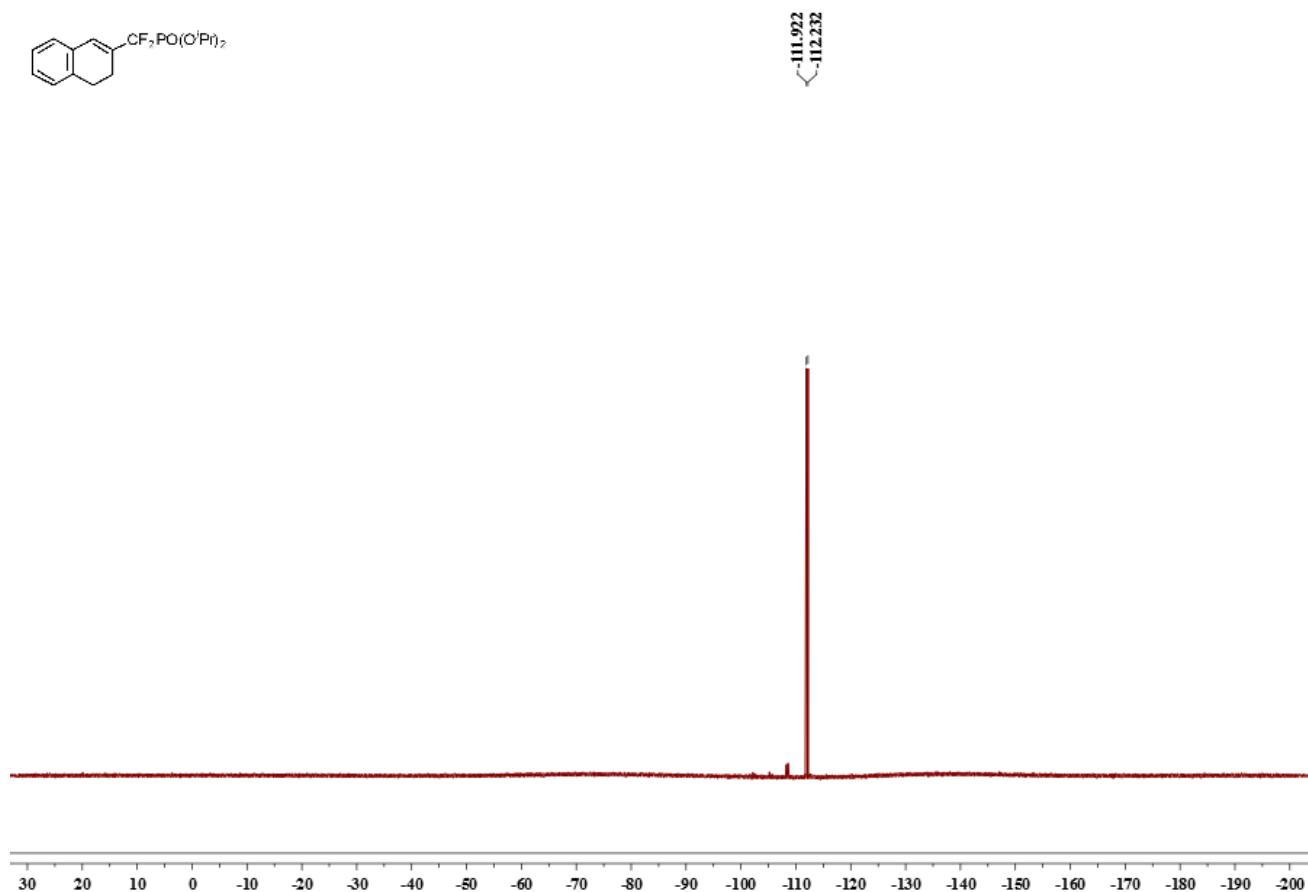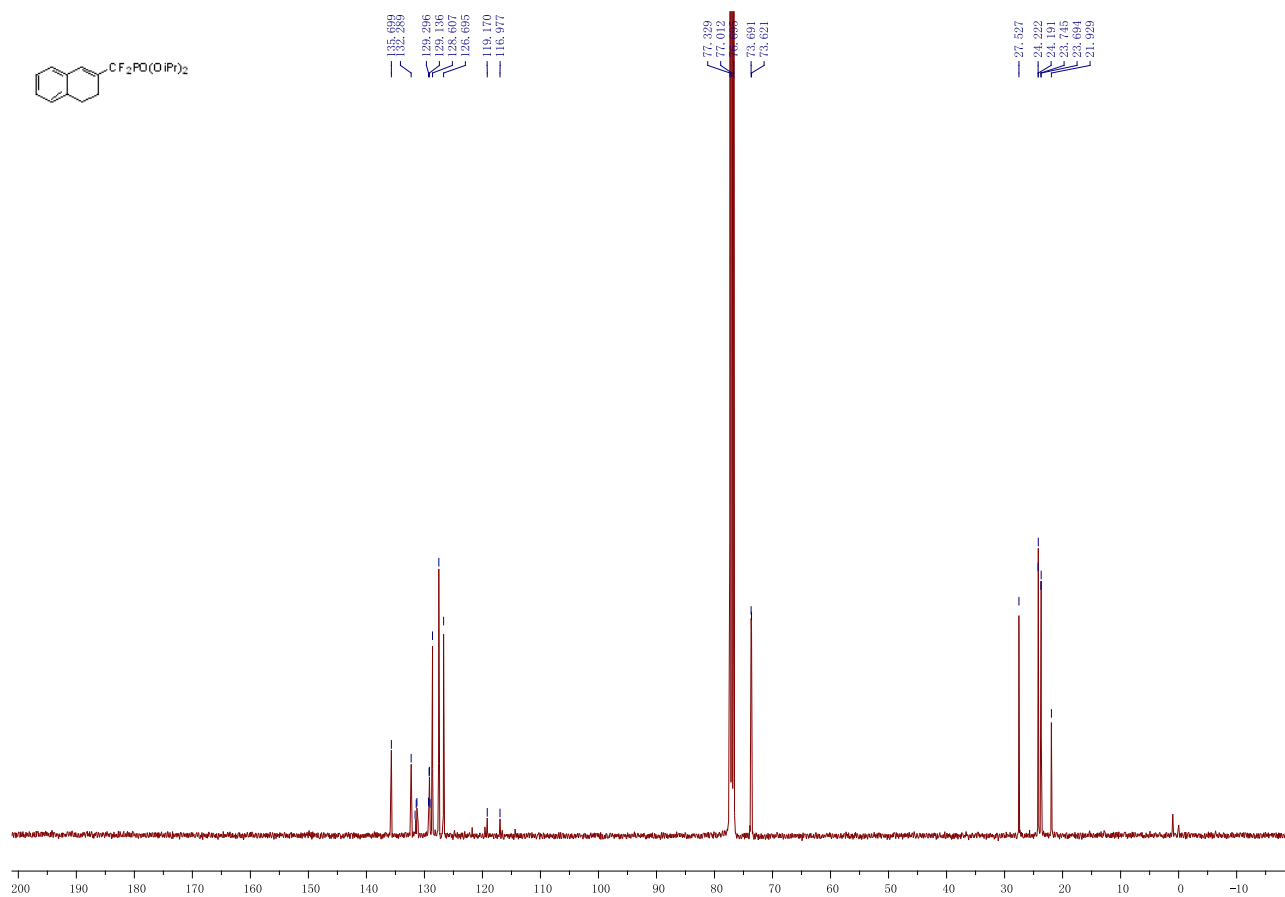

**Diisopropyl ((2*E*,4*E*)-1,1-difluoro-5-phenylpenta-2,4-dien-1-yl)phosphonate (3m).**

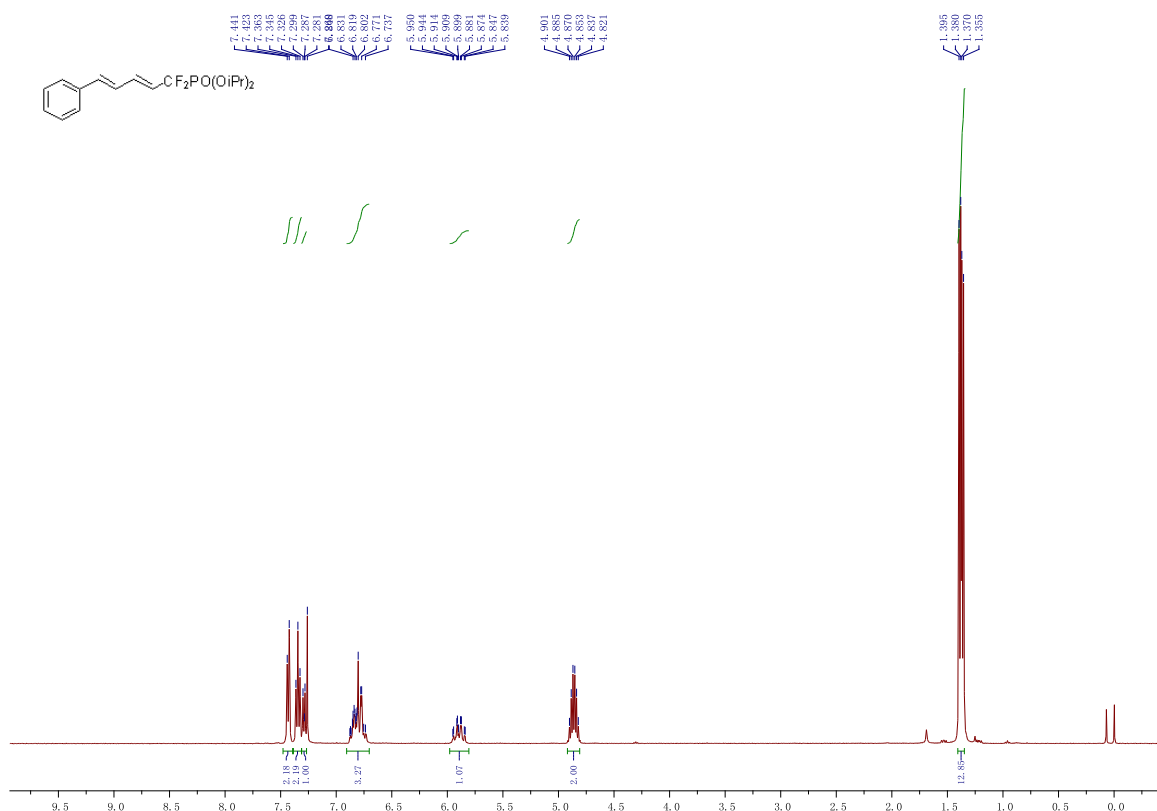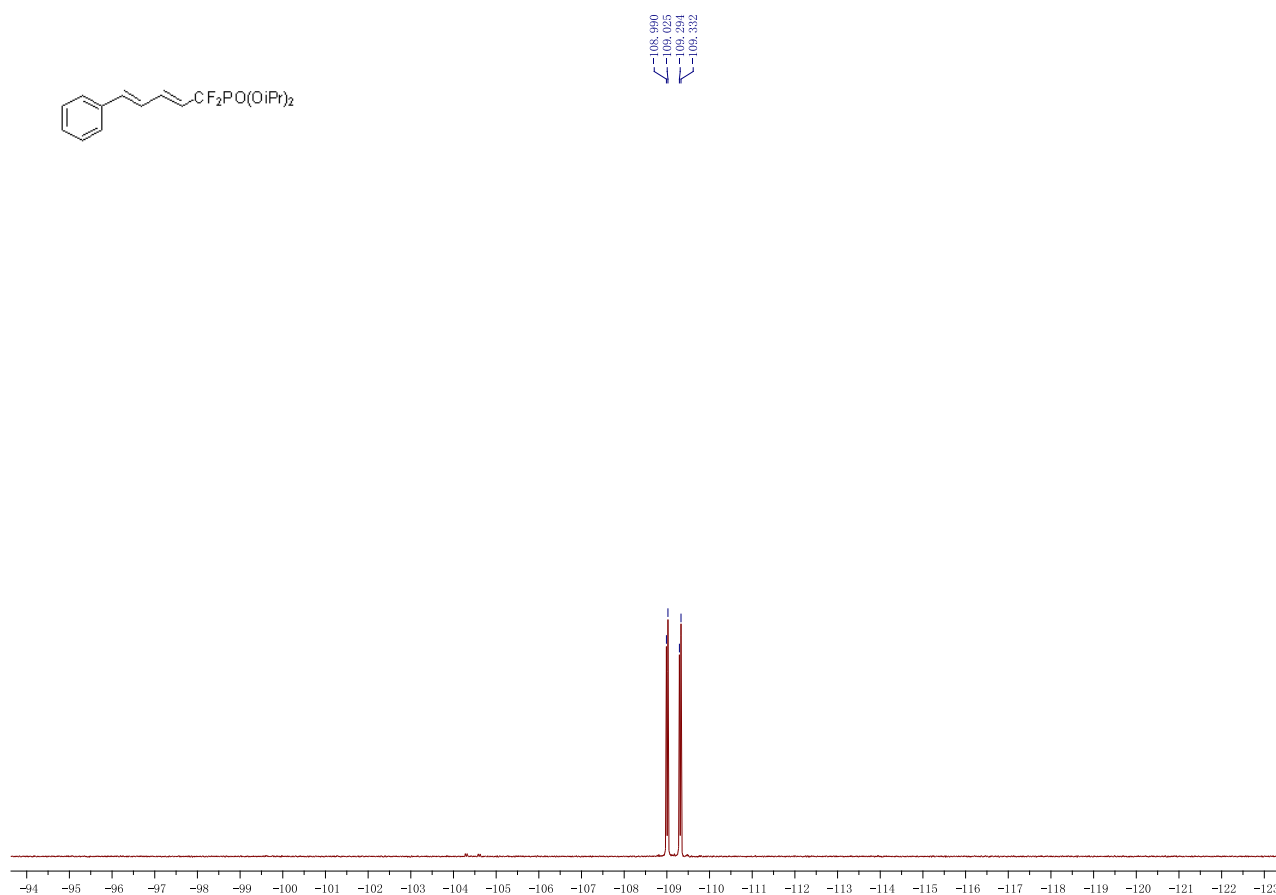

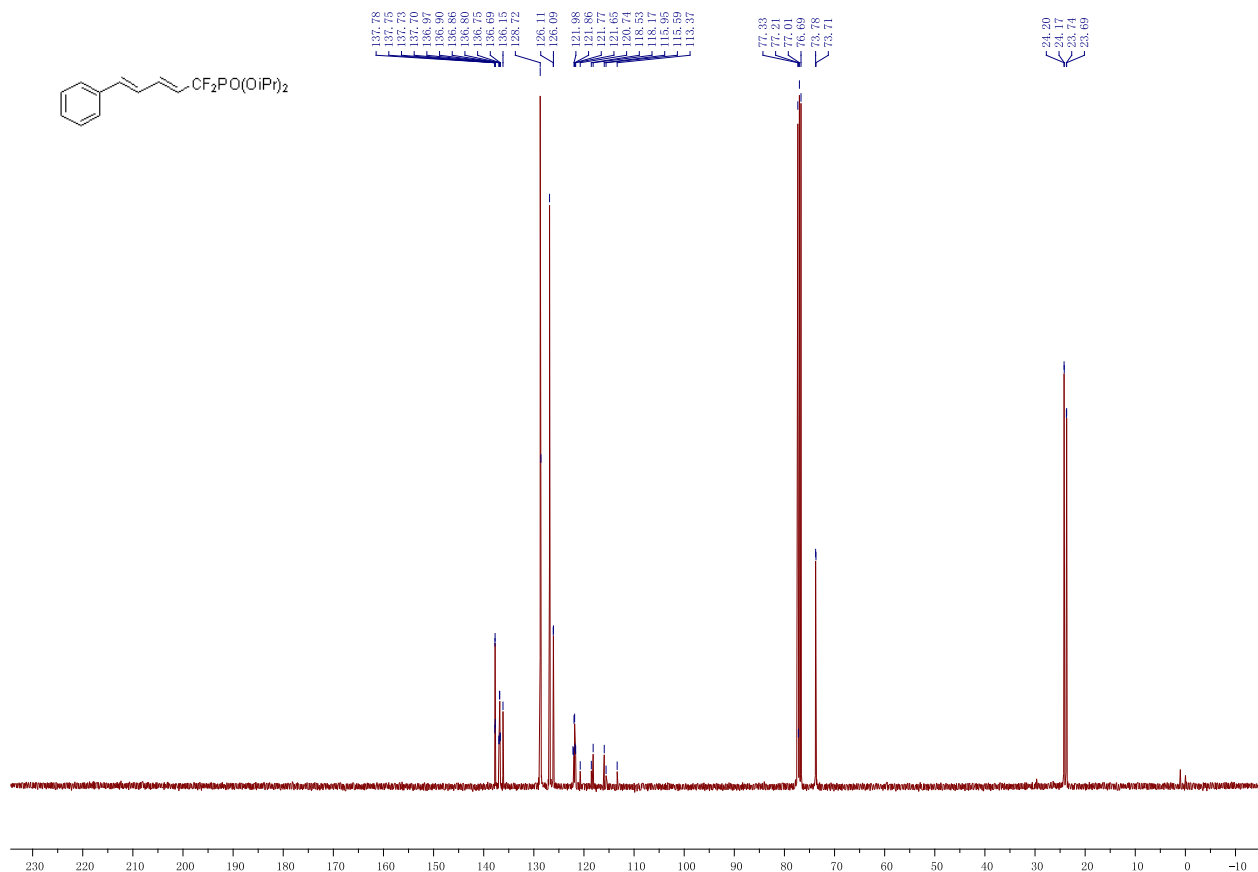

**(E)-Diisopropyl (1,1-difluoro-3-(4-methylthiazol-5-yl)allyl)phosphonate (3n).**

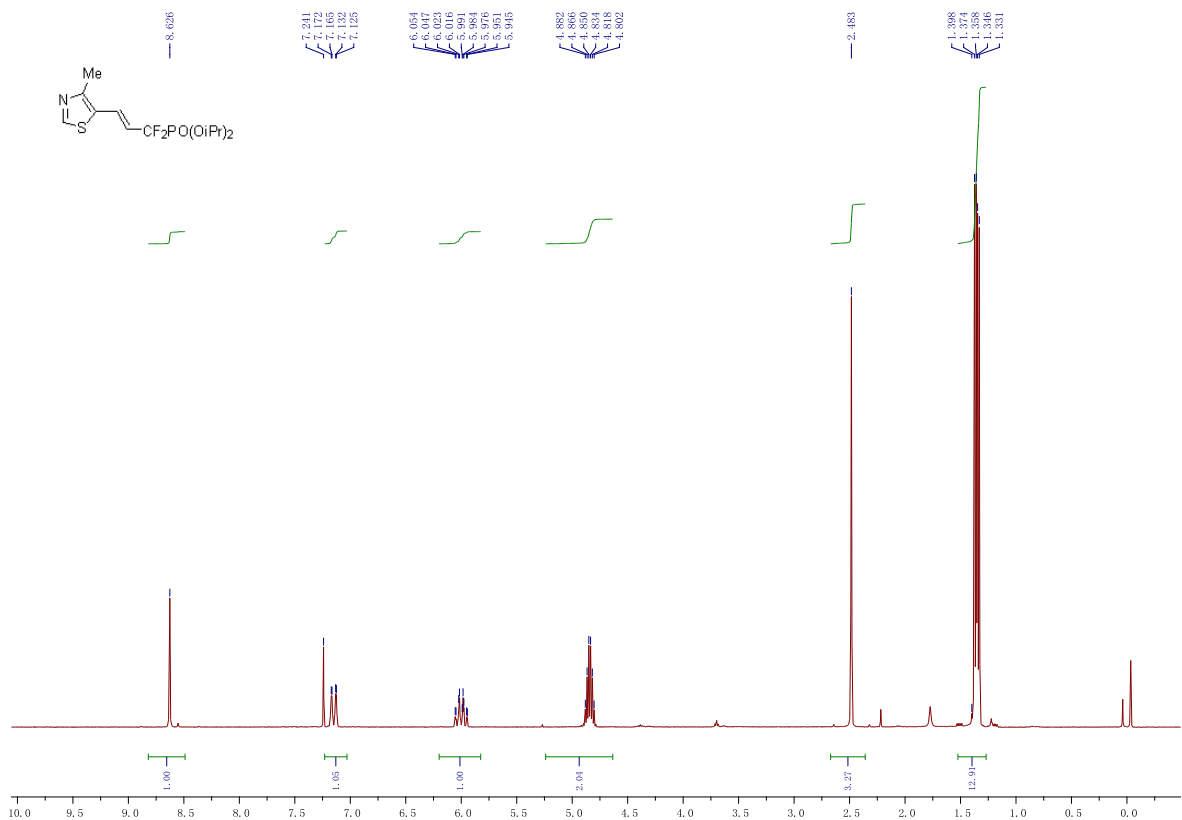

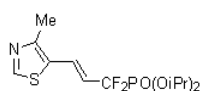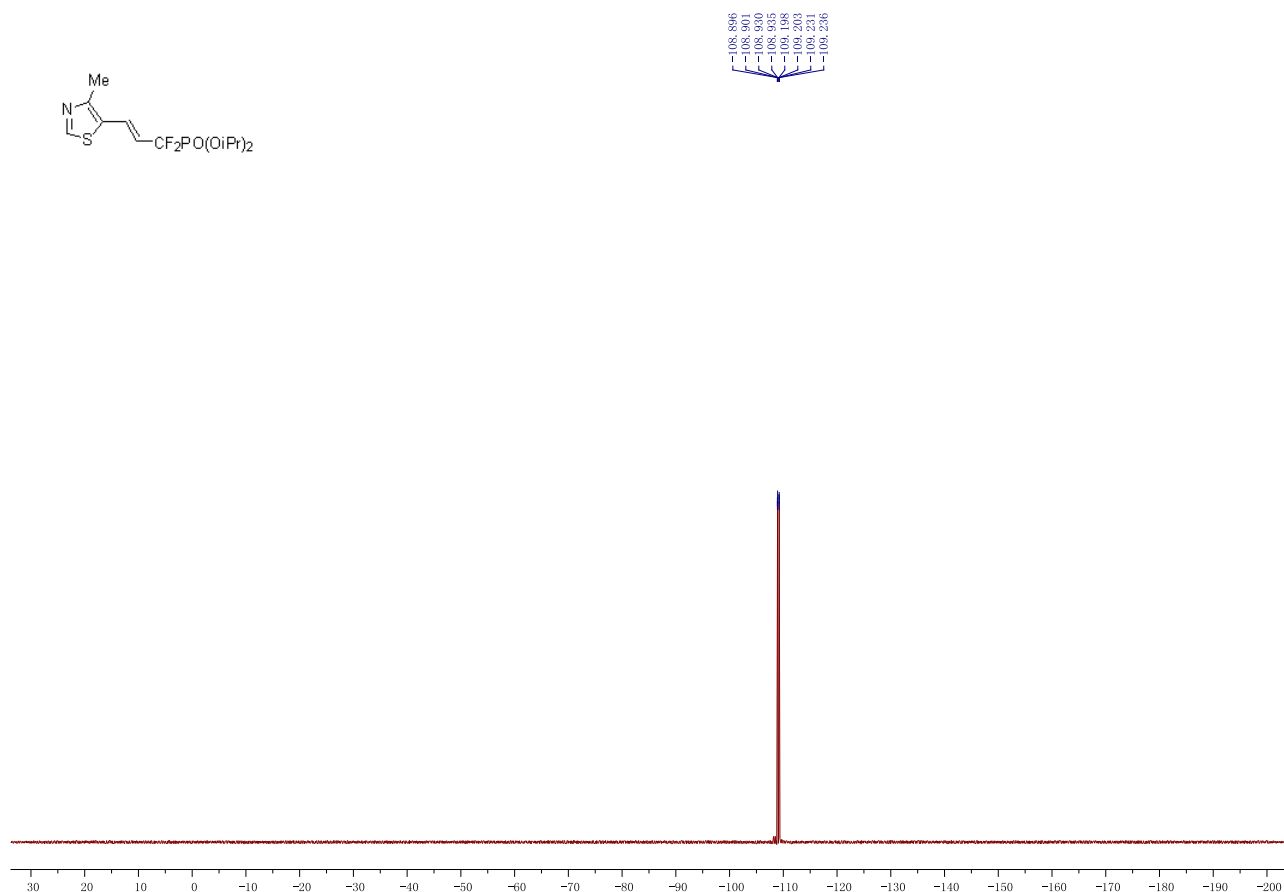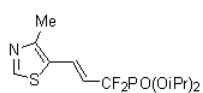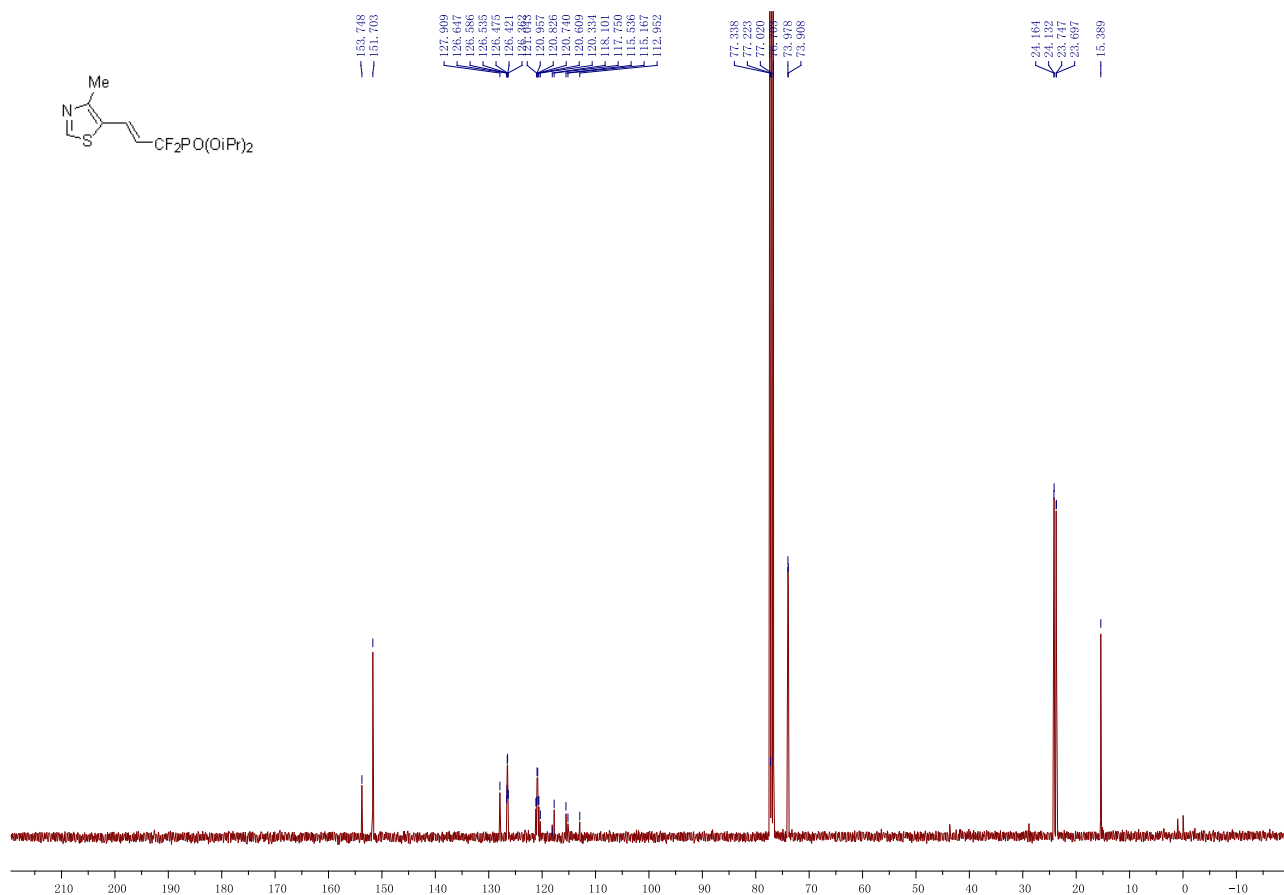

**(*E*)-Diisopropyl (1,1-difluoro-3-(2-oxopyrrolidin-1-yl)allyl)phosphonate (3o).**

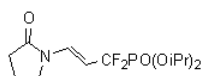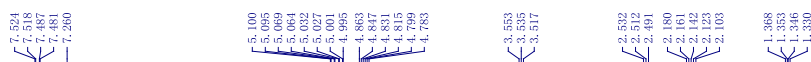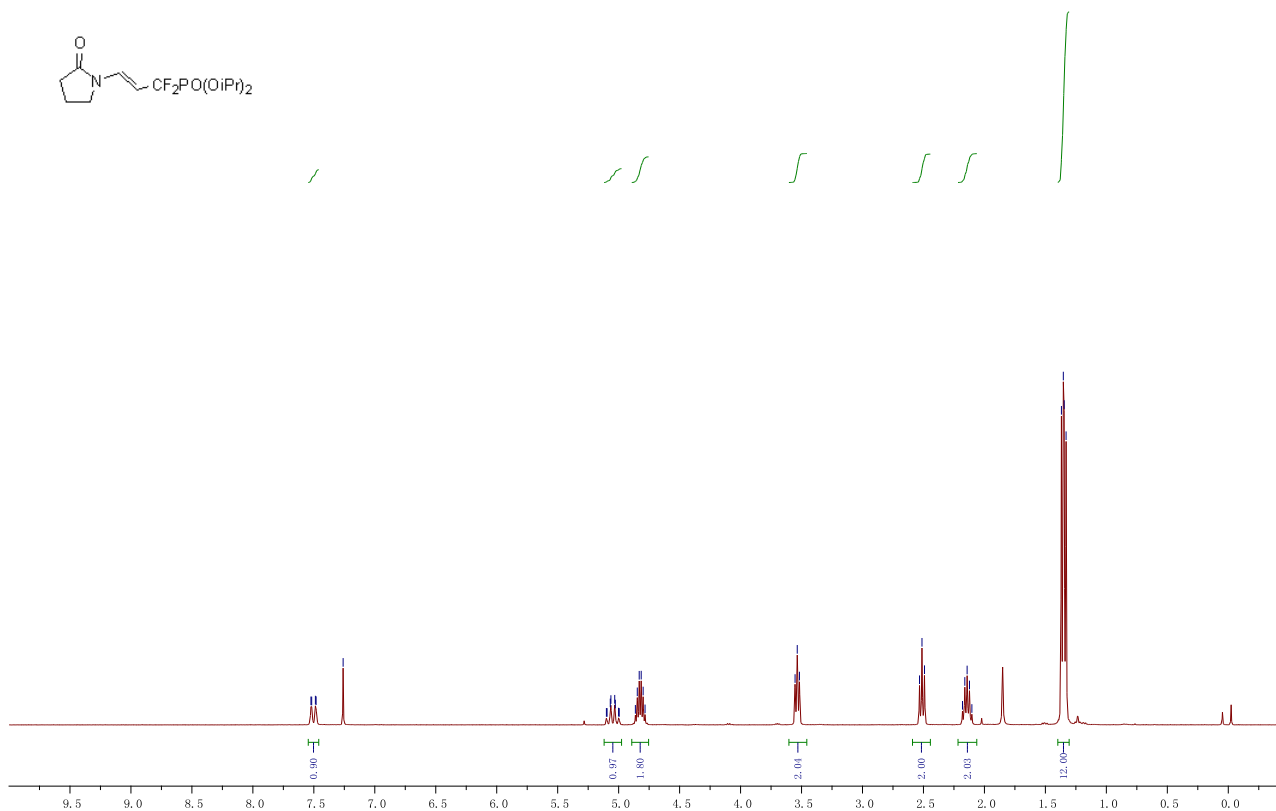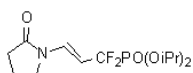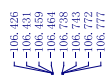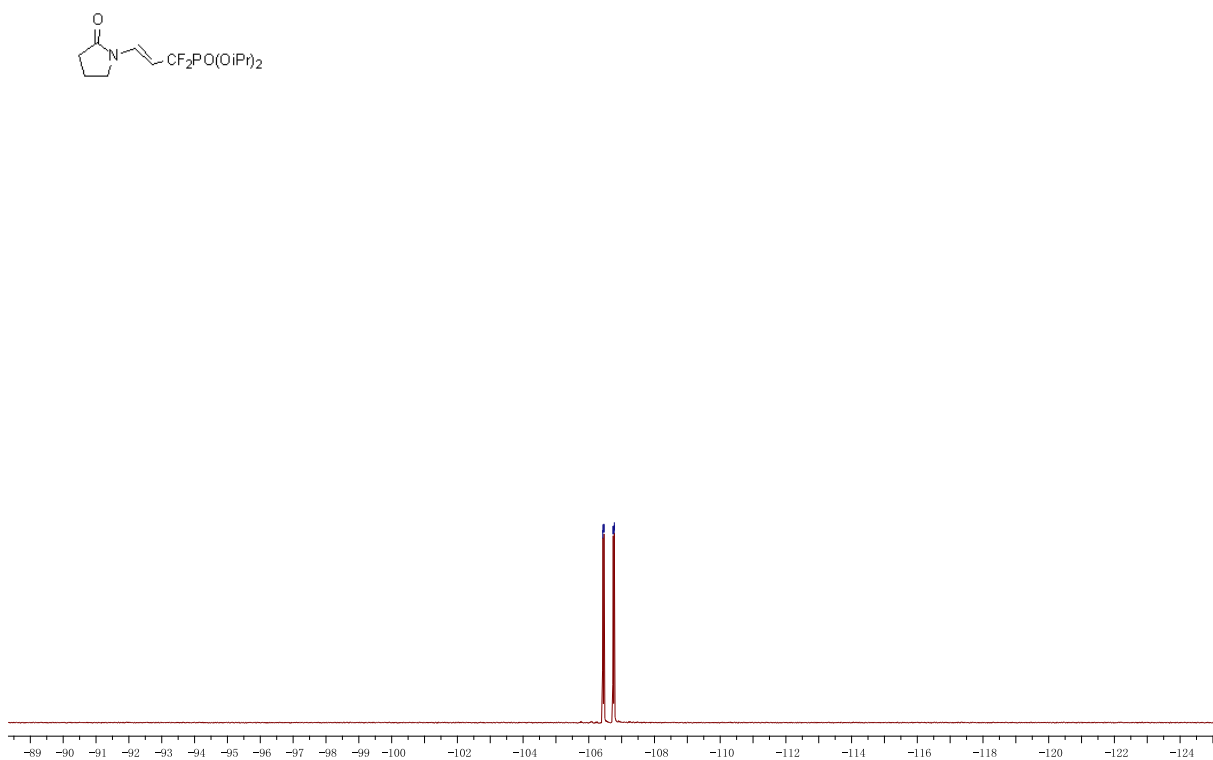

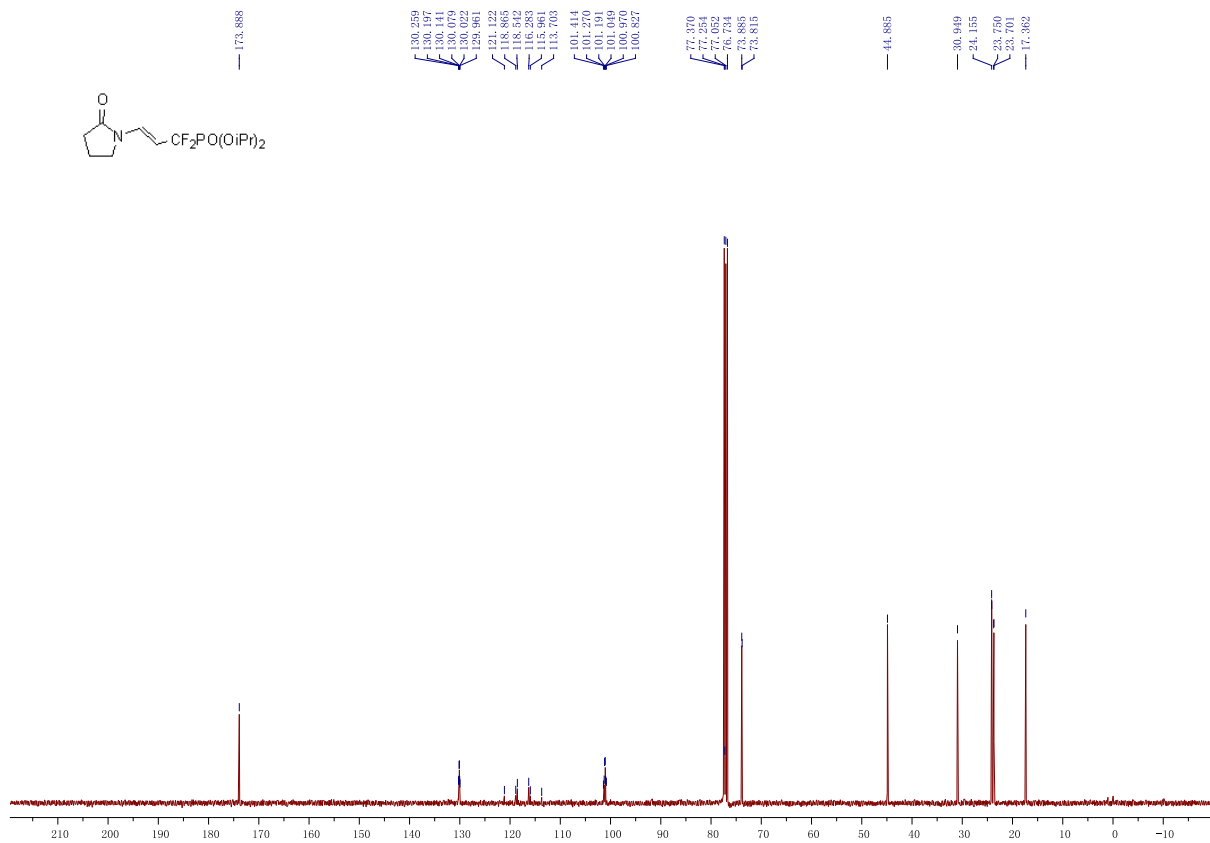

### Diisopropyl (difluoro(2-oxo-2H-chromen-3-yl)methyl)phosphonate (3p).

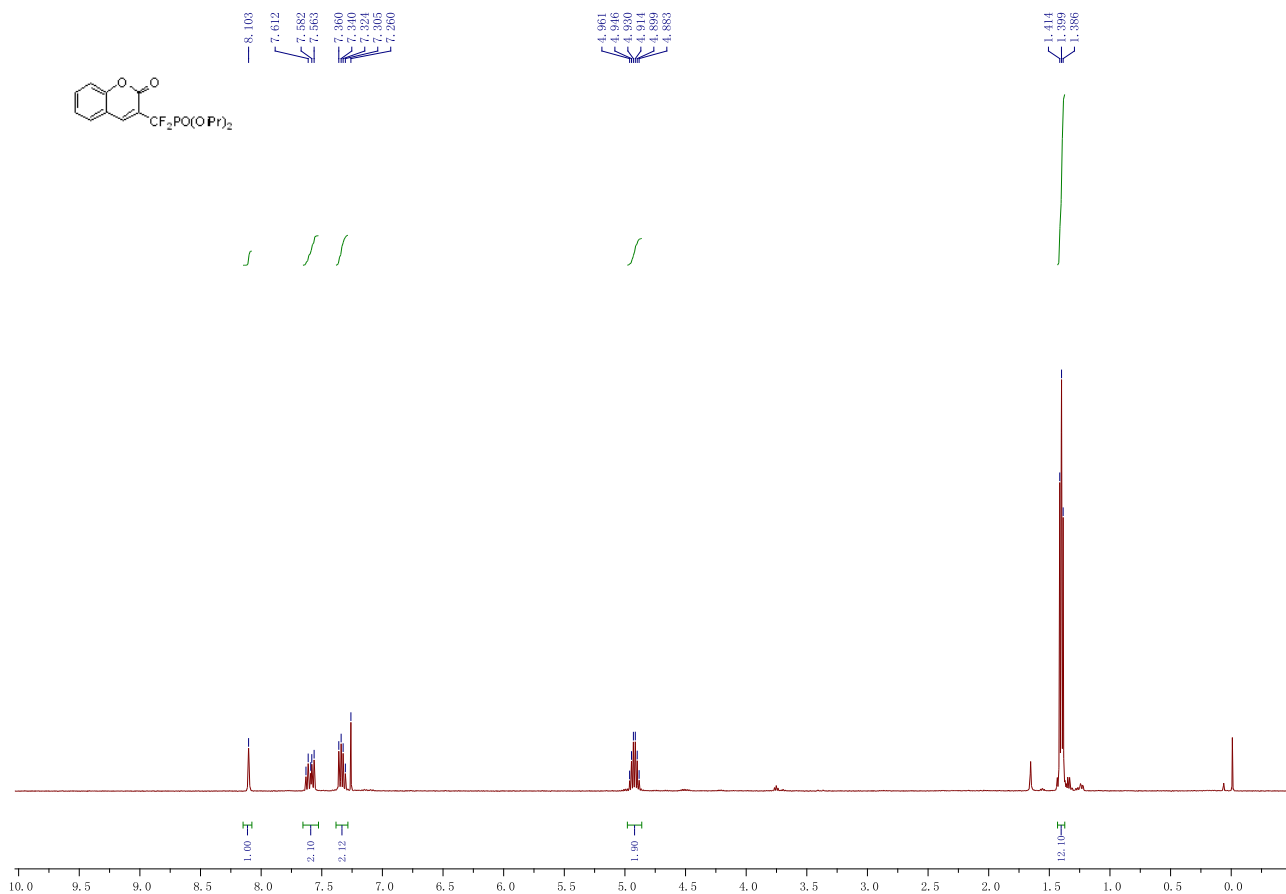

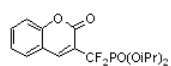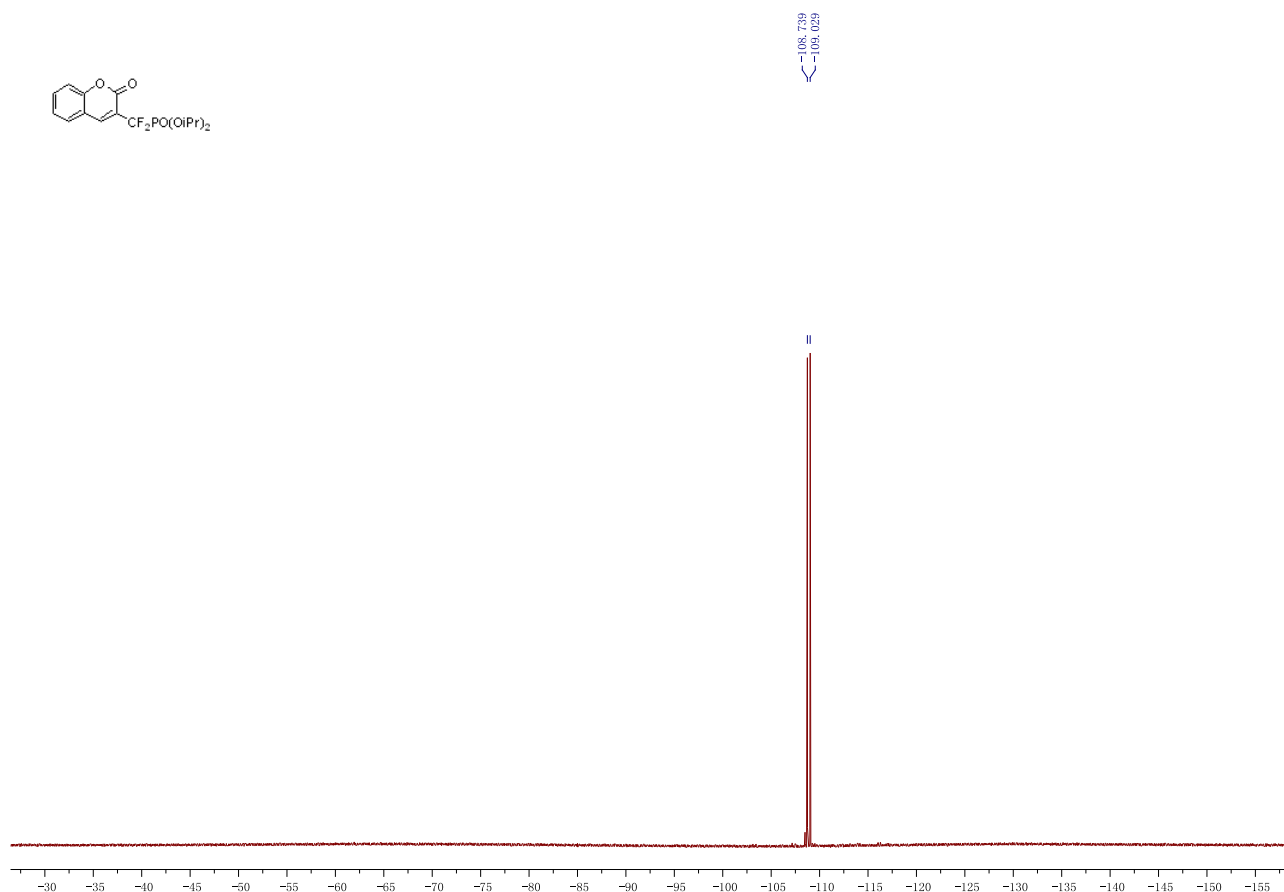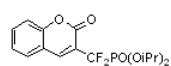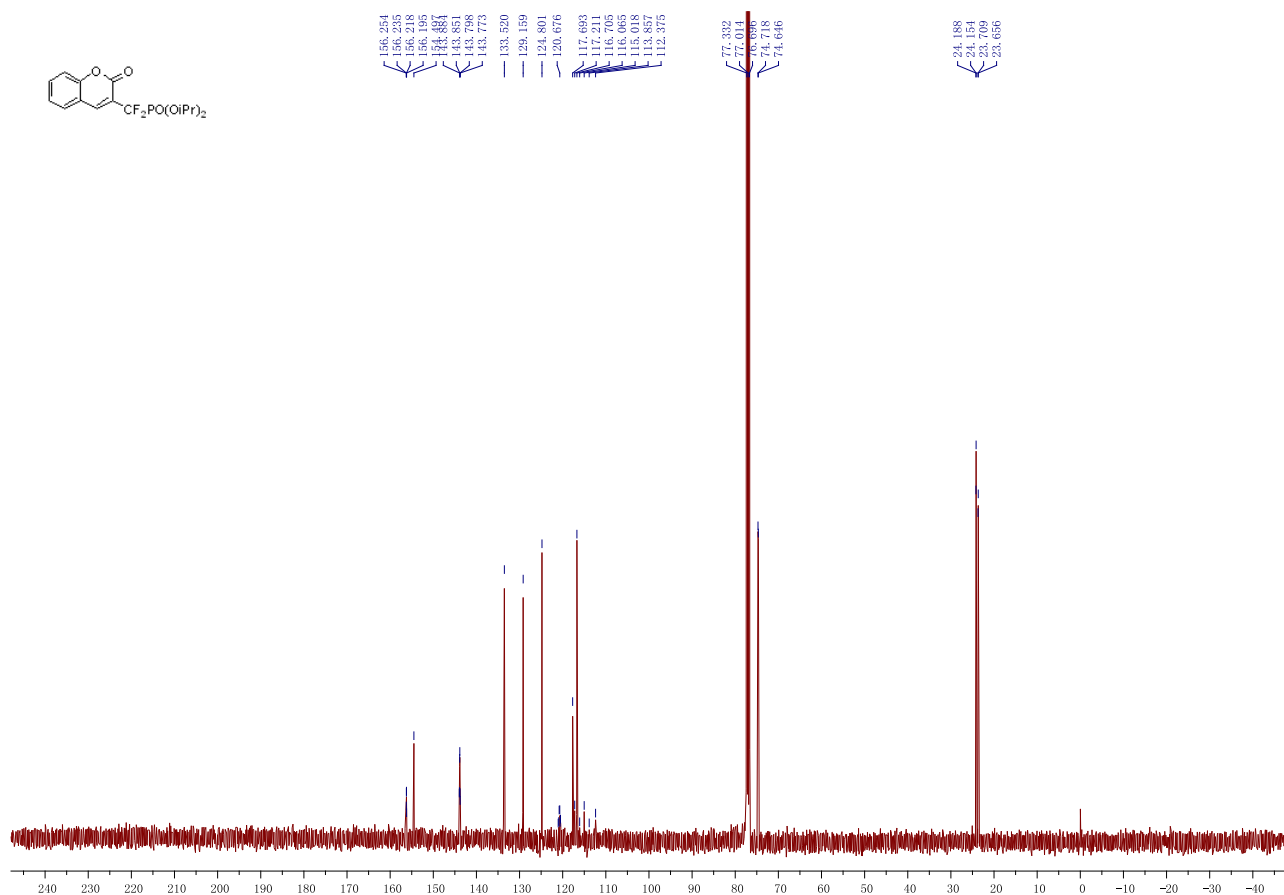

**Diisopropyl(difluoro(1-methyl-2-oxo-1,2-dihydroquinolin-3-yl)methyl)phosphonate (3q).**

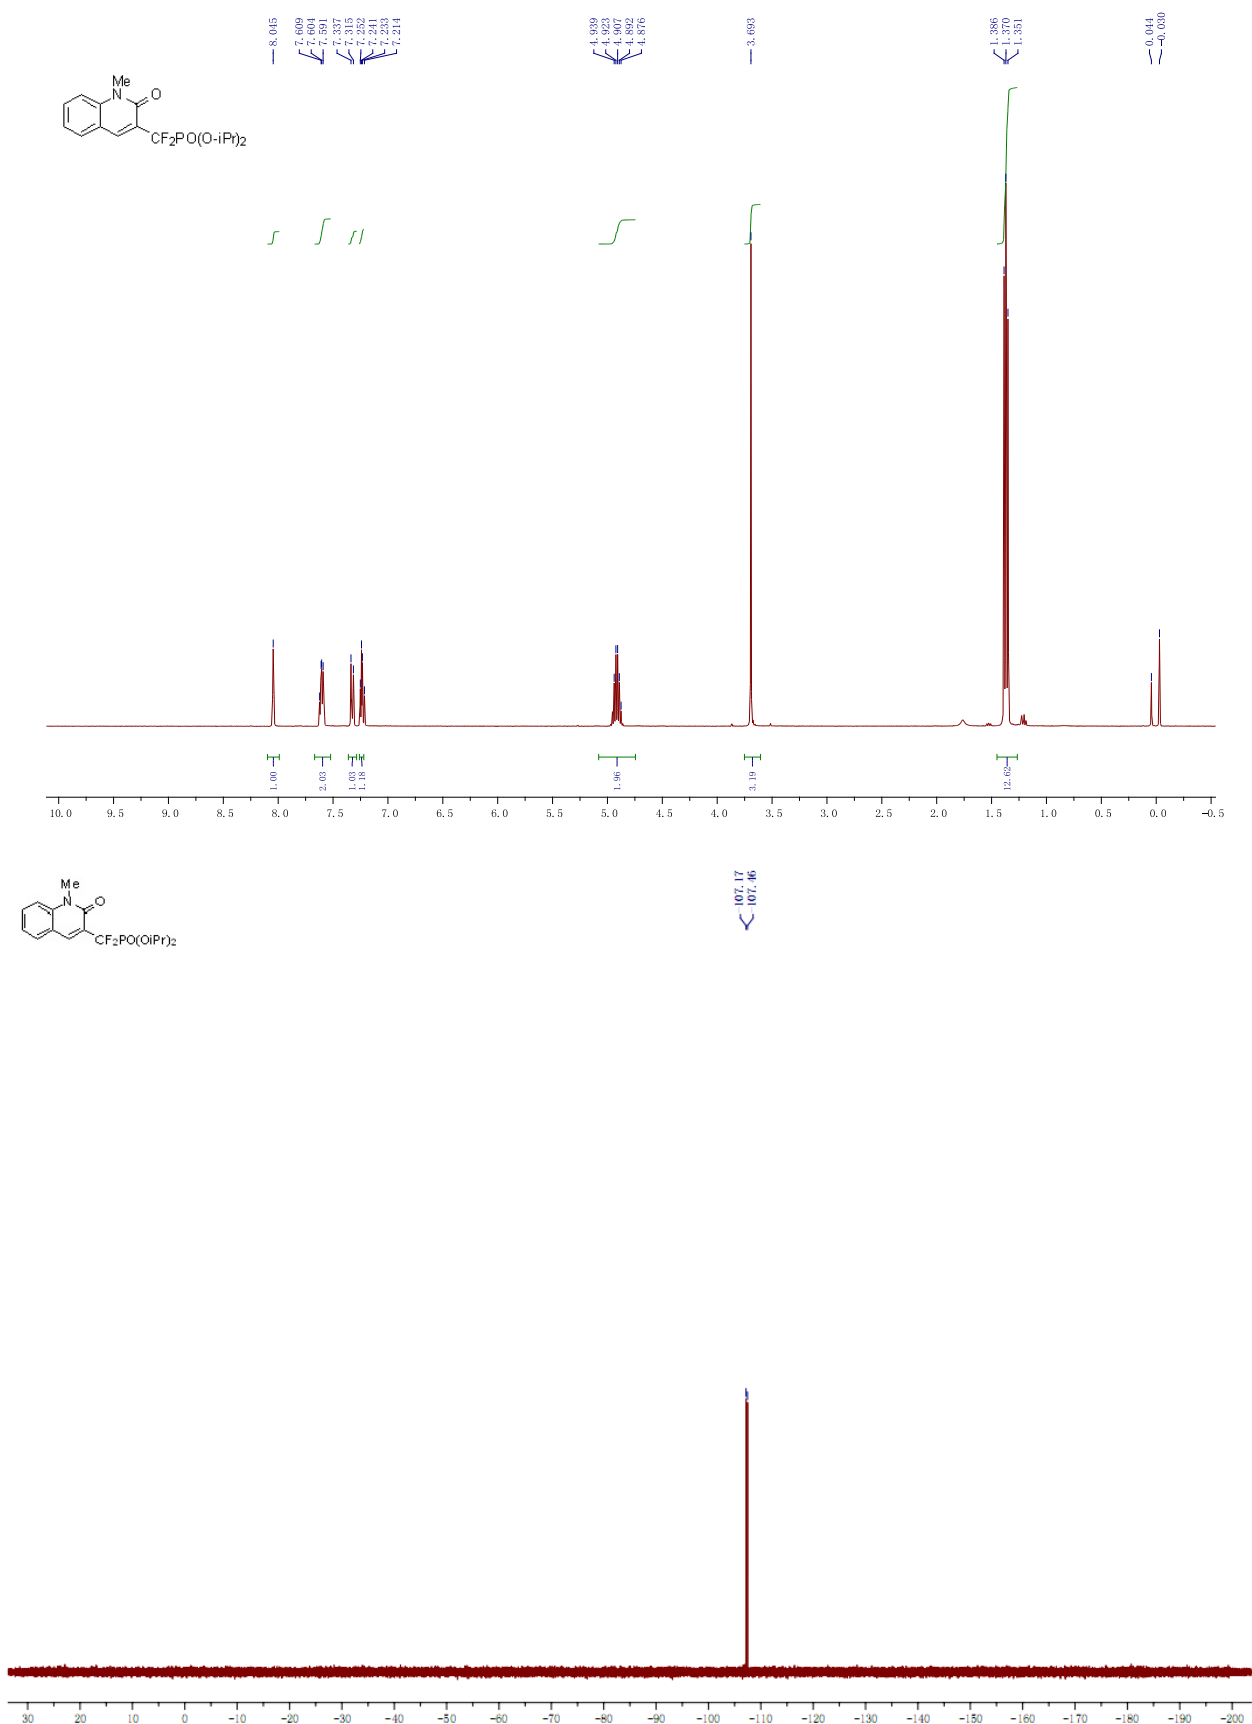



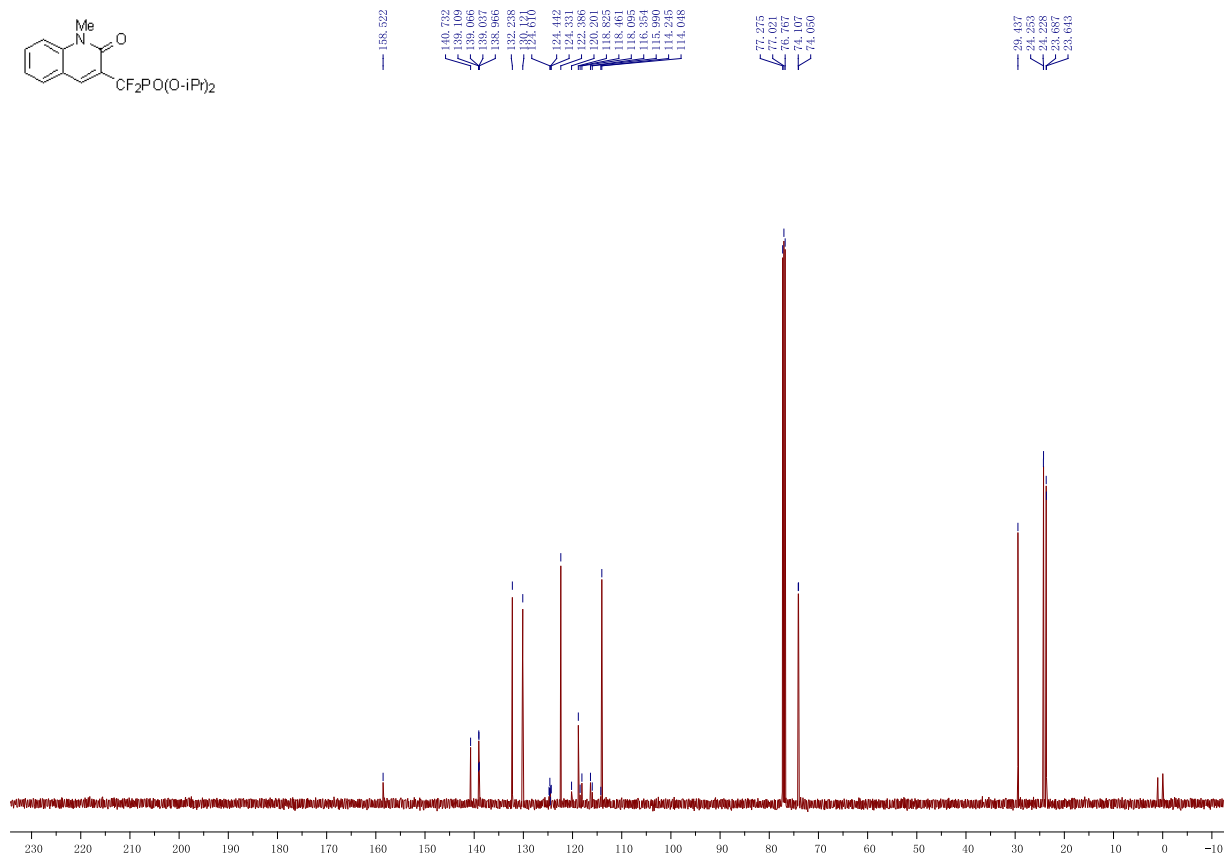

**Diisopropyl((*E*)-1,1-difluoro-3-((8*R*,9*S*,13*S*,14*S*)-13-methyl-17-oxo-7,8,9,11,12,13,14,15,16,17-decahydro-6*H*-cyclopenta[*a*]phenanthren-3-yl)allyl)phosphonate (5).**

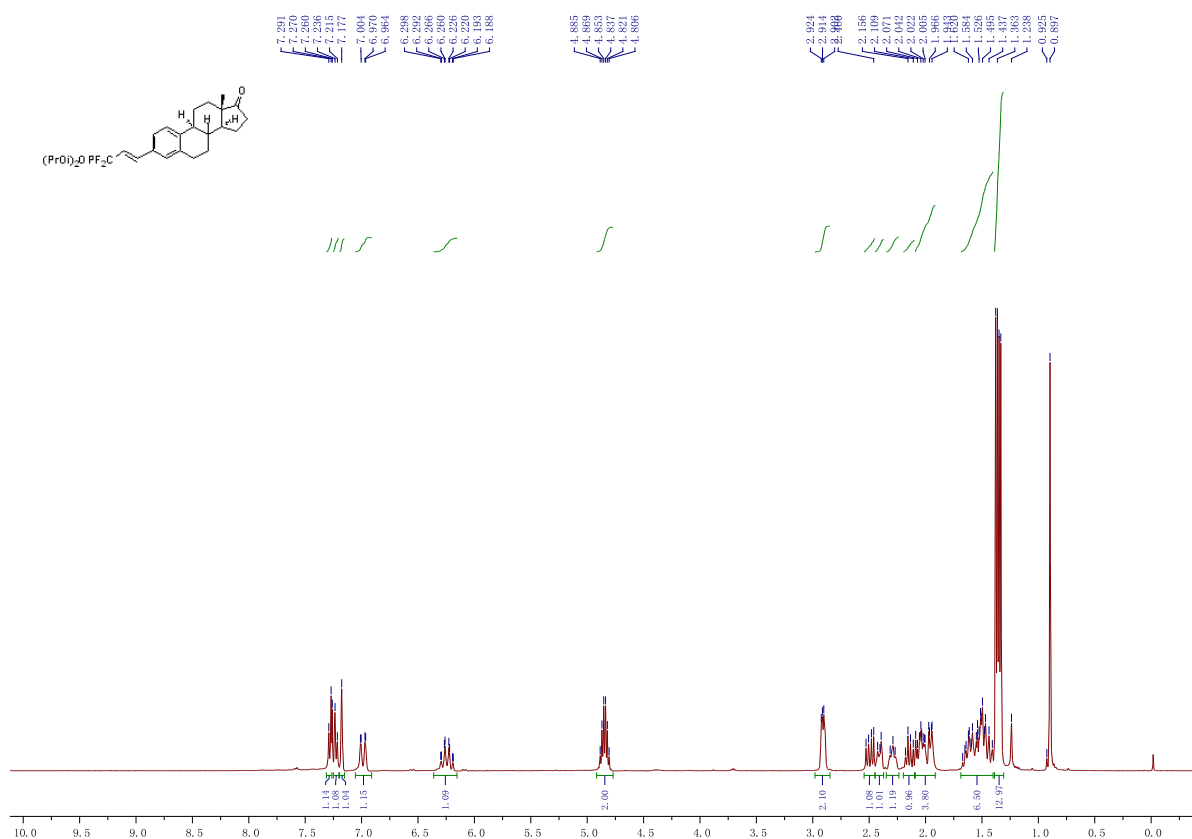

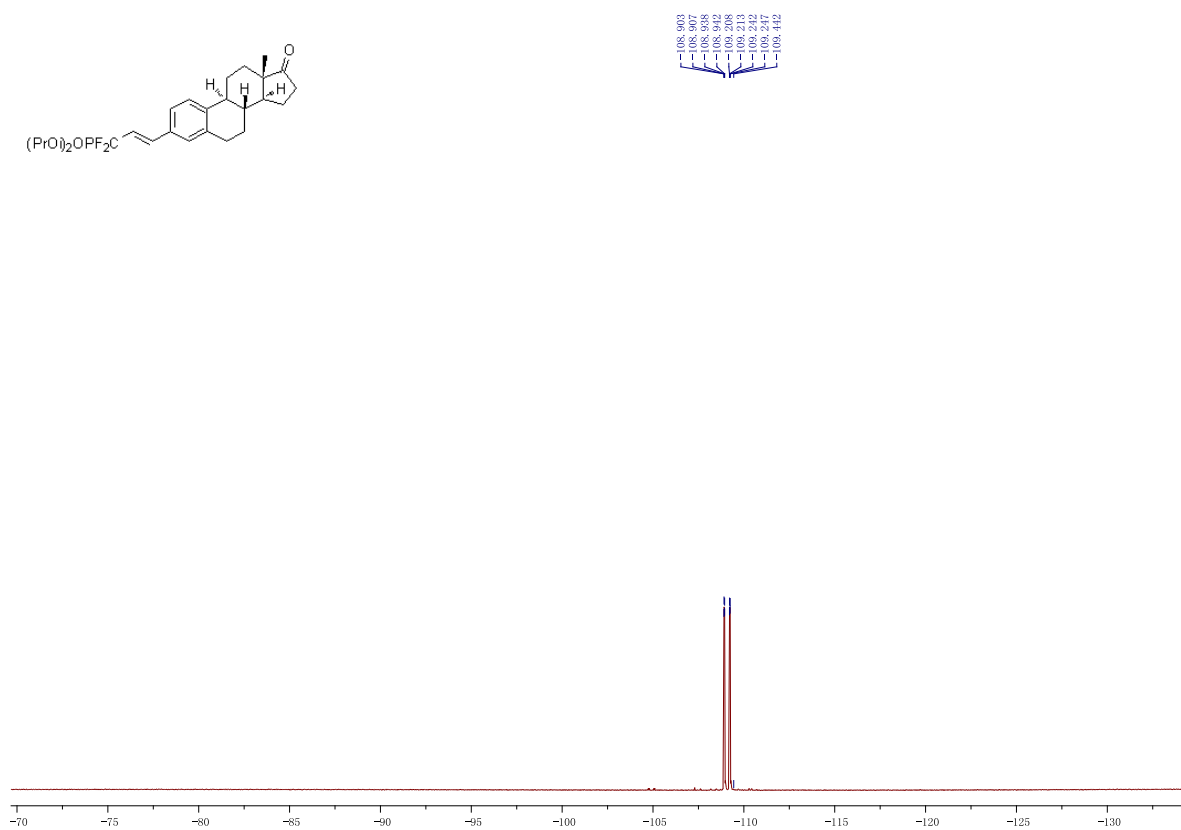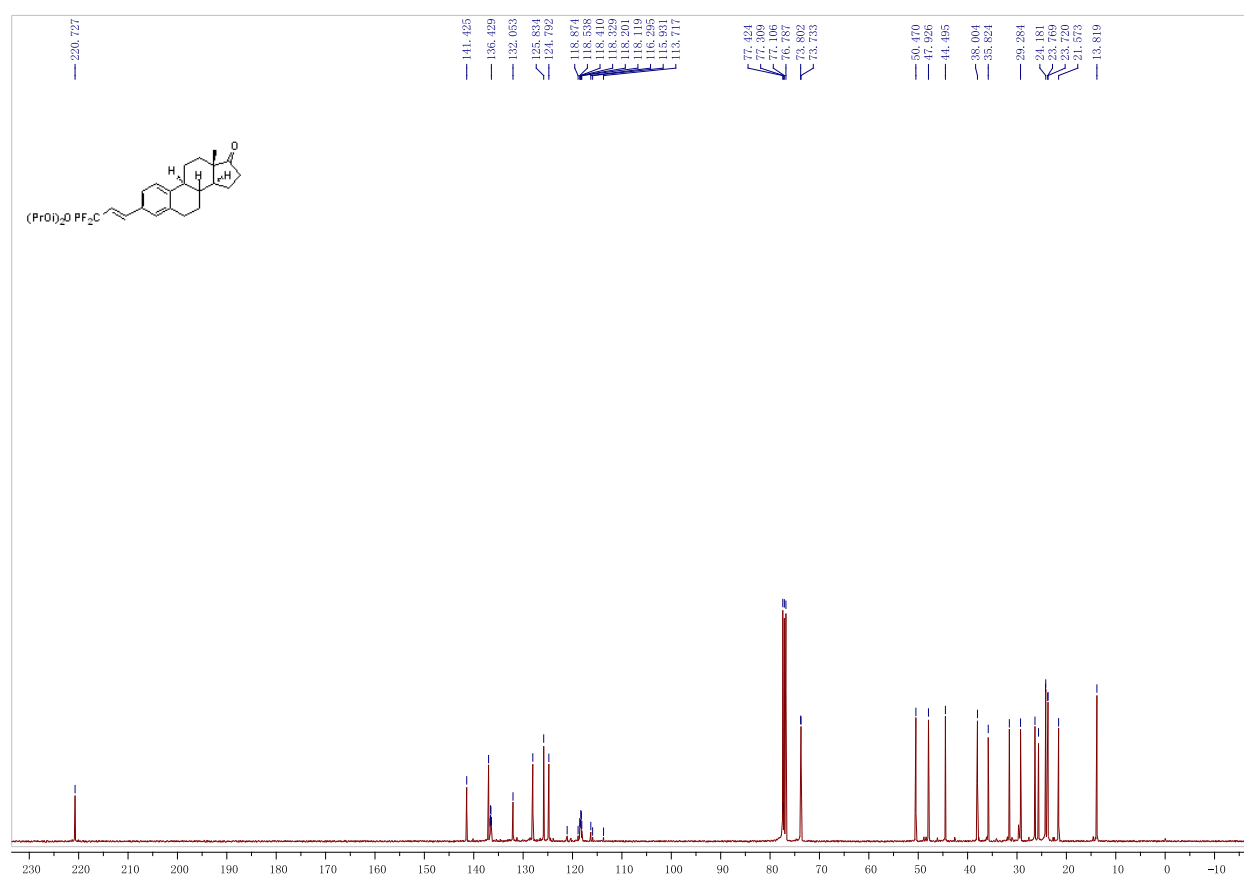

**Diisopropyl (2-(3,4-dihydronaphthalen-1-yl)-1,1-difluoroethyl)phosphonate (7).**

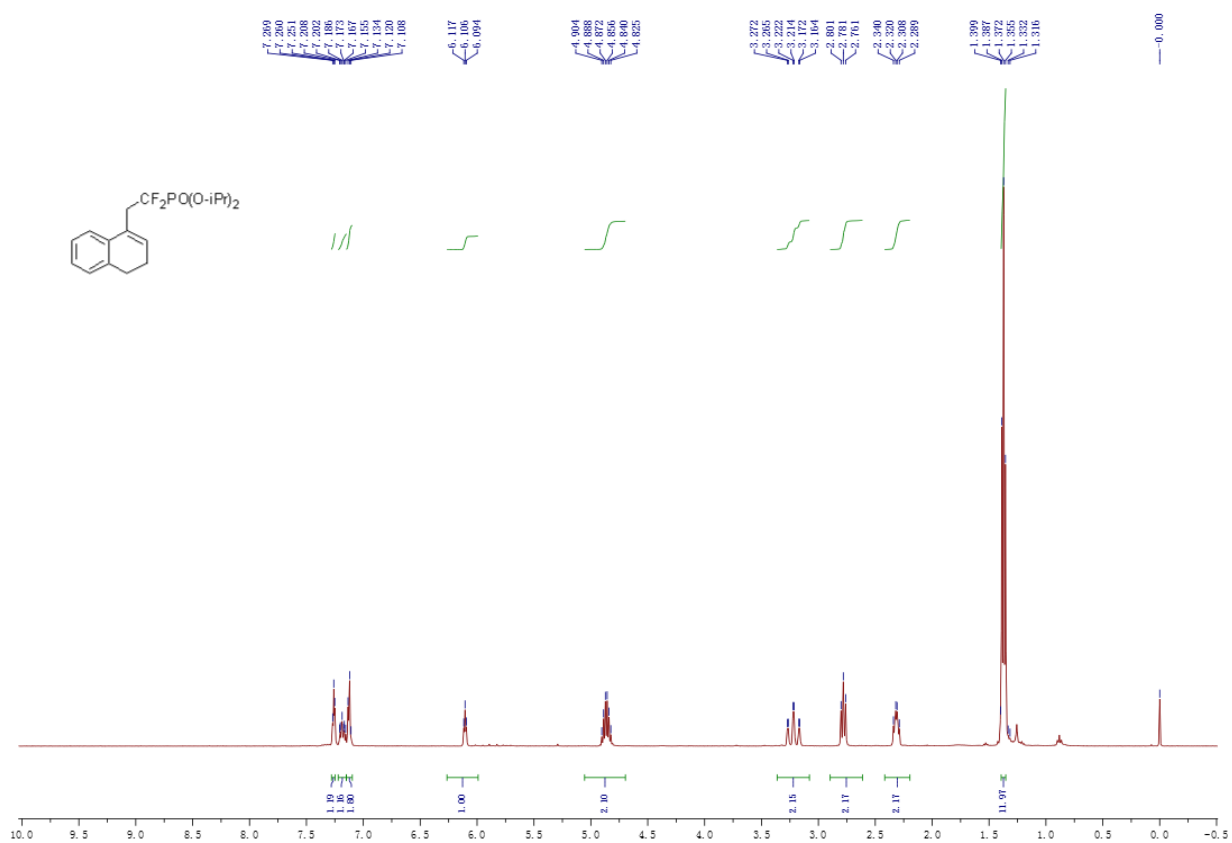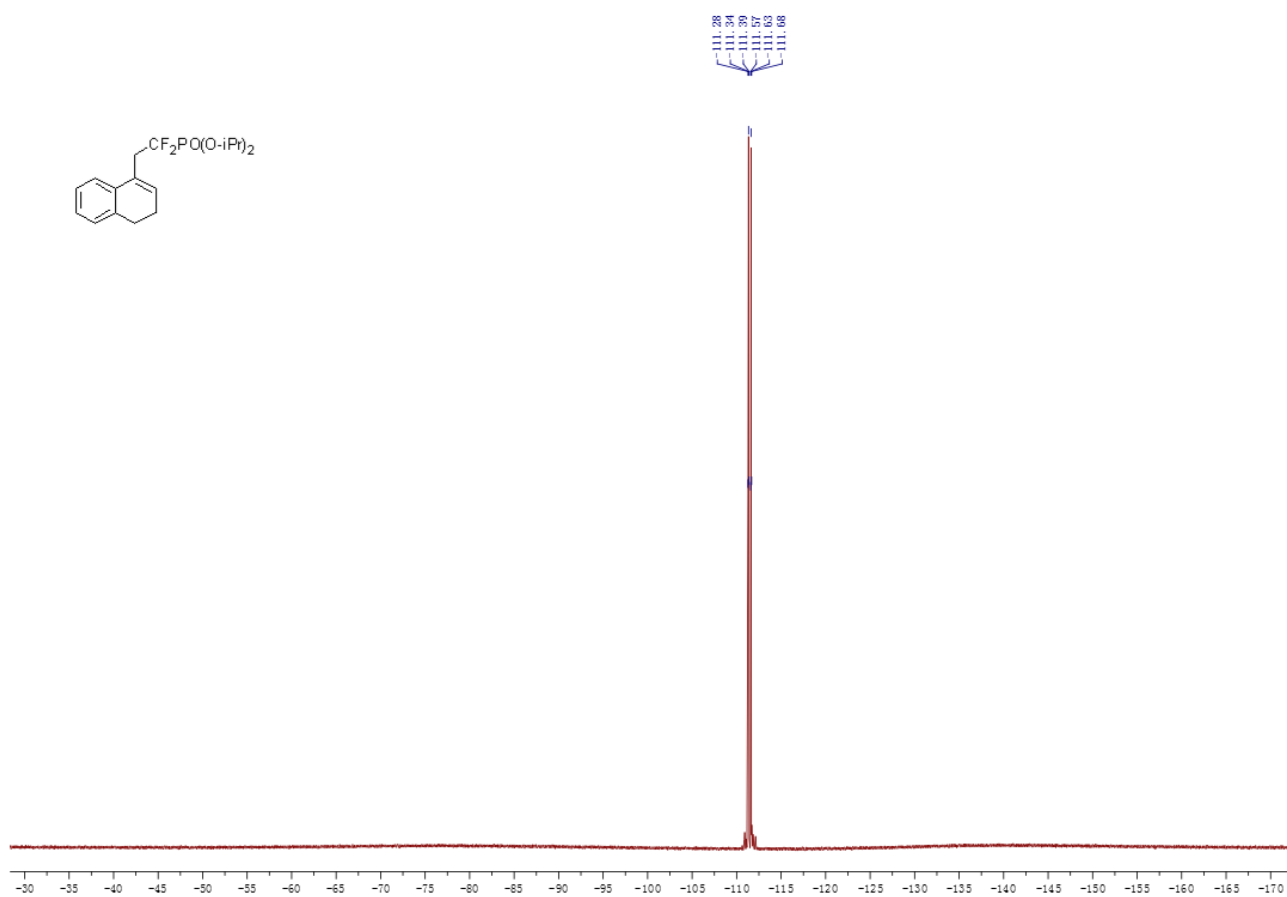

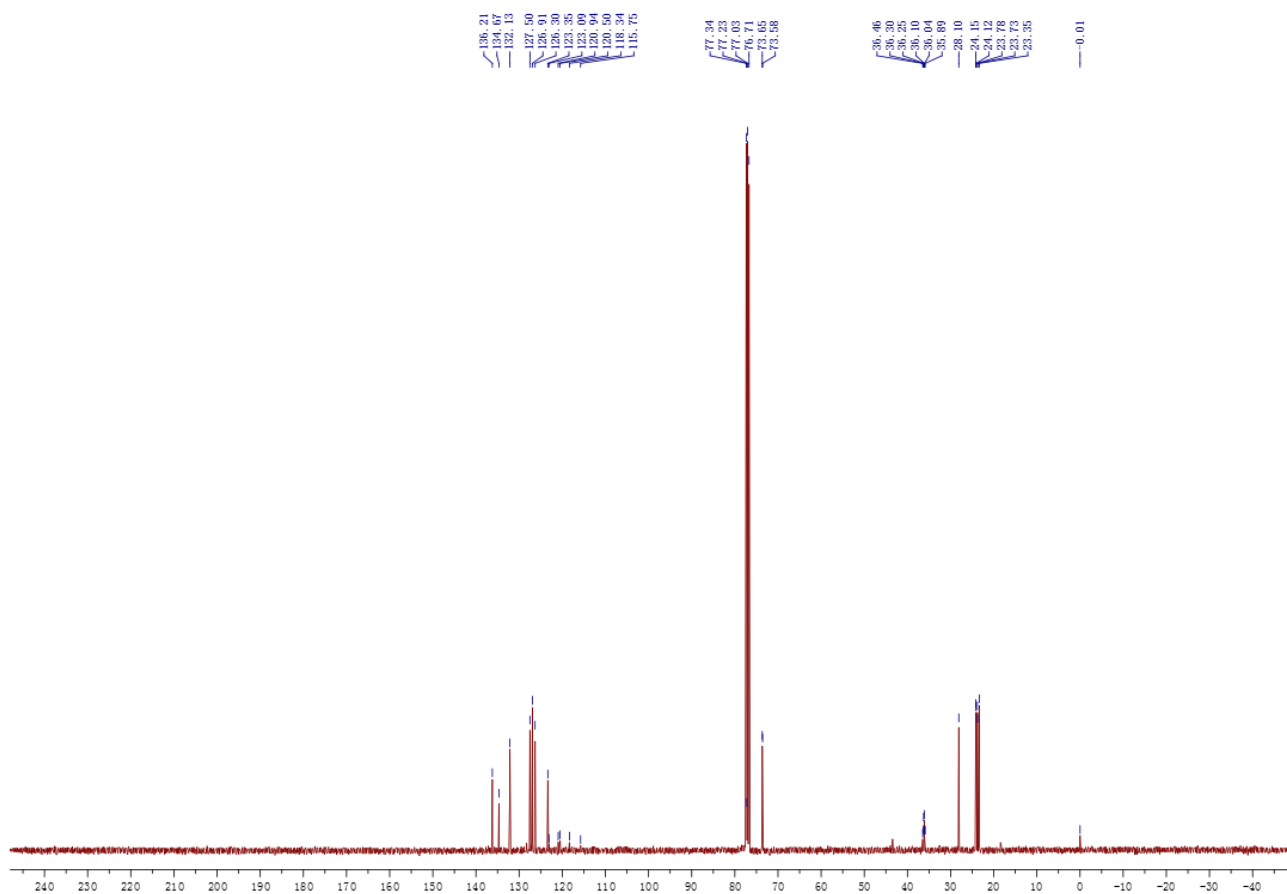

Supplement: c6qo00005c1.pdf [file c6qo00005c1.pdf]
